# Supplementary material for: About the return period of a catastrophe
Source: Copernicus journal article supplement (doi:10.5194/nhess-22-245-2022), 2022-01-31
Supplement: Supplementary file 1 [file nhess-22-245-2022-supplement.zip]

Archive with 3 entries (3 files):
- Supplement.docx
- Supplement Data.xlsx
- nhess-22-245-2022-supplement-title-page.pdf
