# Supplementary material for: About the return period of a catastrophe
Source: Copernicus journal article supplement (doi:10.5194/nhess-22-245-2022), 2022-01-31
Supplement: Supplementary file 1 [file nhess-22-245-2022-supplement.zip › nhess-22-245-2022-supplement-title-page.pdf]

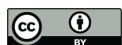

## *Supplement of*

## **About the return period of a catastrophe**

**Mathias Raschke**

*Correspondence to:* Mathias Raschke ([mathiasraschke@t-online.de](mailto:mathiasraschke@t-online.de))

- [nhess-22-245-2022-supplement-title-page.pdf](#)
- [Supplement Data.xlsx](#)
- [Supplement.docx](#)

The copyright of individual parts of the supplement might differ from the article licence.
