# Supplementary material for: About the return period of a catastrophe
Source: Copernicus journal article supplement (doi:10.5194/nhess-22-245-2022), 2022-01-31
Supplement: Supplementary file 1 [file Supplement Data.xlsx]

## Sheet: Tab. 1 Considered storm events
Table 1 - Considered storm events: List of analysed (wind) winter storms over Germany, corresponding time window for wind speed sampling, used weight and computed combined return period (CRP)
Name	Start date	End date	CRP capital weight	CRP area weight	Loss Information
Anatol	1999-12-03	1999-12-04	1.558±0.08	3.218±0.242	no
Lothar	1999-12-25	1999-12-26	13.156±1.465	9.35±1.024	no
Kerstin und Liane	2000-01-29	2000-01-31	0.9±0.026	1.236±0.045	no
Ginger	2000-05-28	2000-05-28	0.698±0.031	0.368±0.011	no
Oratia	2000-10-29	2000-10-30	0.396±0.009	0.421±0.01	no
No Name	2000-12-10	2000-12-11	1.351±0.109	0.649±0.045	no
No Name	2001-11-09	2001-11-09	0.034±0.001	0.034±0.001	no
Jennifer	2002-01-26	2002-01-29	1.953±0.097	2.722±0.153	yes
Anna	2002-02-26	2002-02-28	2.004±0.093	2.568±0.138	yes
Jeanette	2002-10-26	2002-10-28	6.966±0.421	7.235±0.461	yes
Calvann	2003-01-02	2003-01-03	1.2±0.038	0.938±0.031	no
Jan	2003-12-21	2003-12-21	0.7±0.019	0.931±0.03	no
Gerda und Hanne	2004-01-12	2004-01-14	1.24±0.046	1.006±0.036	no
Queenie	2004-01-31	2004-02-01	0.761±0.025	0.823±0.025	no
Nina & Oralie	2004-03-19	2004-03-21	1.634±0.073	2.854±0.169	yes
No Name	2004-12-17	2004-12-17	0.223±0.004	0.151±0.003	no
Erwin	2005-01-08	2005-01-09	0.787±0.027	1.327±0.059	no
Ingo	2005-01-21	2005-01-21	0.51±0.012	0.479±0.01	no
Ulf	2005-02-12	2005-02-13	1.173±0.034	1.315±0.042	no
Thorsten	2005-11-25	2005-11-27	0.093±0.001	0.071±0.001	no
Dorian (Cyrus)	2005-12-15	2005-12-16	1.034±0.039	1.41±0.06	yes
Britta	2006-10-31	2006-11-02	0.265±0.005	0.384±0.009	no
Vera	2006-12-08	2006-12-08	0.288±0.006	0.267±0.006	no
Klara	2006-12-30	2007-01-01	0.989±0.03	1.131±0.037	no
Franz	2007-01-11	2007-01-12	0.908±0.027	1.09±0.035	no
Kyrill	2007-01-18	2007-01-19	17.644±1.814	16.965±1.754	yes
Fridtijof	2007-12-02	2007-12-03	0.445±0.009	0.412±0.008	no
Resi	2008-01-31	2008-02-01	0.184±0.003	0.203±0.003	no
Anette	2008-02-23	2008-02-24	0.063±0.001	0.104±0.002	no
Emma	2008-02-29	2008-03-02	3.857±0.241	3.905±0.254	yes
Kristen	2008-03-12	2008-03-12	0.804±0.019	0.77±0.019	no
Quinten	2009-02-09	2009-02-10	0.591±0.019	0.472±0.015	no
Xynthia	2010-02-28	2010-03-01	2.898±0.162	2.327±0.127	yes
Joachim	2011-12-16	2011-12-17	0.554±0.012	0.529±0.012	no
Ulli/Andrea	2012-01-03	2012-01-05	1.232±0.04	1.112±0.033	yes
Christian	2013-10-27	2013-10-28	1.715±0.106	1.564±0.079	yes
Xaver	2013-12-05	2013-12-07	0.902±0.028	1.159±0.039	yes
Ex-Gonzalo	2014-10-21	2014-10-22	0.98±0.047	0.596±0.022	no
Elon und Felix	2015-01-08	2015-01-11	1.196±0.041	1.375±0.053	yes
Niklas	2015-03-30	2015-04-01	3.204±0.13	3.212±0.141	yes
Nils	2015-11-29	2015-11-29	0.402±0.008	0.454±0.01	no
Barbara	2016-12-26	2016-12-26	0.295±0.01	0.327±0.009	no
Axel	2017-01-04	2017-01-04	0.173±0.003	0.206±0.003	no
Egon	2017-01-12	2017-01-13	1.03±0.036	0.92±0.035	no
Thomas	2017-02-23	2017-02-24	1.084±0.041	0.781±0.024	no
Sebastian	2017-09-13	2017-09-14	0.372±0.007	0.404±0.008	no
Xavier	2017-10-05	2017-10-05	1.276±0.067	1.706±0.096	yes
Herwart	2017-10-29	2017-10-29	1.33±0.056	1.816±0.09	yes
Burglind	2018-01-03	2018-01-03	1.402±0.051	1.115±0.04	no
Friederike	2018-01-16	2018-01-18	4.919±0.338	4.406±0.309	yes
Fabienne	2018-09-23	2018-09-23	2.252±0.241	2.175±0.228	no
Bennet	2019-03-04	2019-03-04	1.431±0.049	1.243±0.04	no
Cornelius	2019-03-07	2019-03-07	0.382±0.008	0.332±0.006	no
Draggi	2019-03-09	2019-03-09	0.581±0.016	0.509±0.012	no
Eberhard	2019-03-10	2019-03-10	3.197±0.166	2.303±0.116	no
Franz	2019-03-12	2019-03-13	0.3±0.005	0.259±0.004	no
Heinz&Igor	2019-03-15	2019-03-17	0.288±0.005	0.321±0.006	no

## Sheet: Tab. 2 Event maxima
Table 2 - Storm event's wind maximum: Sample of the maximum wind gust speed [m/s] per witner storm event (storm events accoring to table Considered storms;original data source: Deutscher Wetter Dienst [DWD, German meteorological service], Climate Data Centre [CDC], https://cdc.dwd.de/portal/202007291339/index.html, download Spring 2020)
Station ID	Anatol, 1999	Lothar, 1999	Kerstin und Liane, 2000	Ginger, 2000	Oratia, 2000	No Name, 2000	No Name, 2001	Jennifer, 2002	Anna, 2002	Jeanette, 2002	Calvann, 2003	Jan, 2003	Gerda und Hanne, 2004	Queenie, 2004	Nina & Oralie, 2004	No Name, 2004	Erwin, 2005	Ingo, 2005	Ulf, 2005	Thorsten, 2005	Dorian (Cyrus), 2005	Britta, 2006	Vera, 2006	Klara, 2006	Franz, 2007	Kyrill, 2007	Fridtijof, 2007	Resi, 2008	Anette, 2008	Emma, 2008	Kristen, 2008	Quinten, 2009	Xynthia, 2010	Joachim, 2011	Ulli/Andrea, 2012	Christian, 2012	Xaver, 2013	Ex-Gonzalo, 2013	Elon und Felix, 2014	Niklas, 2015	Nils, 2015	Barbara, 2015	Axel, 2016	Egon, 2017	Thomas, 2017	Sebastian, 2017	Xavier, 2017	Herwart, 2017	Burglind, 2017
164	28	18.3	28.5	15.3	17.8	13.5	11.5	33.5	26.5	31	12.3	23.8	21.2	22.6	33.9	13.6	25.2	22.5	24.9	13.5	21.6	23	12.7	23.8	25.3	29.8	19.2	19.8	22	25.9	22.5	12.3	21	17.8	20.8	23	23.6	12.6	27.4	24.2	25.8	21.2	20	15.8	20.7	17.4	29.4	27.1	18.5
183	50	24	35.5	19.3	28	18.5	16.5	33.8	36.3	31.5	18.3	19.2	18.8	23.4	32.4	17.8	35.1	27.9	33.8	18.4	28.4	27.2	18.8	38.1	34.2	28.5	24.3	24.9	25.2	29.9	26	20.1	22.5	24.6	28.1	32.3	34.7	16.2	37.9	23.4	28.3	29	26.8	20.4	26.5	26.1	18.3	25.6	21
198	27.3	21.5	25.3	19	20.8	15	10.5	27.8	24.8	33	21.1	29.7	21.5	26.9	26.8	14.7	23	21.3	26.6	19.2	30.5	18.3	19.4	23	27.8	39.7	19.9	19.8	16.2	32.1	28.2	18	28.2	24.9	25.8	23.6	25	16	25	26.4	24.8	22.3	20.7	21.9	24.5	25.2	23.5	24.9	22.4
232	15.3	35.8	25.9	13.6	9.6	14.8	11.7	26.9	19.9	25.6	28.2	18.9	29.8	19.3	20.5	24.1	11.3	22.6	24.2	14.5	23.7	22.6	9.1	17.6	26	30.7	24.1	17.8	10.3	30.5	21.9	26.7	23.6	24.3	25.5	14.9	20.3	22.1	23	28.2	20.3	13.8	18.5	24	23.1	18.4	18.8	20.7	27.8
282	17.7	27.4	16.6	13.3	11.5	18.6	11.8	18.7	19.2	22.3	18.2	18.1	17.4	15.9	19.4	10.6	12.7	17.5	17.1	10.7	20.9	15.6	10.3	18.2	18	25.6	14.7	9.5	12.4	21.2	17.3	19.2	20.9	17.9	19.5	19.6	19.6	16.7	16.8	24.1	19	12.3	16.1	21	21.7	15.5	15.2	21.6	17
298	30	18.8	31.8	13.8	18	14.3	14	26	25.5	28	10.5	20	18.4	23.7	31.1	13.4	27.3	22.9	-999	10.6	22.3	26.2	11.8	26.2	29.3	28.3	18.3	21	22.2	26.6	22.1	13.7	20.3	19.1	22.6	26.2	28.7	8.9	29.3	21.7	25.7	24	21.6	16.6	23.8	21.4	13.2	24.8	16.1
303	28.3	17.3	27.8	14.5	16	13	10.5	26.5	31.5	30	15.1	28.7	23.6	20.9	28.1	13.5	23.2	19.4	25	11.7	23.4	22.3	12.7	21.4	23.1	34.7	19.3	18	21.2	28.7	24.4	15	24.8	20.4	23	25.5	24.7	-999	28.5	27.4	16.7	19.6	18.9	15.4	21.2	19.4	31.9	25.2	18.5
427	24.9	17.6	24.5	13.6	15.5	11.9	10.7	31.3	22.3	28.7	11.6	26.8	23.3	23.2	25.2	12.8	21.5	20.5	23.2	10.3	21.5	24.1	10.5	22.6	23.9	31	17.4	18.4	24.4	31.8	24.6	13.4	26.8	19.8	21.1	21	25.5	14.1	29.2	29.6	26.2	22.8	21.9	14.7	22.8	22.3	32.8	34.8	21.1
430	25.6	14.7	23.6	13.5	15.7	12	10.3	33.5	25.6	27.4	11.6	22.7	20.8	20.7	25.6	12.2	25	16.7	23.4	11.2	18	19.5	11.3	22.2	20.6	33.1	18.6	20.3	15.4	22.3	22.7	12.3	23.8	21	21.5	23.3	26.6	12.7	22.4	28.8	18.7	20.4	21.8	15.1	21.8	23.5	30.9	23.8	19.4
433	27.6	15.4	27.5	15	17	12.4	10.5	25.7	25.9	27.2	10.4	25.7	22.7	22.8	26.4	11.9	22.4	19.5	22.6	10.1	21.3	20.9	10.7	20.7	22.2	33.5	19.4	17.6	16.4	26.7	23.8	12.9	19.4	17.5	18.8	18.7	23.3	13.1	27.9	29.5	18	23	19.9	13.1	19.1	18.1	30.3	27.9	17.2
591	33	18.5	30.8	21	22	16.8	11.5	27.8	28.5	29	13.3	29.7	22.1	25.8	27	14.6	30.4	20.3	28.8	12.6	21.8	19.7	18.1	31.1	22.8	30.2	18.9	18.6	17.5	25.9	21.1	12.2	22.2	13.9	18.8	26.1	23.1	10.9	27.3	29.6	21.6	26.7	19.3	15.1	15.8	21.8	24.2	24.6	18
596	38	25.8	34	24	24	19.5	20.5	38.5	38.5	33.3	13.5	23.6	22.1	33.8	35.6	18.5	33.8	21.9	35.6	16	23.7	26.4	24.5	33.4	29.4	37.1	19.4	23.4	21.4	28.1	27.8	15.3	18.6	20.9	24.5	35.9	33.6	11.4	30.2	32.8	33.3	30.3	22.7	21.9	21	25.8	-999	27.7	20.4
619	32.3	25.4	27	27.8	30.1	20.6	18.9	32.2	40.7	31.3	11.4	31.9	23.5	27	33.4	18.2	31.7	23.2	30.6	12.4	25.7	30.7	27.8	32.4	35.8	30.6	21.6	26.9	16	29.5	24.7	15.6	17.9	-999	29.7	41.2	35.1	22.6	34.1	29.6	30.8	28.3	24.4	25.7	29.4	34.1	-999	28.5	27.1
656	23.6	19.8	22.6	16	22.7	16.8	16.2	22.1	22.6	26.4	18.8	24.2	19	24.2	23.1	15.3	20.7	17.1	20.7	17.4	27.7	17.8	21.3	20.9	22.5	34.1	23.4	19.6	16	22.3	18.8	17.9	27.9	20.5	21.2	22.9	23.7	16	21.5	21.8	17.5	15.9	16.5	15.7	23	19.9	23.7	23.1	20.1
662	27.6	20.5	22.5	17.5	19.9	14.3	10.7	23.7	27.3	26.8	12	24.4	20.9	22	25.8	12.1	23.9	21.8	24.4	15.7	28.4	22.2	18.3	22.7	19.7	30.9	22.3	17.7	14.6	23.5	24.8	13.7	24	20.6	26.1	21.8	23.8	15.5	22.5	27.3	22.3	17.8	18	14.4	22.3	20.9	28.6	27.1	22.4
691	26	23.2	24.5	25.9	24.3	17.8	-999	30.2	31.2	33	14.4	29.8	22.5	25	32.5	15.3	28	20.5	28.6	16.1	26.8	24.8	21.6	26.9	21.3	27.3	21.4	19	16.6	24.3	24.7	14.2	22	16.9	29.4	28.1	23.7	18.7	25.4	29.3	25.6	23.5	22.3	17.3	25.7	27.6	28.1	25.9	24
701	30.9	24.1	27.3	27.9	26.9	16	14.4	31.3	33.3	31.3	12.5	26.6	26.5	25.3	30	14.4	30.1	26.2	29.7	14.3	31.2	27.4	23.5	30.4	25.6	30.6	21.2	24.6	17.1	27.2	24.8	14.2	20.9	19.1	31	35.9	34.8	26.4	30.3	34	28.2	24.1	28	21.6	25.5	26.4	27.6	32	26.6
722	46.9	48.3	46.1	37.8	48.4	33.1	21.3	47.1	45.6	49.2	36	42.7	38.8	53	51.8	30.9	46.2	32	42.4	36.8	44.8	41.4	53.1	45	48.1	55.4	44.5	40.6	31.6	43.8	39	32.7	50.3	39.9	47.2	45.1	42.5	29.3	44.7	45	44	33.9	34.8	34.5	43.8	41.4	49.1	48.1	43.5
766	19.5	21.6	21.1	23.1	26.2	25.2	8.7	22.1	20.6	27.8	27.8	18	23.7	21.6	19.5	18.6	20.1	23.1	21.6	17.5	18	16.5	27.3	27.3	21.1	26.2	24.2	18	9.3	25.7	23.1	21.1	32.9	21.1	21.1	24.2	19.5	18	15.9	24.2	19	-999	14.9	29.8	24.2	20.1	16.5	19	33.4
840	11	28.8	22	14.8	15.5	16.5	11.8	25	21.3	26	23.5	22.6	17.6	22.8	17.1	12.5	23.8	20	21.8	14.1	22.1	16.9	13.6	20.5	23.6	35.8	20.4	17.5	15.2	27.1	20.3	21.2	22.7	23.3	20.3	18.2	21.5	16.7	24.4	20.2	19.4	13.4	15.2	24.2	22.5	17.7	17.4	20.9	19.6
853	30.3	32	29.3	17	22	21	12.5	28	28.3	30.8	25.1	26	21.2	25.2	26.5	17.1	24.3	20.7	21.7	17.9	30.9	26.1	15.8	23.3	27.1	37.4	24.3	23.7	18	42.2	25.3	23.7	26.3	24.3	27.8	24.1	25.4	20.4	25.8	30.2	23.6	17	20.5	31.2	27.8	23.2	23.3	31.7	21.4
867	17.7	20.9	18.1	14.2	16.5	11.9	9.9	22.5	17.9	21.7	19	18.4	16.6	14.7	19.2	11.3	20.1	22.5	19.7	14	21.6	18.5	9.9	25.7	19.7	31.3	19.3	14.6	12.4	27.7	20.8	19	24.5	21.5	21.8	19.6	23.5	17.1	22.4	27	17.1	14	20.8	24	26.9	17.6	21.3	22.7	23.8
880	21.5	17	21.5	10.5	14.3	11.8	14.5	21.3	19.8	30.8	12.3	23.5	22.7	18.5	24	13.4	22.6	17.5	21.1	13.1	25	21	11	20.7	21.9	35.2	19	15.5	19.3	23.6	23.1	12.8	21.3	20.5	20	20.8	21.2	12.8	22.2	24.3	15	15.9	17.1	17	20	18.1	28.4	21.1	17.8
891	31.2	24.1	26.9	24	25.7	15	19.5	30.4	30.4	29.5	11.3	24.4	21.3	23.5	26.3	16.4	29.3	22.4	28.3	18.7	28.8	25.1	15.8	30.3	23.7	27.5	19.1	21.8	16.8	27.9	21.9	16.2	18.6	18.5	27.6	32.6	31	23.7	32.2	29.1	29.7	27.9	29.3	19.8	19.4	27.7	27.7	33.5	22.6
953	21.6	30.5	22.4	19.2	25.1	22.6	11	21.8	22.6	29.5	30.5	19	25.2	24.2	21.9	19.3	19	21.5	25.8	16.7	21.8	18	24.9	27.1	23.6	32.6	24.9	22.2	10.2	25.9	29.4	24.9	30	25.2	27.7	21.5	21.8	28.9	24.1	29.2	21.2	18.7	15	28.7	25	23.6	17.7	20.8	27
963	27.6	21.5	23.7	26	23.3	17.2	11	27.6	30.7	31.9	13.3	26.1	22.2	23.4	33.8	13.5	26.9	20.4	28.7	14.2	25.2	22.2	23.8	23.8	23.9	30.8	21.9	22.6	12.7	25.2	21.7	12.3	23.1	14.9	24.8	25.7	24.7	16.3	24.7	26.4	22.2	21.5	16	16	27	24.7	27.3	25.3	22.9
1001	26.8	17.3	24.8	14.3	17.8	17.3	10.3	26.3	21.5	31.5	21	27.8	22.7	22.2	24.8	12.9	26.1	20.5	21.5	11.3	22.8	21.6	12.9	21.9	23.9	31.9	19.1	16.3	19	26.1	24.1	13.7	22	22.4	22.8	18.9	23.1	17.3	23.5	27.6	18.2	23.8	19	18.2	23.9	18.6	-999	27.4	18.9
1048	23.9	27	28.2	13.6	14.5	15.9	13.2	29.6	21.9	30.6	20.3	23.1	23	20.8	25.6	17.2	19.9	20.2	21.8	14.4	28.9	27.9	16.5	19.7	24.3	34.3	19.1	14.6	19.6	26.8	21.5	14.5	21.5	25.3	25.5	21.2	27.6	19.3	26.6	25.9	21.8	18.2	23.1	20.6	24	18.9	26.4	29.5	20.9
1078	23.7	23.1	21.4	28.4	23.9	18.5	9.8	26.7	-999	30.8	24	21.1	18.2	28	26.2	16.5	22	21.3	20.7	20.7	19.1	17.4	25.5	29.3	24.5	40.3	21.1	21.1	9.6	29	23.6	16.8	29.1	18.6	23	24.8	21.2	19.3	22.4	24.7	23.3	18.3	17.7	18	24.7	23.3	20.7	20.4	24.5
1262	21.8	34.5	23	14.4	7.7	19	16.5	27.6	21.6	30.3	30.4	23.3	29.1	18.6	24.1	27.2	12.5	26.7	28.4	12.4	27.9	17.8	15.4	25.3	26.2	33	21.2	11.3	11.8	30.2	24.1	24.1	19.3	26.8	27.8	13.8	22.7	29.7	24.9	31.4	23.5	14.2	22.1	23.1	22.1	19.4	21.1	26.1	29.7
1270	26.3	23.9	23.8	20.9	21.1	17.2	10	25.6	26.7	31.8	25.3	27.9	22.1	24.9	26	14	24.3	20	21.7	17.7	31.7	20.7	21.4	24.1	24.5	33	21.1	21	16.2	30.3	25.2	20.7	27.4	26.3	24.9	27.8	26.7	17.6	28.3	32.2	24.9	22	19.7	25.2	28.2	23.1	24.1	27.4	25
1303	24.3	24	20.8	27.6	22.9	15.5	9.9	23.9	26.5	29.1	21.6	18.2	20.6	23.2	24.3	13.6	22.3	19.4	20	19.8	17	14.8	21.8	20.8	21.5	29	23.4	18.7	11.4	22.1	21.6	15.6	26.7	19.4	24.8	23	22.7	17.5	19.8	23.3	19.4	14.3	13.5	16	26.9	18.7	16.9	22.7	21.1
1339	24.7	19.5	22.1	20.1	21.1	14.4	9.8	32.4	24.2	24.2	12.9	21.1	23.7	22.1	31.9	12.3	24.7	16.5	27.3	12.3	19.5	15.9	22.1	26.2	27.3	30.9	18.5	18	15.9	23.1	20.1	10.3	20.6	-999	23.7	23.7	23.1	13.9	24.2	26.2	23.7	25.7	23.7	17	22.6	25.7	27.3	27.8	23.1
1420	22	22.5	20.6	19.9	22.7	31.5	12.2	20.7	22.4	32.1	23.4	20.6	18.2	20.5	21.8	15.6	20.9	18.2	23.6	15.2	18.3	19	16.9	26	22.7	26.3	20.8	18.3	11.4	28.1	24.5	21.7	31.5	19.8	20.7	24.2	22.3	19.2	23	28	21.9	14.2	16.8	27.1	21.4	19.2	18.5	19.2	23.3
1443	22.3	36.4	24.4	13.4	20.6	18.1	8.1	24.3	24.5	22.2	28.4	23.8	25.7	20.9	23.2	22.4	19.6	22.9	23.7	17	21.3	17	14	17.1	20.7	23.9	24.2	19.5	14.1	25.9	21.8	31.4	25.5	22.3	21.6	18.7	18.7	17.5	18.9	24.6	16.6	12.5	15.7	20.2	20.9	17.9	15.7	17.7	21.1
1468	23.2	34	22.2	17.2	17.8	16.9	12.9	29.7	24.5	27.7	32.1	22.1	29.5	27.1	24.7	29.5	20	28.6	26.8	17.1	24	18	17	23.5	26	31.6	29.6	23.4	16.5	36.5	27.8	31.2	27.5	31.2	27.7	21.6	22	28.6	23.4	27.9	19.7	14.2	18.6	24.8	24.4	24	16.1	20.5	38.4
1544	28.3	17.8	24.8	16.8	20.5	15	11.5	27.5	21.8	28.3	11	25	22.5	25.1	27.7	12.6	30.3	16.1	25.7	13.1	21.7	25.8	16.6	23.8	25.6	22.7	18.4	19.1	14.3	24.2	23.6	11	20	17.7	19.1	21.6	20.8	12.6	24.5	25	18.9	19.9	16.6	13.2	20.3	17.5	26.3	22.1	19.4
1550	7.1	18	10.7	7.9	11.2	14	8.4	11.1	11.8	16.8	14.7	11	8.7	13.9	12.8	8	3.8	14.6	11.9	3.3	14	11.5	13.4	13.7	13.7	21.1	11.6	7	7.1	22.2	9.9	18.1	12.1	14.7	15.3	7.2	18.1	16.2	19.5	24.4	9.1	7.3	13.6	11.5	11	16.9	17	15	20.1
1580	20.5	23.7	20.8	16.8	21.9	33	9.4	18.3	20.8	30.7	22.2	21.6	28	17.9	22.5	20.4	23.4	25.3	21.5	15.4	21.7	17.8	19.1	25.4	18.3	26.4	17.5	16.4	8.6	23.2	21.3	18.4	28	19.2	19.8	19.5	18.7	18.1	22.1	26.6	15.5	16.8	15.9	24.6	20.4	15.6	18.4	24	22.1
1605	26.3	17	24	14.3	15.8	10.5	13.5	23.8	27.8	27.8	10.5	19.6	20.2	20.7	24.6	11.2	21.8	18.6	23.2	12.4	17.6	23	14.1	20	20.6	25.7	18.5	16.6	15.6	24.5	23.9	13	21.8	17.2	18	18.9	24.3	11.7	21.5	23.8	16.1	17.2	17.3	13.6	17.9	17.9	31.7	24.6	17
1612	24	22.5	23.5	17.5	21	15.5	-999	25.8	22.3	33	24.6	24.3	21.7	21.1	26.5	14	23.5	20.5	24.1	17.1	30.5	23.7	15.2	24.4	26.3	32.1	24.4	24	17.3	34.1	26	20.7	26.1	22.1	24.7	21.9	24.3	15.4	26.5	27.8	22.5	17.2	19.7	22.3	23.7	21.9	19.9	26.2	19.2
1639	20.9	20.9	21.3	18.7	20.3	14.2	10.1	24.3	22.1	33.7	19.9	21.7	18.3	22.9	21.4	12	16.9	20.5	19.7	16.3	21.5	17.2	18.4	21.8	19.8	33.8	16.8	15.8	9.4	25.9	22.2	19.4	30.7	22.4	21.6	27.8	22.6	16.7	25.1	28.5	20.1	17.8	15.4	24.9	23.9	21.3	16.3	21.6	23.3
1684	25.5	24.5	25.8	12.3	18.5	15.5	14.5	27.5	19.3	31	25	26.3	28.7	24.2	25.9	22.3	22.1	19.6	23.7	16.9	27.8	23.8	16	23.4	25.3	34.3	21.4	21.8	20.7	26.8	24.3	18.8	22.1	21.9	23.5	19	23.8	17.6	24	26.1	15.3	19.8	19.9	17.7	21.5	20	27.2	31	18.8
1691	23	20.2	22.4	17.6	20.2	14.2	12.6	25.2	25.5	29.1	24.5	23.5	19.7	24.2	28.9	11	22.2	17.7	23.2	16.6	28.8	20.2	19.4	22.8	24	29.1	22.1	18.3	16	26.5	22.3	14.2	29	20.7	23.4	24.3	22.2	18.9	24.5	32.6	18.4	18	21.2	15.1	23.8	19.4	23.3	25.1	22.9
1757	33.8	20.5	31	24	20.8	13.5	-999	19	-999	28.3	10.5	16.5	15.3	22.2	24.3	12.6	28.3	20.3	-999	12.7	21.2	20.5	12.8	28.8	28.6	29	14.7	18.3	20.2	25.9	18.6	11.7	17.5	18	18.4	21.4	28.4	8.8	25.9	21	16.8	23.8	21.1	13.4	17.8	21.5	14.7	23.7	14.5
1766	25.8	21.5	22.7	24.6	20.2	16.1	10	25.8	25.9	28.8	19.3	27.1	21.5	23	28.8	13.5	27	24.1	22.8	17.7	20.4	18.8	22.3	23.7	21.9	30.9	20.9	19.8	14.2	24.5	23.9	13.9	24	12.8	30.9	22.2	24.2	14.9	24.8	28.5	21.6	16.8	18.2	14.7	26.6	23.3	22.6	21.6	23.1
1963	30.9	25	32	-999	31.7	19.3	20.1	-999	20.8	34.3	7.3	25.6	22	22.2	27.5	19.8	35.3	27.6	27.8	17.8	25.9	28.2	24.9	32.7	32.6	33.3	20.2	29.8	20.1	28.7	23	14.6	18.3	16	30.6	45	37.4	26.2	30	31.9	35.5	34.3	29.6	24.3	19.6	32.2	24.4	36.4	22
1975	30	21	25.4	23.7	20.8	14.6	11.8	24.6	31	27.6	10.1	25.7	21.3	23	27.4	12.9	25.9	19.1	27.3	13.1	23.4	20	20.1	23.4	29.1	25.1	18.3	22.3	16	25.5	22	11.9	17.5	14.2	29.3	33.4	27.6	12	29	29.8	21.4	28.6	21.8	19.5	24	24.2	28.1	28.3	21.1
2014	25.6	28.3	27.8	23.2	22.9	14.3	10.1	23.8	31.1	28.6	12.4	22.6	20.1	22.3	28.4	12.4	24.7	19	24.3	17.8	29.8	23.5	21.6	24.4	22.2	31.1	22.1	19.1	13.9	25.9	23.4	14	22	16.8	27.2	24.6	21.9	17.3	24.7	30.9	23.1	20.4	21.8	17.5	22.6	21.9	31.6	27.8	23
2044	27.3	22.3	27.5	19	25	17.3	15.5	25.5	26.8	29	21	25.2	21.2	-999	23.8	17.4	24.6	15.9	23.4	18.3	28.2	21	21.2	27.1	24.3	27.6	24.5	19.3	17.5	27.2	23	15.6	29.5	21.4	27.6	24.2	22.6	17.3	24.4	22.7	23.1	15.7	17.5	15.8	19.4	19.5	21	25.2	18
2171	21.8	20.8	20.3	17.5	21.2	17.7	10.2	-999	28.9	29.8	22.6	22.8	16.5	21.2	24.5	12.2	18.7	23.3	19.2	17.2	23.7	16.1	17	20.5	24.4	30.7	23	18.3	11.7	23	23.8	16.9	30.2	19.2	22.7	21.4	21.1	20.5	21.3	23.2	21.6	15.2	15.9	21.6	23.1	18.1	16.3	21.6	26.1
2252	23.2	21.2	20.9	10.1	17.1	13.4	11.3	21.9	18.1	30.4	15.4	19.4	20.9	17.8	25	14.6	18.4	18.9	23.2	13.4	25.5	19.7	13.1	18.1	21.3	30.7	21	17.6	17.7	25.1	21.9	11.7	19.8	21.4	19.4	13.8	21.4	13.8	21.6	25.6	11.6	16.1	15.7	15.8	21.2	16.6	20	21.9	15.3
2261	21.9	22.1	22.4	16.1	16.3	17.3	11.4	27.8	20.8	27.4	24.7	23.8	19.7	20.3	22.3	11.7	24.5	17.5	20.5	14.4	24.1	17.7	12	22.3	20.8	32	18.7	19.2	15	23.3	20.9	20.4	20.1	21	19.4	24.5	19.1	17.8	22	26.3	17.1	12.4	16.4	23.6	23.1	17.6	18.4	28.1	18.7
2290	33.7	48.4	37.1	17.6	16.4	30.5	-999	37.3	30.2	38.5	43.2	32.3	39.2	30.8	31.3	39.1	22.7	41.5	37.2	21.6	37.8	25.4	22.4	33.5	36.9	45.1	29.5	15.3	18.7	40.9	37.8	36.6	19.9	26.7	30.8	20.1	27.9	24.3	34.9	42.5	27.8	16.6	28.5	28.3	24.6	25.4	27	32.8	37.1
2303	30.9	19	31.4	20.6	19	15.9	12.3	28.3	29.8	28.3	9.3	19	17	24.7	28.3	16.5	31.9	17	27.3	11.3	29.3	20.6	17.5	30.3	26.7	29.8	15.4	22.6	16.5	27.3	20.1	12.3	15.9	13.9	23.1	21.6	28.3	13.4	36	29.8	26.8	27.3	16.5	20.1	19.5	25.7	18.5	28.8	15.9
2385	25.7	38.6	25.2	22.1	30.3	22.6	10.3	24.7	22.6	29.3	30.9	21.6	28.8	24.7	22.1	-999	20.6	26.2	26.2	15.9	23.1	19	25.7	23.7	23.7	31.9	26.2	16.5	11.8	30.9	26.8	27.8	35	22.6	27.8	20.6	20.1	21.1	21.6	26.2	16.4	12.3	11.8	29.8	22.6	22.8	15.8	18	29.8
2483	30.4	28	32.3	24.5	31.5	27.1	16.6	28.5	29.3	36.6	30.1	27.5	25.5	33	35.7	18.3	30.5	29.9	27	25	27.9	20.1	26.3	28.6	27.5	37.9	27.8	23.6	20.6	35.5	28.9	24.6	34.9	25.5	32.3	27.8	30.8	25	29	32.4	28.5	21.8	27.7	29.6	30.9	27.3	27.7	31.6	28
2597	16.6	22.8	18.7	11.8	15.2	15	8	17.5	-999	26.4	19	20.6	15.8	18.8	18.5	8.4	21.9	24.8	30.1	12.9	25.2	18.7	12	23.4	22.8	31.6	18.9	16.4	11.2	31.2	26.2	17.3	27.4	21.7	23.1	20.3	22	22.1	24.4	25.2	19.9	12.7	17.5	27	23.2	20.6	17.9	20.9	26.2
2638	22.4	42.8	26	21.2	20.4	22.5	14.4	30.7	27.7	33.5	38	25.2	32.2	24.6	26.6	28.5	22	21.1	27.1	17.9	19.3	20.2	16.2	29.6	31	35.5	28.2	25.2	14.4	33.4	29.5	31.2	27.8	30.4	27.6	26.9	21.5	31.8	26.5	30	23	14.1	14.9	27.6	28.2	24.3	16.8	18.4	30
2667	22.9	24.2	25.8	21	21.2	21	10.1	24.8	23	30.4	21.1	18.3	19.3	18	24.6	17.5	18.2	21.5	21.2	17.3	21	18.6	18.2	21.3	18.1	35.5	21.2	16.9	11.5	27.9	23.3	18	24.9	19	24.4	21.1	26.6	17.2	26.8	23.8	19.1	17.7	17.8	19	23	17.8	19.7	22.6	26.1
2712	14.5	30.7	20.1	12.7	10.6	16.6	10.8	23.3	22.7	23.3	30	19.7	25.6	16.4	16.6	24.7	8.5	21.9	23.1	12.4	22.6	13	14	20	21.6	26.3	26.3	14.5	6.3	27.3	22.7	24.7	21	24.7	25.3	18.1	16.8	24.8	22.6	25.3	18.3	11	14.9	26.7	20.4	15.7	14.1	15.1	24.9
2773	22.1	27.8	20.6	11.8	8.2	22.1	11.3	22.6	21.1	29.3	23.1	20.1	21.6	16.5	19.5	9.8	19	18	22.6	10.8	22.1	17.5	7.2	19.5	22.6	30.9	19	13.4	13.4	32.4	20.6	19.5	15.9	20.1	21.1	15.4	19.5	20.1	22.1	26.2	20.6	13.4	15.4	29.8	25.7	15.4	21.6	26.2	22.1
2794	29.5	18.5	26.5	18.3	21	14	13	34.5	29	30.3	13.1	26.3	24.8	26.4	29.3	12.5	27	19.8	26.8	12.9	22.9	20.6	13.6	26.4	26.4	29	18.5	20.4	15.1	24.8	25.8	12.7	23	16.1	20.9	27.4	23.6	11.4	26.6	25.8	21.7	23	20.5	14.8	20.8	20.1	-999	24.2	20.9
2812	15.2	39.9	20.1	15.8	22.1	15.4	11	24.5	21.3	22.9	24.3	17.3	23.6	18.2	20.8	20.8	12.8	16.7	19.8	14.9	14.4	13	13.4	16.4	22.4	22.6	24.7	20.7	8.2	21.3	20.8	28.5	22.7	25.3	20.5	18.8	15	18	16.8	25.8	16.7	10	11.1	25.1	19.5	20.4	15.6	12.9	25
2905	15.9	33.4	25.7	8.7	9.3	17.5	11.8	27.8	22.1	26.2	26.2	20.6	25.7	19	21.6	23.1	11.8	26.2	24.2	12.3	26.7	15.9	9.3	17.5	25.7	28.8	22.1	15.9	12.3	27.8	23.7	24.7	21.6	24.2	25.7	17	20.1	23.7	24.2	30.9	22.6	11.3	20.1	22.6	21.6	19.9	20.1	22.5	25.1
2907	37.7	25.1	27.2	22.2	24.5	17.7	13.8	33.2	33.6	29.6	12.4	21	16.5	19.5	27.7	16.2	32.8	20.7	22.9	12.9	21.1	15.7	15.7	31.6	29.4	28.6	17.2	28.2	18	27.8	20.7	12.7	17.1	12.6	26.7	17.9	33.1	16.9	28.5	27.1	25.1	26.2	26	19.9	17.3	25.7	17.1	31.5	15.1
2925	28.3	25	23.8	18	24.5	18.8	12.3	25.8	29.5	32.8	20.1	26.3	19.3	26.8	25.7	14.4	25.7	20.1	21.8	19.4	26.2	21.9	22.5	25.2	23.6	32.5	24.2	22.1	14.6	26.8	25.3	16.4	26.5	19.9	23.9	23.3	22.7	17.8	22.8	25.4	22.9	15.6	17.1	22	25.9	19	20.9	21.5	19.4
2928	24.8	19	19.5	13.5	15.5	14	9.8	27	20.5	29	20	23.5	20.3	21	23.3	11.8	19.7	15.9	20.2	13	-999	20.1	11.1	17.5	17.6	24.7	16.5	16.2	12.4	24.2	17.4	15.3	21	20	18.5	17.7	19.7	13.5	22.9	25.2	16.6	13.6	16.8	18.1	19.4	16.4	17.8	23.9	16.6
2932	23.8	17.2	20.2	12	17	15	12.3	25.1	21.5	32.2	21.3	29.2	20.5	22.8	25.5	14.6	20.7	20.4	24.6	14.4	30.9	27.1	15.4	20.8	22.9	31	20.2	18.1	17	27.9	25.8	20.2	27.4	23.8	22.5	23.6	25.5	14.6	27.3	32.3	23.7	18.3	21.6	21.6	25.9	20.7	26.6	29.5	23.3
3015	27.8	14.8	28.8	12.8	16	12.3	13.3	25.3	22.8	28.8	12.3	31.5	26.9	24.9	27.4	14.9	25.9	19.4	27.3	11.5	21.9	24	12.4	22.4	26.4	33	22	18.1	23.9	29.1	25.5	11.2	26	23.6	23.5	23	27.1	15.4	24.1	28.9	20.9	-999	18.4	16.3	21.4	24	32.6	23.1	18.2
3023	22.8	22.8	20.3	23.1	20.9	15.8	10.1	22.6	24.4	27.1	11.3	21.1	17.2	21.8	25.3	11	27	14.9	21.7	15.1	16.4	20.5	19.9	20.9	22.7	32.6	18.4	21	13.7	24.1	19.3	14.3	22	12.9	23.7	28.5	20.9	12.9	21.2	25.7	22.6	17.6	18.8	15.3	24.4	23.3	20.6	20.5	22.5
3028	21.9	22.9	22.1	23.9	18.5	16.8	7.6	22.6	24.8	28	19.4	23.1	21.1	28.3	23.7	11.4	20.8	17.3	21.5	17.4	25.7	18.3	22	25.8	22.8	29.7	18.4	19.1	13.9	22.6	25.5	17.9	24.9	20.2	27.9	24	20.2	18.8	23.8	26.2	22.8	19.7	18.4	15.4	21.1	21.2	22.8	21.8	22.7
3032	51	27	38.1	23.1	34.1	18.4	21.7	35.5	37.5	34.6	12.4	29	22.3	25.4	31.9	20	41.1	26	29.6	16.5	30.1	30.3	28.3	32.8	36	35.5	20	32.8	21.4	32.5	23.7	14.7	17.8	19.4	33.6	43.7	41.2	23.6	34.3	29.8	36.8	31.9	34.3	24.1	19	31.2	25.5	39.5	21.1
3086	29.9	22.3	23.7	21.7	21.2	14.4	11.3	31	26.6	26.2	8.4	19.7	17.5	20.5	25.2	12.9	25.5	14.7	28.4	12.9	18.3	20	18.7	26.9	25.3	30.6	18.5	22.1	17.5	25.2	24.4	11	19.4	16.1	24.1	28	27.1	9.4	25.1	26.4	20.6	20.7	18.2	15.5	18.9	17.5	24.4	24.8	15.8
3093	23.5	24.6	24.9	20.1	22.9	13	12.9	24.8	27.4	25.2	12.4	22.8	20.3	23.1	23.8	11.8	25	12.4	21.3	9.2	16.5	13.3	13.8	22.4	17.5	27.9	17.1	17.3	16.1	22.2	24.4	10	19.7	13.2	21.8	22.5	25.3	11.9	22.6	24.6	24.1	18.1	19.4	14.6	18.6	21	25.4	22.1	20.3
3098	21.8	23.7	25.5	22.6	22.1	22.5	9.2	24.9	29.4	33.9	25.8	20.2	19.9	24.5	26.1	14.8	20	19.7	21.3	20.3	22.5	17.2	21.8	27.2	21.7	34.8	20.9	17.1	12.8	27	22.7	16.3	25.2	22	24	19.5	21.1	18.5	27.4	25.9	25.3	16.1	15.5	18.9	30.3	23.4	19.1	26.1	28.2
3126	26.3	15	25	15.5	19	13.3	12.8	-999	22.8	28.5	11	24.4	20.7	21.3	24.5	9.7	25	21.1	23.4	12.6	22.2	22.5	16.3	21.1	18.7	28.9	17.6	15.9	23	23.2	20.9	15.4	18.6	19.2	22.7	19.5	22	14.4	20.7	25.7	16.1	16.1	19.2	15.1	19.7	20.9	27.1	25.5	19.1
3166	23	24.3	23.5	14.8	13.8	15.5	11.3	27.5	23	32.3	23.4	22.4	19.1	20	24.7	14.1	21.6	18.8	22.3	12.7	16.5	19.8	17.5	22	29.5	30	19.9	18.9	16.5	26.4	21.4	24.3	21.4	23.2	22.6	22.1	20.4	19	22	21.5	21.4	14	17.4	24.3	24.4	19.2	19.2	25	20.7
3167	20.1	25.4	20.9	19.9	26.9	15.1	11.7	23.1	24	26.8	20	17.9	17.4	23.1	23.5	12.8	22.7	20.2	23.8	14.1	20.5	19.9	26.1	21	21.8	32.5	26	20.4	14	24.5	22.4	19.2	29.9	20.4	22	25.1	21.3	17.6	20.2	24.5	18.9	15.1	17.3	19.8	26.6	17.7	18.2	21.7	19.8
3231	21.5	24	25	18.5	17.8	15.8	9.5	26	23.3	29.3	24.8	21.9	21.7	23.6	22.8	12	18.7	27.4	24.5	13.7	30	21.7	14.1	24.1	21.8	29.7	20.7	20.6	13.4	29.5	23.4	17.4	28.3	18.9	21.7	19	21.9	18.3	21.6	25.3	19.2	13.4	18.7	20.1	22.3	15.8	16.9	22.8	19
3254	24.1	22.2	20.5	24.4	21.4	14.6	8.4	24.6	27.8	27	13.9	20.2	17.9	20.2	25.5	9.7	23.6	17.7	28.3	12.4	20	17.4	17.6	27.8	22.3	30.9	18	23.7	14	23.3	20.3	12.7	20.8	13	27	28.9	22.6	17.4	20.7	25.2	25.6	11.8	11.8	9.8	15.9	15.9	17	14.4	22.6
3287	24.1	27.7	23.4	18.2	16.8	27	10.8	25	23.4	28.1	25.3	20.6	26.5	26.9	22.9	18.2	18.9	20	24	13.6	24.6	16.6	18.1	22.5	22.9	31.6	22.9	18.8	12.6	29.2	23	24.8	26.6	24.1	26.5	21.9	24.5	22.9	23.3	25.7	22.3	14.9	16.2	28.8	24.6	18.6	19.5	20.3	25.6
3366	14.8	33.2	21.1	9.2	8	17.1	15.9	26	19.1	27.3	26.8	16.1	28	14.3	19.9	6.4	11.2	29.9	26.7	5.9	28.2	19.2	11.7	20.6	26.9	38.3	21.4	7.3	12.8	38.4	20.4	23.5	17.9	27.5	28.2	11.6	21.2	26.8	25.4	31.5	18.3	14.8	20.3	18.3	21.7	16.8	19.7	27.1	24.9
3484	18	35	23.7	10.8	8.2	13.4	11.3	23.1	20.1	29.8	26.8	20.6	19.4	13.9	18.5	9.8	7.2	19.5	24.7	8.2	19.5	16.5	7.2	15.4	20.6	26.8	20.1	13.4	9.3	24.7	21.6	21.1	19.5	25.7	22.1	19	20.6	27.3	12.3	30.9	19	13.9	18	22.1	23.1	17.5	18	22.1	22.6
3513	26.5	24.5	23	17	20.3	21.8	12.5	28	25.8	30.3	25.3	25.3	23.2	26.6	26.6	14.5	24.1	23.5	23.5	19.7	28.8	19.8	17.9	26	25.8	31.8	26.6	20.6	18.4	31.7	21.6	27.3	28.1	27.2	25	21.6	23.7	21.9	27.2	31.2	23.7	16.5	17.2	28.8	25.7	25	20.9	28.6	20.1
3552	33.3	18.5	26.8	16.3	18.5	12.3	11	31.5	-999	29.3	10.5	27.6	22.1	21.5	29	11.5	25.7	17.8	25.5	14.6	18.8	18.3	12.3	25.8	23.8	29	18.3	19.5	16.4	27.3	24.3	10.1	21.5	18.5	20.9	20.1	22.4	11	32.6	27.1	18.4	22.5	19.2	12.9	19.5	17	28.7	22.8	20.1
3623	21.1	22.1	20.6	22.1	23.7	20.1	8.2	24.2	24.7	32.4	22.6	22.6	20.6	30.3	24.7	18.5	21.6	17.5	21.6	20.1	23.7	19.5	19.5	24.2	24.7	34	18	16.5	10.8	26.7	25.7	20.1	24.7	25.2	25.2	22.1	25.7	18	25.2	26.2	22.1	19.5	18	25.2	28.3	22.1	22.1	22.6	31.4
3631	31.4	23.7	25.9	25.5	27.1	15.7	21.8	28.6	34.4	34.2	14.5	29.4	27.5	23.4	27.1	19.1	30.4	27.1	29.1	11.4	30.6	34.3	20	28.6	29	31.3	27.8	25.8	15.9	31.6	25.9	18.9	18.4	22.2	33.1	37.9	33.8	27.4	28.7	33.6	31	27.3	30.2	28.2	23.8	27.7	32.4	32.5	26.5
3639	33.4	20.6	28.8	26.8	25.2	14.9	14.9	30.4	35.5	29.3	10.8	25.7	20.1	26.8	29.8	15.4	33.4	29.3	32.4	13.9	26.2	27.8	15.9	29.3	23.7	31.4	22.1	21.1	18.5	28.2	25.2	13.9	18.5	17	29.8	32.4	30.9	23.7	36.5	34.5	26.2	36.5	27.3	24.2	20.1	30.4	25.2	31	24.7
3660	24.4	25.3	22.3	24.1	26.2	23.6	11.2	25	22.5	31.6	23.9	20.4	19.2	24.8	23.7	21.3	21.1	23.5	22.7	19.4	23.4	19.5	25.2	27.8	28.7	34.2	22.9	18.1	9.4	28.1	26.8	19.1	27.7	18.9	23.2	22	19.2	20.4	21.2	26.8	19.1	13.3	16.1	21.2	18.8	19.1	14.9	22.4	29.1
3668	18.6	28.4	21.8	16	13.7	24.4	13.3	18.7	20.3	29.6	27.5	24.4	25.5	18	18.4	12.4	17.3	21.3	29.6	12.4	23.3	17.9	10.1	24.6	21	27.9	16.2	14.6	12.1	31.5	25.7	21.9	22.4	23.3	22.2	18.4	22.2	22.6	22.8	26.4	18.3	12.3	15.6	27.1	24.5	19.5	20.6	21.9	22.8
3730	10.8	30.9	17.6	7.3	12.3	14.7	11	9.1	12	20.5	16.4	20.9	26.7	10.3	12.3	14.7	8	17.4	18.1	11.6	13.4	15.3	22.5	18	16.6	19.8	17.2	13.9	6	22.9	18.8	17.7	15.8	19.9	24	9.7	17.7	26.6	18.2	21.1	7.5	13	11.5	16.9	15.8	19	12.3	12.1	21.2
3761	19.2	34.5	24.5	13.7	12.6	23.3	9.3	21.2	20.1	27.7	28.8	20.9	33.2	21.3	25.7	17.6	22.3	23.4	25.1	14	22.2	19.5	15.4	21.8	23.4	30.5	21	18.2	12.9	26.3	22.8	26	23.6	23	24	20.9	20.2	25.6	24	29.6	21.2	15.5	16.2	29.3	24.1	22.7	17.5	24.1	30.4
3811	23.8	21	25	16	16.3	17	11.3	28.3	23.5	36	21.6	27.8	22.5	24.9	22.7	13	23.5	21.2	27.4	16.9	31.4	23.1	11.9	22.2	22.4	30.4	23.4	24.2	20.9	29.2	25.7	19	23	25.3	26.7	19.5	23.5	15.8	25.6	25.9	18.7	19.1	20.7	24.2	28.8	19.8	26.3	31.1	20.9
3821	24.8	20.8	23.3	14	16.8	14.8	10	23.3	21.5	31	21	23.3	21.6	23.5	26.5	12.4	24.9	17.2	20.7	15.6	28.5	21.7	16.1	20.7	24.1	31.7	23.6	19.2	16.7	31.8	26.8	17.8	23.1	25.3	21.7	19.5	20.2	16.9	25.1	25.7	20	20.9	16.8	21.9	23.7	17.7	24.5	27.7	21.9
3946	23.3	21	19.8	17.3	19.3	15.3	10.8	19.3	21.3	29	21	22.9	17.6	20.5	22.8	15.1	20.4	19.8	19.7	12	32.3	17	15.8	22.1	25.6	31.4	19.2	17.2	13.5	30.2	19.2	17.3	21.5	21.9	20.9	19.8	20	17.9	24.8	22.2	17.4	15.4	19.8	23.1	20	16	16.2	25	19.8
3987	28.5	21	26.8	16.5	19.3	16	12	27.8	26.5	34	14.8	27.2	23.9	23.6	31.9	14.9	26.7	24	26.1	13.5	25.6	24.2	14.1	24.3	26	32.1	20.7	21	26.1	30.6	26.8	16.4	23.9	22	23.1	21.4	26.8	14.6	25.8	33.4	23.4	22.2	21.8	16.9	22.8	21.2	30.8	27.3	19.8
4024	37.3	25.5	30	19.5	21	11.5	11.5	32.5	29.8	30.8	12	17.9	19.7	24	31.3	12.9	33	19.9	27.8	14.1	25.2	19.2	14.1	34	29.6	27.2	19.2	22.5	21.7	26.8	20.7	13.2	19.2	18.3	22.9	28.9	29.7	8.9	25.4	22.6	19.6	24.2	19.8	16.1	22.8	21.8	12.8	23.6	13.9
4104	12.2	33.7	19.4	8.7	7.8	19.2	15.3	20.9	18.9	29.2	25.7	17.2	23	14.1	20.1	9.4	11.1	18.5	23.3	10.2	19.5	18.4	7.8	20.2	26.2	31.9	20.3	12.4	11	15.8	20	18	18	25.4	21.4	18.5	20.8	27.4	21	30.7	15.9	13.7	15.9	24.7	22.3	14.2	23.1	24.2	17.8
4225	14.1	26.9	16	12.1	7.1	19.2	13.6	18.6	14.1	27.4	23.5	17.1	19.9	13.4	17.7	7.2	13.6	18.9	-999	8.2	18	17.8	7.1	21.7	19.4	28.5	18.5	12.3	12.1	34.4	21.2	17.8	13.8	20.9	17.9	14.7	18.2	24	18.3	23.6	13.8	12	13	20.8	21.9	14.5	18.5	21.1	17.4
4271	34	22.8	31.5	20.3	23	18	20.5	31.5	27	35	10.3	26.6	22.1	26.8	30.4	13.4	31.4	22.6	30.7	14.7	24.7	26.3	18.2	29.7	34.2	33.6	20.1	21.7	22	29.7	24.6	13.7	20.1	20.8	24.1	24.1	37.7	10.2	27.7	32.3	24.6	32.5	28.5	18.5	19.4	23.5	20.4	32.8	14.9
4280	17	28.8	20.1	12.3	13.2	22.1	15.4	21.6	19	26.7	24.2	19.5	24.2	15.9	18	5	10.3	20	25.6	12.3	22.6	20.6	8.7	21.1	20.6	32.9	15.4	10.3	14.9	30.4	22.6	22.6	19.5	21.6	23.7	19	-999	29.5	22	29.9	17.3	13.5	15.8	25	22.8	18.4	19.3	22.9	25.6
4336	19.4	35.6	21.7	17.9	22.4	16.6	9.9	22.1	20.9	27.9	28.3	20.7	25.9	18.9	23.6	24.5	17.1	22	21.8	13.7	19.1	19.5	23.1	22.9	21.8	29.6	24.5	18.2	11.3	28.1	26.9	25.2	30.7	26.7	27.4	18.4	17.7	29	20.9	24.7	18.3	11.1	11.7	27.4	21.1	20.6	15.1	17.3	25
4371	24.9	22.7	20.8	27	22.9	16.1	10	23.9	24.6	27.2	17.5	23.6	15.1	23.4	25.5	12.5	27.2	17.5	24.6	16.9	22.4	14.8	24.7	25.4	24	28.8	22.6	19.2	14.5	21.7	22.4	12.7	24.3	12	24.2	23.8	23.2	19.6	21.3	25.5	23.1	14.4	18.4	14.4	24.8	23.8	19.1	21.1	19.8
4464	28.5	28.5	23.5	20.5	18.3	16.8	11	28.8	24	34.3	22	24.7	21	24.9	28	14.1	25.3	22.8	24.9	17.1	34.4	24.3	15.1	27.5	27	39.2	23.4	20.3	16	28	23.6	21.4	26.2	24.8	22.5	23.3	22.8	24.6	26.9	30.5	20.8	19.7	22.5	31.4	26.8	26.2	21.4	32.7	23
4466	34.5	19.8	28.9	20.1	22.5	18.1	13.7	29.3	32.5	31.7	12.8	20.3	16.9	21.8	29.3	14.9	31	18.3	25.6	11.8	21.1	19.9	18.9	29.8	25	30.1	17.8	24.9	18	28.1	21.1	12.4	17.6	14	25.7	35.6	32.8	11.6	29.3	24.9	25	27.4	21.7	19.6	17.8	24.9	17	25.9	17.4
4501	24	24	26.5	23.5	29.8	20.8	9.5	27.3	28	30.8	25.5	28.4	21.8	31.2	29.5	19.2	28	22.4	24.1	27.1	25.5	20.3	24	30.8	28	40.9	33.2	24.9	16	27.9	26.9	28.4	39.1	28.7	29.8	28.6	24.6	24.2	25.4	27.9	24.4	19	18.7	37.5	27.6	27.7	25.5	25	23.7
4625	34	24.8	29	22.8	22.5	10.5	11.5	31.3	31.8	30.3	11.3	24.7	23.2	28.5	29.9	15	33.5	18	29.5	13.7	19.4	20.9	21.6	26.3	28.4	31.7	20.6	20.3	18.3	25.9	23.1	13.4	19.3	15.2	20.8	29.7	31.3	11.6	26.2	27.7	28.2	23	20	16.6	21.5	25.2	25.7	27.9	20
4642	27	18.3	27.8	19.5	24.8	17.3	12.5	20	28.3	30.8	10.8	26.1	20.6	28.7	30.3	12.1	24.4	16.9	28.2	14.1	27.6	20.7	16	25.8	24.4	26.8	20.1	18	16.8	25.6	22.9	11.4	20.9	17.8	24.5	23.9	27.6	12.6	28	26	23	20.3	22.6	14.3	21.2	22.7	29.8	29.4	21
4745	26.4	20.7	20	21	22.6	13.3	13	28.8	31.5	25.6	12.3	25.2	20.8	21.6	26.9	14.1	24.6	16.9	24.7	12.4	25.5	19	19	25.6	22.4	26.2	17.3	18.4	18.3	24.3	20.5	12.2	21	13.5	25.2	19.9	23.2	15.2	25.6	28.8	22.7	22.4	18.9	16.1	19.9	23.2	28.8	23.3	22.3
4887	25.5	49	33.1	18.6	22.4	26.8	13.8	31.8	27.4	37.1	33.6	24.6	36.7	26.6	27.5	31	18.1	34.3	29.7	20.4	32.7	20	17.4	26.5	28.8	37	27.2	21.8	19.9	36	29.3	28.5	34.9	33.3	33.4	28.8	29.7	30.3	30.8	38.1	27.6	13.4	19.5	35.4	27.4	24	23	28.2	32.3
4911	14.6	34.5	20.2	11.3	7.1	16.4	13.6	25.5	20	27.1	25.7	15.8	24.4	13.2	20.4	9.2	9.4	23.7	22	10.1	24.9	17.3	8.9	16.8	22.4	28.8	20.5	8.7	11	25.9	17.8	21.8	16.8	25.4	23.4	14.8	20.9	21	22.8	30.7	18.8	12	16.8	18.6	20	13.2	19.1	23.3	17.6
4919	32.5	25.8	33.1	26.1	30.1	20.5	20	35.1	40.5	36	12.3	29.3	22.7	11.6	41.7	20.8	37	30.7	30.9	16.9	27.4	30.4	23.2	38.7	33.1	40.6	20	32.2	19.7	31.5	27	15	17.1	18.5	31.3	46.1	39.3	26.5	34.6	34.7	31.3	31.7	28.4	24.9	22.7	34.2	21.3	37.7	22.6
4928	15.3	38.7	22.8	15.8	12.5	13.9	14.8	23.2	21.6	27.3	24.5	20.4	30.9	19.1	16.7	21.7	16.3	23.3	25.5	13.9	20.7	18.8	13	20.5	21.2	29.9	22.5	18.8	11.3	29.7	24.4	27	26.4	22.1	21.1	20.4	18.4	34.3	20.2	27.3	16.3	13.8	16	24.9	22.4	19.5	20.1	21.6	26.8
4931	17.4	39.8	24	13.4	13.6	13.4	13.1	26.3	24.2	28.3	26.8	21.7	27.9	19.9	19.2	20.9	12.5	28.7	26.9	14.9	17.1	16.2	12.9	16.5	23.1	25.7	20.1	17.1	9.9	27.2	27.8	25.4	26.4	22.2	22.7	18.6	18.8	29	17.4	28.3	16.3	10.1	13	24.4	23.3	19	21.6	18.3	30.2
5029	20.3	29.4	20.7	20.6	24.1	20.3	-999	21.8	21.6	31.1	28.2	20.6	24.1	22.4	22.1	19.8	18.6	19.7	21.5	14.3	18.5	18.7	22.6	21.8	21.9	29.5	22.6	15.2	9.7	28.8	31.2	25	32.8	24.5	25.3	27.2	20.9	-999	22.1	28.9	21.6	13.8	8.9	33.3	22	23	16.9	16.7	24.5
5078	42	30.6	26.9	25.2	27.2	15.3	22.2	35.3	42	36.2	15	20.7	20.2	30.8	32.5	17.3	37.8	20	33	16.1	24.7	26.2	20.1	36.2	25.2	30.7	16.7	22.8	16.1	25.1	21.2	16.2	16.9	22	24.3	33.6	33.4	13.2	33.6	29.9	30.2	26.2	21.5	16.1	21.4	24.8	27.8	26.8	18.6
5100	22.7	29.6	20.1	22.8	28.3	26.1	10.3	25.3	25.5	28.3	26	22.5	25.2	23.8	23.5	21	19.7	17.8	22.9	18.4	16.3	19.4	30.1	23	25.2	28.4	27.6	20.4	10.1	25.4	30.2	24.2	35.4	25.3	23.7	24.9	19.1	23.1	20.3	23.9	20.9	14.6	12.2	30.8	22.9	20.1	15.4	15	26.1
5142	31	18.3	30.8	14.3	22.8	14	12.5	32	28.8	29.5	11.5	26.4	18.6	25.2	28.5	12.5	29.7	19.7	28	13.3	19.2	20.5	13.1	26.9	24.5	32.6	17.1	19.1	21.6	22.4	19.2	10.7	17.9	17	21.1	20.6	27.8	10.4	24.2	22.1	22.3	20.4	15.6	15	17.6	19	18.7	22.9	14.8
5158	26.8	23.3	28.3	18	22.5	17.5	14	30.5	31.8	35.3	13.8	26.1	25.7	25.8	30.8	-999	25.1	23.2	29.9	14	33.4	28	19.7	26.7	26.4	33.1	23.6	21.4	19.4	29.6	26.6	18.8	25	24	28.4	24.7	25.7	17.5	29.1	30.1	21.9	20	21.8	18.8	24.8	23.5	33.4	28.4	22.9
5349	31.3	19.3	25.8	17	24.3	13.3	8.8	25	26.8	31.8	11	22.4	20.4	24.1	29	13.2	25.4	19.5	25.9	14.1	18.5	19.8	16.1	23.4	24.8	29.9	18.9	22.2	18.7	23.6	19.7	11.8	19.2	14.5	19.6	24.3	21.8	10.5	22.8	24.2	16	22.2	17.5	15.1	15.5	16.5	19	21.2	15.4
5371	30.6	30.9	30.1	25	32	28.1	15.4	35	30.8	35	27.2	27.2	21.8	33.3	30.8	21.3	27.4	24.1	30.1	23.3	32.9	23	25.4	34.5	33.7	47.8	30.7	28.9	16.5	33.7	25.2	30.2	39	31	33.3	33	33.9	27.1	30.5	32.7	28.8	18.7	23.1	33.6	29.2	27.8	24.4	29.9	27.5
5397	16.5	24.2	17.5	14.1	9.7	13.3	10.2	17.4	24.1	26.6	21.9	17.3	18.7	14	18.6	9.7	15.4	19.2	18.1	12.3	22.6	15.9	8.4	17.3	25.2	27	14.9	14.3	12.3	30.2	22.5	19.2	19.4	20.2	21.6	15.2	20	18	18.7	25.3	17	10.6	15.9	22.6	19.1	15.3	18	20.3	19.7
5426	35	50.7	34.9	26.1	34.2	29.3	13	36.1	35	40.3	44.8	36.5	43.2	35.6	32.8	31.2	37.2	30.4	33	26	27.7	21.5	27.2	35.2	39.3	45.4	33	25	26.4	36.7	34.1	39.1	45.5	38.2	36	35.3	29.9	28.1	36.2	41	35.1	22.1	13.7	41.1	32	34.1	29.6	26.9	37
5440	18.3	32.7	18.8	15.6	13	24.2	-999	18.2	20.5	30.7	24	20.3	28.8	14.3	18.6	17	13.2	24.1	26.7	13.2	21	18.3	16.8	20.3	22.6	25.8	22.4	14.3	12	28.4	21.7	19.8	19.7	23.2	19.5	21.9	21.1	22.6	21.4	27	16.7	16.8	16.4	24.4	21.8	16.6	18.1	21.5	26.3
5490	31.8	24.3	28.3	19.8	21.8	22.8	12.3	30.8	17.5	32.8	20.2	26.3	23.5	30.5	30.6	17	30	24.3	25.4	21	22.8	16.6	25.2	27.3	32.8	38.1	25.3	26.6	17.3	28.8	24.5	20.5	27.3	19.4	28.5	24.4	25.6	19.6	29.4	24.1	26.6	20	23.8	17.6	25.6	18.6	24.9	25	23.5
5516	39.6	20.6	30.6	21.1	23.5	12.7	19.5	35	33.8	32.8	15.6	26.3	20.4	24.4	32.8	15.7	35.1	23.2	30.6	15.7	27.4	25.9	16.9	36.5	30.1	33.9	18.8	23.1	19.1	30.6	22.8	15.8	19.7	18.6	29.8	37.3	36.6	14.9	33.3	28.2	27.5	29.1	28	22.9	21.5	27.1	20.2	36.8	19.2
5546	27.5	18.5	25	17.5	21.5	14.5	11	27	27.8	29.3	12.3	-999	22.1	24.1	26.2	-999	26.9	18.6	27.4	16	22.2	25.6	15.6	23.5	25.9	31.7	21.3	19	20.6	27.1	25.8	14.5	26	22.3	23.8	20.2	23.5	13	23.4	30	15.3	19.4	19	13.9	20.7	18	28.3	27.1	20
5629	26.5	15.8	22	14	16.8	10.8	11.8	27.3	23	29.5	16.3	24.8	21.3	21	24.4	12.6	20.8	19	23.7	11.4	28.5	21.1	11.9	19.6	21.7	29	20.6	15.7	22.6	23.3	22.1	15.1	24.2	19.8	20.9	20	23.8	12.6	23.8	28.8	17.3	16	18.8	16.6	19.3	16.9	25.9	34.8	15.2
5640	30.3	24.2	25.7	22.6	23.7	16.5	11.8	28.8	33.4	27.8	10.8	26.8	22.1	27.8	38.6	13.4	28.3	21.1	29.3	10.3	25.7	31.4	17	25.2	24.7	30.4	23.1	22.1	14.9	26.2	21.6	12.3	17	15.9	27.3	32.4	32.4	20.6	30.9	31.4	25.7	28.3	26.8	20.6	21.6	30.4	28.3	27.8	25.7
5705	22.9	31.6	26.8	19.1	15.2	22.8	10.1	27.4	24.4	32.9	25.9	24.5	25.8	23.2	26.6	11.6	20.3	19.2	24.1	16.8	21.3	17.1	17.2	26.8	26.7	34.2	20.8	17.5	14.5	26.5	25.3	28.1	29.7	23.7	24	23.9	23.5	19.3	24.8	27.9	22.8	12.1	19.3	28.5	25.8	25.9	19.8	20.5	26.5
5792	38	54.8	43.3	23.3	39.4	33.3	22	43.7	38.2	42.9	54.9	39.3	52	35.6	35.5	36.8	33.3	38.2	44.7	33.6	38.9	29.7	37.8	41.9	41.6	50.9	42	33.5	22.3	53.1	40.4	34.7	41.9	50.6	49.4	34.1	34.2	-999	43.2	53.4	37.7	23.7	-999	39.8	34.8	40.1	31.5	41.9	48.6
5839	27.2	22.6	25.5	22.4	23.5	17.3	10.9	23.3	30	30.4	12.4	27.8	24.5	24.7	27.2	12.9	29.1	23.4	29.9	11	26.6	29.5	16.8	23.3	24.1	31.4	23.4	23.6	15.8	25.9	23.7	14.2	18.4	16.4	28.6	29.1	30.8	20	24.7	28.9	25.4	20.8	24.3	23.2	19.7	25.1	27.8	33.2	25.2
5856	19.4	33.2	24.7	12.4	8.1	23.7	18.4	31.3	21.3	28.4	29.7	21	27.7	14.9	21.2	6.8	12.7	28.2	31	8.6	31	18.3	9.3	20.1	25.1	37.5	24.6	9.4	12.2	31.9	20.8	25.7	15.3	29	27.2	10.7	23.9	29.9	22.7	30.2	21.8	14.7	18	19.3	22	16.7	21.2	30.4	21.8
5871	22.9	24.1	21.9	21	25.5	26.2	10.1	25	22.3	32.1	27.3	24.6	26.5	26.7	23.3	20.3	22.4	27.8	26.6	18.2	19.7	16.2	24.6	22.4	25.6	29.6	23.9	19	11.1	26.8	23.3	21.3	33.9	24.5	21.7	25.3	21.3	22.7	25.2	28.3	20.9	13.2	16.4	29.8	24	21.8	17.4	20.3	25.2
5906	14.9	28.4	19.1	14.4	18.9	21.6	9.4	20.5	20	27.1	22.9	21	26.1	21.2	20.1	17.8	17.4	20.4	24.6	14	15	13.6	16.1	19.2	19.9	27.3	19.4	17.8	10.1	27.9	20.1	20.2	26.5	19.7	18.1	19	16.3	18.1	21.1	25.7	17.6	13	11.5	24.4	19.9	18.3	19	17.7	21.2
5930	36	23	34.1	24	25	20.1	21.5	34.4	35.3	32.2	16.2	23	17.5	22.1	29.5	15.9	35.4	21.2	24.4	19.1	23.3	24.2	19	31.1	28	35.7	16.7	25.2	19.1	26.1	22.8	17	17.8	16.6	24.2	39.9	34	12.3	32.8	24.1	31.5	26.8	20.7	20.4	18.8	24.8	17.2	27	15.8
6091	39.5	25.7	30.8	28	27.4	19.5	21.6	35.4	37.6	37	13.2	34.7	27	29.1	31.5	18.2	34.2	29	36.7	15.6	39.1	42.9	20.7	32.9	37.8	34.6	27.9	27.4	19	34.8	26.8	19.9	20.9	24.7	37.6	43.7	41.1	31.4	-999	38.8	34.7	34.6	32.1	26.8	25.4	34.4	33.4	37.7	30.9
6097	-999	28.5	30.5	18.6	26.1	-999	18.8	26.2	33.1	31.9	14	22.7	18.9	22.6	28.4	18.3	29.2	23.3	32.1	13.3	24	28.6	19.5	34.9	29.4	29	18.9	22.5	22.5	24.3	22.2	13.8	19.1	22.1	28.9	33.5	33.6	12.5	29.9	24.6	30	29.1	25.4	20.5	20.3	31.3	17.6	29	13.5
6102	15.6	37.9	18.8	16.1	13.4	19.8	14.3	19.4	21.3	27.8	31.4	22.3	22.3	11.7	18.2	23.4	10.2	21.3	27	17	20.1	18.7	22.4	22.1	24.2	23.9	24.3	17.2	9.8	25.5	20.8	26.2	22.9	30.6	25.5	19.8	22.9	31.2	23	25.9	12.6	9.6	15.9	23.8	19.6	26.1	-999	20.2	29.9
6211	11.2	28.9	23.1	10.7	7.4	22.2	13.7	21.3	17.1	27.7	25.5	18.8	24.7	17.7	19.3	9.6	5.9	-999	23.7	8	23.8	17.2	13.3	22.4	24	29.8	17.9	4.9	9.3	28.5	20.1	24.2	16.6	27.2	25.3	15.2	25.6	29.4	24.3	30.2	18.4	13	17.7	16.4	18.5	15.8	21.2	25.6	21.8
[truncated: 8 more columns]

## Sheet: Tab. 3 Considered wind stations
Table 3 - Considered wind stations: List of considered wind stations of German meteorological service (data source: Deutscher Wetter Dienst (DWD, German meteorological service), Climate Data Centre (CDC), https://cdc.dwd.de/portal/202007291339/index.html, download Spring 2020), normalized area and capital weight, and vulnerability parameter
ID	Name	E	N	Area weight	Capital weight	v98% [m/s]
164	Angermünde	13.9908	53.0316	0.0136311	0.00220228	20.8
183	Arkona	13.4343	54.6792	0.00139323	9.53256e-05	27
198	Artern	11.292	51.3745	0.00692849	0.00178232	21.4
232	Augsburg	10.942	48.4254	0.00647664	0.0114701	20.2
282	Bamberg	10.9206	49.8742	0.00945137	0.00752585	17.1
298	Barth	12.7108	54.3406	0.00508341	0.000845962	22
303	Baruth	13.4996	52.0614	0.00598712	0.000898782	20.4
427	Berlin-Schönefeld	13.5306	52.3807	0.00387845	0.00476033	20.9
430	Berlin-Tegel	13.3088	52.5644	0.00470686	0.0141998	19.9
433	Berlin-Tempelhof	13.4021	52.4675	0.00154385	0.0176069	19.4
591	Boizenburg	10.6878	53.3911	0.00828407	0.00344473	20.2
596	Boltenhagen	11.1908	54.0028	0.00301239	0.000825562	23.5
619	Borkum-Süderstraße	6.6703	53.5788	0.000188274	1.5718e-05	24.5
656	Braunlage	10.6021	51.7234	0.00286177	0.000796831	19.5
662	Braunschweig	10.4465	52.2914	0.010468	0.0124991	19.8
691	Bremen	8.7979	53.045	0.0134051	0.0110233	21.2
701	Bremerhaven	8.5761	53.5332	0.00790752	0.00310453	23.7
722	Brocken	10.6183	51.7986	0.00289942	0.0013966	38.8
766	Büchel (Flugplatz)	7.0595	50.1746	0.00530933	0.00430428	19.3
840	Carlsfeld	12.6114	50.4313	0.00282411	0.00177525	18.8
853	Chemnitz	12.872	50.7913	0.00564823	0.00727272	23
867	Lautertal-Oberlauter	10.968	50.3067	0.00568588	0.00397369	18.6
880	Cottbus	14.3168	51.776	0.00941371	0.00346802	18.8
891	Cuxhaven	8.7058	53.8713	0.00417969	0.00171577	22.4
953	Deuselbach	7.0541	49.7619	0.00207102	0.000636342	21.6
963	Diepholz	8.3424	52.5881	0.0123508	0.00371721	20.6
1001	Doberlug-Kirchhain	13.5747	51.6451	0.0077569	0.00177771	20.5
1048	Dresden-Klotzsche	13.7543	51.128	0.0111835	0.00995609	20.6
1078	Düsseldorf	6.7686	51.296	0.00975261	0.036248	20.5
1262	München-Flughafen	11.8133	48.3477	0.00952668	0.0531608	21.7
1270	Erfurt-Weimar	10.9608	50.9829	0.00820876	0.00484672	21.7
1303	Essen-Bredeney	6.9677	51.4041	0.0114847	0.0537551	18.9
1339	Faßberg	10.1885	52.9157	0.00809579	0.00207317	20.1
1420	Frankfurt/Main	8.5213	50.0259	0.00896186	0.0456539	19.8
1443	Freiburg	7.8344	48.0233	0.0100538	0.0118483	20
1468	Freudenstadt	8.4091	48.4537	0.00960199	0.00943358	22.8
1544	Gardelegen	11.3941	52.5129	0.00707911	0.000689294	19.5
1550	Garmisch-Partenkirchen	11.0623	47.4831	0.00252288	0.000610953	13.3
1580	Geisenheim	7.9549	49.9859	0.00843469	0.0094778	18.9
1605	Genthin	12.1601	52.3875	0.00711677	0.00190361	18.5
1612	Gera-Leumnitz	12.1289	50.8813	0.00474451	0.00315411	21.3
1639	GieÃŸen/Wettenberg	8.6439	50.6017	0.0122378	0.0120065	19.6
1684	Görlitz	14.9506	51.1622	0.00523402	0.00209513	21.3
1691	Göttingen	9.9506	51.5003	0.0119366	0.01148	19.9
1757	Greifswald	13.4056	54.0967	0.00877358	0.00148175	20.2
1766	Münster/Osnabrück	7.6969	52.1344	0.0154008	0.0171279	20.1
1963	Hallig Hooge	8.5133	54.5742	0.000979026	0.000130077	26.3
1975	Hamburg-Fuhlsbüttel	9.9881	53.6332	0.0136311	0.0375414	20.2
2014	Hannover	9.6779	52.4644	0.0129909	0.018654	20.7
2044	Harzgerode	11.1367	51.652	0.00572354	0.00160067	20.6
2171	Hersfeld, Bad	9.7378	50.8519	0.0123508	0.00589653	18.9
2252	Bertsdorf-Hörnitz	14.7457	50.899	0.0023346	0.00151691	18.1
2261	Hof	11.8761	50.3122	0.00719208	0.00612163	18.6
2290	Hohenpeißenberg	11.0108	47.8009	0.00873593	0.00515021	29.4
2303	Hohn	9.539	54.3146	0.00982792	0.00725593	21.1
2385	Idar-Oberstein	7.3264	49.6927	0.00455624	0.00251224	21.1
2483	Kahler Asten	8.4891	51.1803	0.0137064	0.00531506	25.9
2597	Kissingen, Bad	10.0792	50.2241	0.00768159	0.00485454	18.7
2638	Klippeneck	8.7549	48.1054	0.010694	0.00988131	22.8
2667	Köln-Bonn	7.1575	50.8646	0.00730504	0.0290114	19.1
2712	Konstanz	9.1901	47.6774	0.00598712	0.00687835	19.1
2773	Kümmersbruck	11.9016	49.4283	0.00666491	0.00304123	18
2794	Kyritz	12.4093	52.9363	0.0073427	0.000782413	20.8
2812	Lahr	7.828	48.3647	0.0038408	0.00535461	18
2905	Lechfeld	10.8507	48.1849	0.00975261	0.00897445	20.1
2907	Leck	8.9514	54.7903	0.00369018	0.00195085	21.8
2925	Leinefelde	10.3123	51.3933	0.00692849	0.00233745	20.1
2928	Leipzig-Holzhausen	12.4462	51.3151	0.00485748	0.00691834	17.2
2932	Leipzig/Halle	12.2396	51.4348	0.00685318	0.005159	20.7
3015	Lindenberg	14.118	52.2085	0.0101668	0.00274979	20.6
3023	Lingen	7.3081	52.5181	0.0070038	0.00343157	18.4
3028	Lippspringe, Bad	8.8388	51.7855	0.0134804	0.0109709	19.6
3032	List auf Sylt	8.4125	55.011	0.000715442	0.000283016	27.1
3086	Lübeck-Blankensee	10.6988	53.8025	0.00576119	0.00660123	19.7
3093	Lüchow	11.1374	52.9724	0.00888655	0.000906719	18.6
3098	Lüdenscheid	7.6425	51.2452	0.0112588	0.0268501	20.2
3126	Magdeburg	11.5827	52.1029	0.00722973	0.00337542	18.7
3166	Marienberg	13.1469	50.651	0.00429265	0.00217705	19.7
3167	Marienberg, Bad	7.9602	50.662	0.0103551	0.0109506	19.2
3231	Meiningen	10.3771	50.5612	0.00485748	0.00149251	19.3
3254	Meppen	7.3176	52.7156	0.00794517	0.00189017	18.7
3287	Michelstadt-Vielbrunn	9.0997	49.7176	0.00956433	0.00980175	20
3366	Mühldorf	12.5024	48.2791	0.00835938	0.00392602	20.4
3484	Neuburg/Donau	11.2096	48.7097	0.00689084	0.00682173	19
3513	Neuhaus am Rennweg	11.1344	50.5002	0.00448093	0.00132017	21.5
3552	Neuruppin	12.8072	52.9037	0.00839703	0.00109654	19.3
3623	Nörvenich (Flugplatz)	6.6602	50.8294	0.00982792	0.019709	19.5
3631	Norderney	7.1519	53.7123	0.00128027	0.000281447	24.7
3639	Nordholz (Flugplatz)	8.6583	53.7647	0.00297473	0.000535942	22.1
3660	Nürburg-Barweiler	6.8697	50.3601	0.00832172	0.00286268	19.6
3668	Nürnberg	11.0549	49.503	0.00790752	0.0267229	19.5
3730	Oberstdorf	10.276	47.3986	0.00433031	0.00291573	17
3761	Öhringen	9.5175	49.207	0.0116354	0.0107563	20.1
3811	Oschatz	13.0928	51.296	0.0073427	0.00282306	21.5
3821	Osterfeld	11.9292	51.0873	0.00561057	0.00289579	20
3946	Plauen	12.13	50.4819	0.00327597	0.00222744	19
3987	Potsdam	13.0622	52.3813	0.00538464	0.00300333	22.2
4024	Putbus	13.4771	54.3643	0.00323832	0.00067766	21.8
4104	Regensburg	12.1021	49.0424	0.00719208	0.0064462	18.7
4225	Roding-Wetterfeld	12.536	49.2195	0.00707911	0.00171404	17.1
4271	Rostock-WarnemÃ¼nde	12.0808	54.1803	0.00715442	0.00310828	23.3
4280	Roth	11.1036	49.2164	0.0054223	0.00494488	18
4336	Saarbrücken-Ensheim	7.1077	49.2128	0.00414203	0.00957567	19.6
4371	Salzuflen, Bad	8.7521	52.1042	0.0103927	0.0152213	18.9
4464	Schleiz	11.8041	50.5679	0.00459389	0.000902668	21.3
4466	Schleswig	9.5487	54.5275	0.0046692	0.00272903	21.3
4501	Schmücke	10.7693	50.6546	0.00353956	0.00137005	24.6
4625	Schwerin	11.3872	53.6425	0.0111458	0.00226369	21.4
4642	Seehausen	11.7297	52.8911	0.00813345	0.000970353	20.6
4745	Soltau	9.793	52.9604	0.00907482	0.00162518	19.6
4887	Stötten	9.8646	48.6657	0.0149113	0.0182834	24.9
4911	Straubing	12.5598	48.8275	0.00858531	0.00482469	18
4919	Strucklahnungshörn	8.8069	54.4965	0.00387845	0.000947912	26.6
4928	Stuttgart (Schnarrenberg)	9.2	48.8282	0.00707911	0.0319854	20.1
4931	Stuttgart-Echterdingen	9.2235	48.6883	0.00674022	0.0222664	19.4
5029	Tholey	7.0386	49.4738	0.00417969	0.00496002	20.8
5078	Travemünde	10.8892	53.9619	0.00489513	0.00235413	22.8
5100	Trier-Petrisberg	6.6582	49.7479	0.00628836	0.00346527	21.3
5142	Ueckermünde	14.0697	53.7444	0.00971495	0.0011114	20.1
5158	Ummendorf	11.1759	52.1601	0.00497044	0.00112214	22.9
5349	Waren (Müritz)	12.6654	53.5196	0.0171706	0.00234146	19.1
5371	Wasserkuppe	9.9428	50.4973	0.00666491	0.00348588	26.8
5397	Weiden	12.1845	49.6663	0.00820876	0.00290435	17.5
5426	Weinbiet	8.1213	49.3758	0.0100915	0.0159943	30.4
5440	Weißenburg-Emetzheim	10.9308	49.0116	0.00866062	0.00280455	18.8
5490	Wernigerode	10.7686	51.8454	0.00305004	0.00105606	23.5
5516	Fehmarn	11.0605	54.5284	0.00256053	0.00067588	23.9
5546	Wiesenburg	12.4585	52.1207	0.00512106	0.000526612	20.5
5629	Wittenberg	12.6445	51.8892	0.00779456	0.00192973	19
5640	Wittmundhafen	7.6672	53.5504	0.00670256	0.00294902	22.1
5705	Würzburg	9.9577	49.7703	0.0115224	0.00978194	21.5
5792	Zugspitze	10.9847	47.4209	0.000301239	0.000109205	38.2
5839	Emden	7.2287	53.3881	0.00530933	0.00269466	21.3
5856	Fürstenzell	13.3531	48.5451	0.00986557	0.0038252	20.9
5871	Hahn	7.2645	49.9462	0.00338894	0.00134532	20.5
5906	Mannheim	8.5585	49.5062	0.00783221	0.0298969	18
5930	Schönhagen (Ostseebad)	10.0238	54.641	0.004255	0.00562164	23
6091	Spiekeroog (SWN)	7.6721	53.7674	0.0011673	9.62776e-05	27.6
6097	Darßer Ort (SWN)	12.5014	54.4738	0.000451858	5.84533e-05	24
6102	Lindau (SWN)	9.6843	47.5396	0.00621305	0.00536243	22.4
6211	Vogtareuth (Kläranlage)	12.1735	47.955	0.011786	0.00731512	19.6

## Sheet: Tab. 4 Gumbel parameters
Table 4 - Gumbel parameters: Estimated parameters for the Gumbel distribution by station for 1.5 power of wind gust velocity [m1.5/s1.5] (without bias corrcetion of s, saample size is n=40, block size is a half hazard season)
Station ID	Completness unconsidered		Completness considered
	m	s	m	s
164	110.983	20.9164	111.064	20.9701
183	160.573	28.9284	160.974	28.8261
198	116.663	24.8808	116.71	24.8935
232	108.403	24.6168	108.532	24.6543
282	82.3417	19.4228	82.3772	19.4355
298	118.532	20.401	118.64	20.4351
303	109.585	23.0924	109.894	22.8037
427	107.381	21.9766	107.419	21.9934
430	104.355	20.0812	104.407	20.1134
433	100.51	21.0438	100.811	20.8928
591	104.129	23.1979	104.235	23.2049
596	135.99	33.3714	136.306	33.5239
619	140.299	29.549	141.443	29.2847
656	99.2003	15.7141	99.2936	15.6879
662	102.526	20.6808	102.56	20.6587
691	115.407	20.6883	115.439	20.7207
701	133.359	24.8111	133.445	24.7566
722	274.841	46.0174	275.457	46.1849
766	101.321	23.0499	103.136	22.7669
840	94.0594	16.8927	94.2569	16.86
853	128.459	25.0781	128.483	25.105
867	92.957	19.0462	93.115	19.0826
880	91.751	17.3149	91.8395	17.3635
891	125.652	26.0242	126.052	25.9111
953	120.33	19.2776	120.907	19.2546
963	114.834	20.1013	114.867	20.0533
1001	105.41	19.8356	105.545	19.9082
1048	111.923	22.9309	111.954	22.9426
1078	110.773	23.5487	110.848	23.641
1262	117.918	28.1237	118.011	28.097
1270	121.224	20.1364	121.298	20.1364
1303	97.4261	17.5387	97.46	17.5463
1339	101.571	23.2646	103.089	23.3113
1420	98.3024	20.4842	98.3119	20.4786
1443	103.964	21.5569	104.011	21.5953
1468	129.249	29.3733	129.377	29.4268
1544	99.661	17.5616	99.7614	17.5661
1550	58.2275	11.8916	58.2928	11.9723
1580	96.383	20.3401	96.568	20.2264
1605	91.9258	18.4459	92.2388	18.4958
1612	112.186	23.493	112.265	23.4712
1639	100.435	21.8323	100.565	21.8701
1684	111.639	18.7457	111.685	18.743
1691	106.948	21.5074	106.994	21.5149
1757	110.275	20.0294	110.909	20.4442
1766	106.043	22.1596	106.144	22.1551
1963	150.056	34.0229	151.072	34.0381
1975	109.259	20.8072	109.281	20.8108
2014	108.179	22.878	108.269	22.9161
2044	109.859	20.7181	110.087	20.6554
2171	96.6286	18.2771	96.7191	18.2379
2252	92.2598	17.3204	92.5016	17.4134
2261	95.8424	20.0366	95.8945	20.0332
2290	172.137	46.0604	172.518	46.3435
2303	117.637	25.6911	118.504	25.2714
2385	118.239	26.8673	118.643	27.0269
2483	150.087	25.3442	150.12	25.3387
2597	94.5528	22.7443	95.3973	22.3167
2638	138.535	29.3741	138.65	29.422
2667	99.2064	22.1665	99.2201	22.1778
2712	103.755	24.7465	103.789	24.7592
2773	93.371	23.1345	93.6917	23.4175
2794	109.173	18.7691	109.23	18.7792
2812	93.7031	20.5539	93.705	20.5571
2905	105.98	24.9897	106.232	25.1446
2907	119.516	28.6674	119.958	28.5477
2925	106.897	21.7506	106.972	21.7347
2928	84.2433	18.2953	84.5219	18.115
2932	115.679	21.2192	115.832	21.1637
3015	107.832	23.3924	107.948	23.214
3023	94.3102	18.3084	94.3382	18.3036
3028	104.368	17.6079	104.385	17.6162
3032	164.385	41.4957	164.574	41.5785
3086	100.619	21.3995	100.724	21.3776
3093	92.3062	18.4111	92.361	18.4138
3098	108.834	21.8209	108.867	21.8228
3126	91.0339	20.9714	91.1543	21.0959
3166	100	15.7818	100.034	15.7879
3167	101.405	18.4754	101.414	18.4556
3231	97.0818	25.3767	97.4555	25.0205
3254	94.9006	24.4798	95.4978	24.4081
3287	110.975	19.1487	111.005	19.1406
3366	114.105	30.2042	114.168	30.254
3484	97.7989	24.0181	98.8396	23.9355
3513	120.292	20.224	120.423	20.1979
3552	100.748	23.665	100.923	23.8393
3623	104.627	23.2435	104.708	23.2026
3631	142.431	28.5633	142.657	28.6415
3639	121.991	31.0217	122.92	31.1287
3660	102.812	19.266	103.164	19.067
3668	103.3	22.3497	103.307	22.3546
3730	77.5365	18.0875	77.6211	18.1033
3761	108.796	23.6106	108.899	23.6586
3811	114.558	22.3661	114.632	22.3948
3821	104.699	21.1845	105.071	21.2355
3946	94.9109	19.3002	95.3875	19.1834
3987	121.191	22.0586	121.215	22.0779
4024	120.459	23.6084	120.869	23.8037
4104	96.4093	20.9105	96.4093	20.9105
4225	84.8386	23.2046	86.004	23.6122
4271	129.335	30.9897	129.483	30.9939
4280	97.7391	23.3147	98.4202	23.1586
4336	110.21	24.5085	110.222	24.5159
4371	98.2041	19.5495	98.2643	19.562
4464	118.734	24.6419	119.175	24.7879
4466	116.178	26.5048	116.276	26.5199
4501	143.814	19.5076	144.307	19.4181
4625	117.312	25.5961	117.458	25.6449
4642	107.901	18.2971	107.923	18.297
4745	101.958	16.8294	102.029	16.8404
4887	158.505	31.9889	158.626	32.0006
4911	92.1693	23.1888	92.2781	23.1691
4919	158.134	36.9059	159.13	36.826
4928	105.145	28.0376	105.196	28.0432
4931	103.014	26.9461	103.042	26.9804
5029	111.966	23.7277	112.248	23.8557
5078	126.058	29.2313	126.388	29.6558
5100	118.517	20.6032	118.582	20.6157
5142	102.765	24.3642	102.822	24.3482
5158	126.459	22.3451	126.743	22.6199
5349	97.901	17.5784	98.0345	17.5512
5371	166.45	24.9427	167.443	25.0418
5397	86.7239	17.8527	86.7561	17.8319
5426	203.406	37.1329	203.539	37.2443
5440	96.5713	21.2838	96.597	21.2665
5490	128.409	23.5676	128.91	23.2123
5516	144.233	30.6066	144.273	30.6538
5546	106.632	19.1177	106.665	19.1371
5629	97.5883	22.2049	97.6677	22.1491
5640	118.819	23.3721	119.108	23.4347
5705	120.789	26.0965	120.837	26.1113
5792	296.342	44.419	296.58	44.4732
5839	117.035	21.9633	117.169	21.9748
5856	115.846	27.1625	115.888	27.2116
5871	110.847	22.36	111.026	22.4209
5906	89.3383	19.3952	89.3977	19.406
5930	128.786	28.0235	129.388	28.3241
6091	169.678	37.6484	171.09	37.3493
6097	134.979	26.7097	135.313	26.8717
6102	115.08	24.5554	115.677	24.7766
6211	102.041	24.9193	103.036	25.1744

## Sheet: Tab. 5 Half season's maxima
Table 5 - Half season's maxima: Sample of the maximum wind gust speed [m/s] from winter storms (start and end date coding of observation periods: year-month-day;original data source: Deutscher Wetter Dienst [DWD, German meteorological service], Climate Data Centre [CDC], https://cdc.dwd.de/portal/202007291339/index.html, download Spring 2020)
Station ID	19990901	20000901	20010901	20020901	20030901	20040901	20050901	20060901	20070901	20080901	20090901	20100901	20110901	20120901	20130901	20140901	20150901	20160901	20170901	20180901	20000101	20010101	20020101	20030101	20040101	20050101	20060101	20070101	20080101	20090101	20100101	20110101	20120101	20130101	20140101	20150101	20160101	20170101	20180101	20190101
	19991231	20001231	20011231	20021231	20031231	20041231	20051231	20061231	20071231	20081231	20091231	20101231	20111231	20121231	20131231	20141231	20151231	20161231	20171231	20181231	20000430	20010430	20020430	20030430	20040430	20050430	20060430	20070430	20080430	20090430	20100430	20110430	20120430	20130430	20140430	20150430	20160430	20170430	20180430	20190430
164	28	20.3	23.5	31	27.1	25.6	21.6	24.1	21.6	24.8	20.8	19.9	25.2	22.3	23.6	20.6	26.3	22.2	29.4	21.8	28.5	23.5	34.3	22	33.9	25.2	20.8	29.8	31.9	23.3	21	26.4	22.9	20.1	25.7	27.4	21.1	24.1	21.2	25.9
183	50	28	33.8	31.5	28.5	38.7	28.4	38.1	30	32.6	30.5	32.4	32.7	24.9	34.7	25.1	30.6	29	29.2	28.4	35.5	27.3	36.3	28	32.4	35.1	25.6	34.2	36.5	25.3	33.5	30.4	30.1	29.4	28.6	37.9	27.8	26.8	29.8	31.6
198	27.3	24.3	24	33	29.7	23.1	30.5	23	22.5	23.1	22.8	23.1	24.9	19.8	25	22.2	26.5	22.3	25.2	23.4	29.5	24.3	29.5	21.1	26.9	26.6	19.4	39.7	32.1	21.1	28.2	19.8	25.8	20.8	22.8	26.4	28.5	24.5	33.6	32.3
232	35.8	16.9	22.7	25.6	23.1	25.2	23.7	22.6	24.1	23.5	22.3	24.4	26.5	20.6	20.3	22.1	21.6	17.6	29	22.4	25.9	22.9	26.9	28.2	29.8	24.2	21	30.7	30.5	26.7	23.6	19.6	25.5	23.3	17.7	28.2	23.6	24	27.8	26.9
282	27.4	18.6	19.1	22.3	18.2	22.9	20.9	16.6	21.3	15.7	19.1	18.9	24.3	19.5	19.6	20.2	20	12.4	21.6	27.3	17.7	19	19.2	18.2	21.8	17.5	15.3	25.6	21.2	20.3	21.9	23.2	19.5	18.8	17.8	24.1	21.9	21.7	17.8	24.6
298	30	20.8	24.5	28	25.2	32.2	22.3	26.2	23.8	25.7	23	23	25.1	23.7	28.7	23.2	25.7	25	24.8	23.8	31.8	22.8	26.5	21	31.1	27.3	19.9	33.4	33	20.7	24	26.8	24.5	24.5	23.5	29.3	23.8	23.8	23.9	28.6
303	28.3	22.8	24.5	30	28.7	22.2	23.4	22.3	20.7	23	23.7	20.4	20.8	18.7	25.5	21.5	26.6	19.6	31.9	24.4	27.8	28	31.5	20.2	28.1	25	18.4	34.7	28.7	23	24.8	21.4	23	20.2	22	28.5	21.8	26.2	28.1	23.7
427	24.9	19.5	23.6	28.7	26.8	23.1	21.5	24.1	21.6	23.6	21.2	18.2	20.2	22	25.5	20.7	26.2	22.8	34.8	24	24.5	20.5	31.3	20.1	25.2	23.2	18.6	31	31.8	20.6	26.8	22.9	21.1	23.7	25.5	29.6	21.6	28.3	22.3	28.6
430	25.6	20.3	22.5	27.4	22.7	21.2	18	22.2	22.9	19.9	22.2	24.7	21	25.5	26.6	21.5	24.9	20.6	30.9	24.2	23.6	20.3	33.5	18.8	25.6	27.6	21	33.1	22.7	18.4	23.8	22.7	21.5	21	21.5	28.8	25	23.5	22.6	28.5
433	27.6	19.7	24.1	27.2	25.7	25	21.3	20.9	21.4	22.6	18.1	18.2	17.5	22.9	23.3	18.7	22.8	23	30.3	22.8	27.5	22.6	28.8	24.2	26.4	22.6	19.1	33.5	26.7	21.6	19.7	26.8	20.5	20.2	20.4	29.5	18.9	24.2	21.5	21.2
591	33	23.8	23.3	29	29.7	27.2	21.8	31.1	21.3	19.5	19.2	20.1	20.6	21.1	26.1	19.6	21.6	26.7	24.6	21.8	30.8	19.5	28.5	23.8	27	30.4	20.7	30.2	25.9	18.6	24.1	23.5	18.8	22.3	19.8	29.6	19.6	20.5	20.4	22.4
596	38	29.8	26.8	33.3	26.2	33.2	23.7	33.4	25.1	22.8	23.1	28.4	25.8	22.5	35.9	22.8	33.3	30.3	27.7	25.1	34	23.8	38.5	28.7	35.6	35.6	22.7	37.1	34.3	19.5	28.3	31.1	24.5	26.6	25.2	32.8	27.4	22.8	25	26.9
619	32.3	30.4	32.3	31.3	31.9	26.5	25.7	32.4	26.9	25.5	28.4	25.2	27	26	41.2	28.6	30.8	28.3	34.1	27.2	27	28.3	40.7	21.3	33.4	31.7	21	35.8	29.5	23.3	22.5	26.7	29.7	23.3	28	34.1	26	29.4	27.1	26.8
656	23.6	22.7	21.3	26.4	24.2	22	27.7	21.3	23.4	21.5	21.4	19.8	20.6	21.2	23.7	20.9	21	19.1	23.7	22.4	26.1	22.1	25.6	18.9	24.2	21.2	18.2	34.1	22.3	18.5	27.9	20.4	21.8	19.6	22.5	21.8	20.2	23	27.1	23.7
662	27.6	21	24.5	26.8	24.4	20.9	28.4	22.7	22.3	21.8	22.5	21.1	20.6	19.3	23.8	25	23.5	20.2	28.6	19.8	22.5	17.5	27.3	18.1	25.8	24.4	18.8	30.9	24.8	18.6	24	19.9	26.1	20.6	24.7	27.3	22	22.6	29.5	26.5
691	26	24.3	25.2	33	29.8	23.1	26.8	26.9	22.2	19.5	23.6	20.8	22	24	28.1	21.1	25.6	23.5	28.1	24	24.5	21	31.2	26.8	32.5	28.6	23.4	27.3	24.7	19.9	22	23.6	29.4	22.3	23.8	29.3	21.6	25.7	25.9	26.6
701	30.9	26.9	27.2	31.3	28	25.3	31.2	30.4	27.9	23.4	26.3	25.7	27.4	22.7	35.9	26.4	28.2	24.1	32	30.1	27.3	24	33.3	22.7	30	30.2	23.5	30.6	27.4	21.2	22.8	26	31	24.4	35.4	34	22.5	28	26.6	28.7
722	48.3	48.4	39	49.2	42.7	44	44.8	53.1	44.5	39.4	44	41.1	45.7	40.3	47.2	44.2	47.3	36	49.1	43.2	46.8	36.1	47.1	38	53	46.2	34	55.4	43.8	37.7	50.3	45	47.2	40.9	41.1	45	42.9	43.8	56.5	42.4
766	23.7	26.2	19.5	27.8	18	21.1	18	27.3	24.2	25.7	20.1	19.5	21.1	29	24.2	18	20.1	24.2	20.1	22.6	21.1	21.6	22.1	27.8	23.7	23.7	18	26.2	25.7	21.1	32.9	20.1	21.1	18.5	21.6	24.2	26.8	29.8	33.4	29.8
840	28.8	17.8	20.8	26	22.6	20.7	22.1	20.5	20.4	20.2	20.4	21.2	23.3	18.8	21.5	18.8	20.8	18.8	20.9	20.1	22	20.3	25	23.5	22.8	23.8	17.2	35.8	27.1	21.2	22.7	24.1	20.3	18.4	17.4	24.4	19.7	24.2	23.2	23.8
853	33.8	22.5	27.8	30.8	26	22.9	30.9	26.1	27.2	22.8	25.1	23	24.8	30.4	25.4	22.2	25.4	26.1	31.7	23.4	31	28.3	28.3	25.1	26.5	24.3	22.7	37.4	42.2	23.7	26.3	26.4	27.8	22.2	21.5	30.2	24	31.2	31.3	33.5
867	20.9	20.4	21.8	21.7	18.4	17.7	21.6	19.5	25.6	20.3	19.7	21	21.5	19.3	23.5	18	24.9	15.3	22.7	25.3	19	18.7	22.5	19	19.2	22.5	21.6	31.3	27.7	19	24.5	20.7	21.8	19.5	22.8	27	21	26.9	27.3	28.4
880	22.3	19.5	22.5	30.8	23.5	21.2	25	21	19	19.3	20.1	18.4	20.7	17.6	21.2	19.2	25	19.1	28.4	22.7	22	19.5	27.3	19.3	24	22.6	18.4	35.2	23.6	17.8	21.3	19.4	20	17.4	18.8	24.3	17.9	21.4	23.1	22.3
891	31.2	30	26.5	29.5	31.2	27.2	28.8	30.3	26.1	29.5	24.6	23.7	23.3	22.2	32.6	25	29.7	27.9	33.5	26.3	26.9	21.3	30.4	21.4	26.4	29.3	22.3	27.5	27.9	20.2	19.5	25.3	27.6	24.2	22	32.2	22.5	29.3	27	28.7
953	30.5	25.1	24.1	29.5	21.9	24.1	21.8	25.4	24.9	23.4	23.5	26.6	25.2	23.7	22.2	28.9	26.4	23.1	23.6	31.3	23.1	23.3	24.9	30.5	25.2	25.8	20.7	32.6	29.4	26	30	21.3	27.7	21.9	22.8	29.2	26.3	28.7	27.1	29.2
963	27.6	24.9	26.3	31.9	26.1	21.2	25.2	23.8	21.9	23.5	22.9	23.2	23.5	22.3	25.7	23.6	25.9	21.5	27.3	22.5	23.7	18.5	30.7	22.3	33.8	28.7	25	30.8	25.2	19.6	23.1	23.5	24.8	25.7	23.7	28.1	22.6	27	27.6	26.2
1001	26.8	21.3	25.8	31.5	27.8	23	22.8	22	20.1	21.3	20.7	21	22.4	20.3	23.1	21.2	23.1	23.8	27.4	19.7	29.8	22.5	26.3	21.8	27.3	26.1	19.9	31.9	26.1	16.9	22	21.4	22.8	22	24.6	27.6	22.2	23.9	27.7	22.9
1048	27	21.3	26.8	30.6	23.1	23.2	28.9	27.9	21	22.7	20.6	21.8	25.3	22.4	27.6	20.1	24.9	21.9	29.5	22.8	28.2	22.7	29.6	21.7	25.6	25.8	18	34.3	26.8	20.6	21.5	20.7	25.5	23.6	26.5	26.6	20.7	24.5	33.8	29.7
1078	23.7	23.9	25.1	30.8	25.3	18.9	20.7	29.3	21.1	27.2	22.3	20	24.7	23.9	24.8	20.9	25.2	23.5	23.3	21.6	22.4	20.9	26.7	24	28	22	18.2	40.3	29	22.5	29.1	19.6	24.2	21.2	25.8	28.8	25.4	25.4	32.2	30.5
1262	34.5	19.5	25	30.3	23.3	27.2	27.9	21.8	25.3	23.6	21.9	25.4	27.1	23.2	22.7	29.7	25.4	17.3	26.9	25.9	24.4	26.3	33.9	30.4	29.1	28.4	20.5	33	30.2	24.2	22.9	18.5	27.8	21.6	21.7	31.4	25.7	23.1	29.7	30
1270	26.3	21.1	24.4	31.8	27.9	22.8	31.7	24.1	23.1	22.2	22.5	23.3	26.3	23.1	27.8	22.3	29.7	22	27.4	23.6	24.6	23.2	27.9	25.3	26	24.3	22.9	33	30.3	23	27.4	24.9	24.9	21.9	24.4	32.2	27.6	28.2	36.1	29.6
1303	24.3	22.9	20.1	29.1	18.2	17.3	19.8	21.8	23.4	20.9	21.4	18.9	21.7	20.4	23	21.1	20.8	22	22.7	20.4	22.2	21.2	26.5	21.6	24.3	22.3	18.6	29	22.1	20	26.7	17.7	24.8	20.3	22.2	23.3	23.7	26.9	29.7	27.5
1339	24.7	21.1	25.7	24.2	21.1	28.3	19.5	26.2	22.1	19	20.6	23.1	18.5	22.1	23.7	20.1	27.3	25.7	27.8	19.5	22.1	17.5	32.4	21.1	31.9	27.3	16.5	30.9	24.7	17.5	21.6	20.6	23.7	21.6	26.2	26.2	23.1	24.7	23.1	25.2
1420	23.3	31.5	20.1	32.1	20.6	19.5	18.8	24.6	20.8	23.3	20.3	17.5	20.7	23.1	24.2	19.5	21.9	17.5	20.7	21.8	20.6	21.4	22.4	23.4	24.3	23.6	17.5	26.3	28.1	21.7	31.5	24	20.8	18.3	21.2	28	21.6	27.1	24	28.3
1443	36.4	20.6	25.7	23.7	23.8	24.2	21.3	28.4	24.2	23.4	23.2	21.5	24.6	20.1	23.8	18.5	19.6	17.7	24.3	23	24.4	21.6	24.5	28.4	25.7	23.7	22.1	23.9	25.9	31.4	25.5	16.2	21.6	20.9	22.5	24.6	26.6	21.3	21.1	24.9
1468	34	20.6	23.4	27.7	24.4	29.5	24	31.1	29.6	28.6	26.6	27.8	31.2	22.7	22.8	28.6	23.8	19	30.3	27.9	23.3	25.6	29.7	32.1	29.5	28.6	22.9	31.6	36.5	31.2	27.5	21.3	27.8	23.3	22.3	27.9	31.8	24.8	38.4	30.1
1544	28.3	22	26	28.3	25	23.4	21.7	25.8	23.2	19.7	20.1	23	18.7	24	21.6	19.7	21.3	19.9	26.3	21.7	24.8	19.3	31	20	27.7	30.3	19.9	25.6	24.2	17.8	20	20.2	20.3	20.4	21.9	25	21	21.7	22.7	22.1
1550	18	14	14.7	22.2	13.2	19.3	14	13.4	15.1	16	16.8	13.1	14.7	15.4	18.1	16.2	20.9	13.4	17	14.5	16.3	13.4	17.7	14.7	13.9	14.6	14.7	21.1	22.2	18.1	14.5	14.1	15.3	15.7	13.5	24.4	12.8	16.2	20.1	14.8
1580	23.7	33	19.3	30.7	21.6	22.6	21.7	25.1	21.2	25.1	18.9	16.6	22	19.2	19.5	18.1	19.4	16.8	24	23.2	20.8	20	23.4	22.2	28	25.3	20	26.4	23.2	19.2	28	18.7	21.7	19.2	23.3	26.6	21.6	24.6	24.1	24.8
1605	26.3	21.8	21.5	27.8	22.6	21.2	17.6	23	19.4	21.3	21	17.4	17.2	18.7	24.3	16.8	21.6	18.6	31.7	17.3	24.8	19.8	27.8	21	24.6	23.2	17.8	25.7	24.5	18.6	21.8	20.9	23.4	19.3	19.9	23.8	23.3	21.8	22.8	20.1
1612	24	21	23	33	24.3	21.1	30.5	24.4	24.4	21.2	25.1	22.3	24.2	23.2	24.3	23.8	23.4	18.8	26.2	20.9	30	27.8	25.8	24.6	28.9	24.1	19.8	32.1	34.1	20.7	26.1	21.8	24.7	21	21.5	27.8	19.5	24.1	38.3	30.1
1639	20.9	20.3	21.1	33.7	21.7	18	21.5	21.9	21.8	20.4	25.2	19.9	23.6	22.1	27.8	17.6	23.2	17.8	21.6	22	26.6	19.1	24.3	20.9	22.9	20.5	21.5	33.8	25.9	22.8	34.3	18.4	21.6	19.8	25.2	28.5	22.5	24.9	27.6	30.6
1684	25.5	22	24	31	26.3	27.4	27.8	23.8	22.5	21.7	20.3	25.2	21.9	20.5	23.8	23	22	24.1	31	23	25.8	22.8	27.5	25	28.7	23.7	19.5	34.3	26.8	20.4	22.1	24.2	23.5	22.7	20.5	26.1	22	26.5	30.3	24.9
1691	23	20.3	23.4	29.1	24	19.9	28.8	22.8	22.1	19.1	19.8	25	23.1	23.2	24.3	20.3	25	19.4	25.1	21.8	22.8	22.5	25.5	24.5	28.9	24.1	18.1	29.1	26.5	19.5	29	20.1	23.4	25.2	23.4	32.6	23.2	23.8	30.9	32.5
1757	33.8	20.8	22.5	28.3	24.9	28.1	21.2	28.8	19.6	23.4	20.6	23.7	23.2	21.6	28.4	21.5	23.8	23.8	23.7	25.5	31	23.5	25.5	20.5	24.3	28.3	19.2	29	32	21.8	24.3	28.2	23.8	21.1	23.8	25.9	20.4	22.2	22.5	26.1
1766	25.8	23.9	22.6	28.8	27.1	20.1	20.4	23.7	21.6	23.1	24.7	19.6	24	23.5	24.2	20	26.1	18.7	23.3	21.6	23	18.1	27.7	20.3	28.8	27	19.1	30.9	24.5	19.7	24	20.2	30.9	20.7	26.6	28.5	23.1	26.6	35	24.5
1963	34.2	34.6	28.1	34.3	30.5	31.6	25.9	32.7	31	26.8	33.5	28	30.6	30.1	45	26.9	35.5	34.3	36.4	29.7	32	25.3	28.8	23	27.5	35.3	24.5	33.3	29.8	21	21.7	32.2	30.6	26	24.4	31.9	26.7	29.6	34.8	34.6
1975	30	22.4	20.2	27.6	25.7	23.7	23.4	23.4	21.6	20.3	20.5	21.6	21.1	21.7	33.4	21.3	22.5	28.6	28.3	21.3	25.4	22.3	31	25.2	27.4	27.3	19.7	29.1	25.8	19.1	19.8	22.6	29.3	22.7	24.7	29.8	24	24	22.1	27.4
2014	28.3	22.9	23	28.6	22.6	25.9	29.8	24.4	22.7	19	22.2	20.7	21	18.6	24.6	22.3	26.4	20.4	31.6	20.1	27.8	19.3	31.1	21.8	28.4	24.7	22.6	31.1	25.9	18.5	22	20.2	27.2	23.9	24	30.9	22.8	22.6	29	26.4
2044	27.3	25	25.8	29	25.2	22.6	28.2	27.1	24.5	20.3	23.3	19.9	21.4	21.7	24.2	20.5	23.1	19.9	25.2	24.1	29	24.3	26.8	21	24.4	24.6	17.7	27.6	27.2	20.4	29.5	22.6	27.6	22.1	23.1	24.4	22.8	22.1	34.2	26.3
2171	22.9	21.2	19.5	29.8	22.8	19.7	23.7	20.5	23	17.5	19.9	22.4	20.3	20	21.4	22	21.6	16.2	21.6	19.6	20.3	19.6	28.9	22.6	24.5	23.3	19.4	30.7	23.8	19.4	30.2	20.3	22.7	22.5	21.3	25.2	21.4	23.1	28.3	25.6
2252	23.2	17.8	20.3	30.4	19.4	20.8	25.5	19.7	21	17.4	19.2	20.4	23.3	17.7	21.4	19.4	20.9	21.2	21.9	20.6	22.3	20.3	26.4	18	27	23.2	19	30.7	25.1	17.9	19.8	20.4	19.5	21	24.6	25.6	17.6	22.9	25.3	25
2261	24.8	18.9	23.3	27.4	23.8	22.2	24.1	20.8	20.1	19.8	19.8	22.4	21	17.2	24.5	20.3	24.9	15.8	28.1	18.7	22.4	21.3	27.8	24.7	24.7	24.5	17.2	32	23.3	20.4	20.1	22	19.4	20.1	18.8	26.3	22.5	23.6	22.4	25
2290	48.4	30.5	37.3	38.5	38.3	40.5	37.8	30.9	35.3	31.4	24.7	32	27.2	28.3	27.9	29.1	33.6	24.4	32.8	32	38	33.5	37.3	43.2	39.2	41.5	29.9	45.1	40.9	36.6	24.4	23.5	30.8	26.7	24.3	42.5	31.4	28.5	37.1	33.3
2303	30.9	24.2	22.1	28.3	21.1	29.8	29.3	30.3	22.1	20.6	22.6	23.1	24.2	20.6	28.3	22.6	29.8	30.4	28.8	25.2	31.4	21.6	29.8	22.1	28.3	31.9	19.5	29.8	29.8	20.6	20.6	29.8	23.1	23.1	22.6	36	24.7	24.2	26.8	24.2
2385	38.6	30.3	24.2	29.3	25.7	24.2	23.1	25.7	26.2	26.5	24.2	24.7	22.6	21.6	20.6	21.1	20.6	19	22.8	28.3	26.7	24.2	25.7	30.9	28.8	26.2	19.5	31.9	30.9	27.8	35	20.6	27.8	23.1	21.1	26.2	22.1	29.8	29.8	32.4
2483	30.4	31.5	27	36.6	27.5	29.8	27.9	28.6	28.8	26.2	26.2	26	25.9	24.2	30.8	27	29.7	25.7	31.6	29.6	33.8	26.8	29.7	30.1	35.7	30.5	24.4	37.9	35.5	25.1	34.9	29.6	32.3	26.3	25.6	35.1	28.8	30.9	39.5	35.9
2597	22.8	17.2	17.2	26.4	20.6	16.5	25.2	23.7	21.2	20.2	19.1	23	24	24	22	22.1	24.4	16	20.9	21.5	18.7	18.7	17.5	19	18.8	30.1	20	31.6	31.2	20.2	27.4	20.1	23.1	25	21.2	25.2	21.6	27	28.4	26.4
2638	42.8	25.8	27.5	33.5	27.5	28.5	19.5	29.6	28.2	30.4	23.4	29	33.7	29.1	26.9	31.8	26	23.2	29.7	26.9	26	26.4	30.7	38	32.2	27.1	23.2	35.5	33.4	31.2	27.8	23.5	27.6	24.2	22.3	30	26.3	28.2	30	30
2667	24.2	21.2	21.9	30.4	21.5	17.5	21	21.3	24	30	17.8	19.4	23.8	19.7	26.6	18.3	21.3	18.7	22.6	20.1	25.8	20	26.8	21.1	24.6	22.1	18.5	35.5	27.9	19.1	24.9	18.9	24.4	20.3	21.3	26.8	24	23	31.9	28.8
2712	30.7	16.6	23.6	23.3	21.4	24.7	22.6	20.9	26.3	19.3	23.2	24.3	26.2	19.2	19.3	24.8	21.1	19.8	24.2	41.3	20.3	20.3	23.3	30	25.6	23.2	19.2	26.3	27.3	24.7	22.8	15.8	25.3	23.4	23.3	25.3	27.5	26.7	25	25
2773	27.8	22.1	19	29.3	25.2	22.6	22.1	18.5	20.6	20.1	17	15.9	20.1	21.1	19.5	20.1	25.2	22.1	26.2	21.6	21.9	23.1	22.6	23.1	22.1	22.6	20.1	30.9	32.4	19.5	17.5	15.4	21.1	18.5	16.5	26.2	24.2	29.8	22.1	27.3
2794	29.5	21	26.3	30.3	26.3	24.7	22.9	26.4	21.6	21.7	23.8	21.4	20.3	21.3	27.4	24.3	21.9	23	24.2	23.2	26.5	25.5	34.5	21.2	29.3	27	21.4	29	27.4	18.6	23	25.6	21.7	20.1	22.5	26.6	21.9	22.7	21.7	23.1
2812	39.9	22.1	18	22.9	19.9	20.8	17.1	21.5	24.7	23	18.3	19.5	25.3	18.9	18.8	18	18.4	17.3	24.8	22.3	20.1	22	24.5	24.3	23.6	19.8	21.4	22.6	21.3	28.5	22.7	16.2	20.5	19.4	26.2	25.8	23.8	25.1	25	24.9
2905	33.4	17.5	25.2	26.2	24.7	25.2	26.7	17	23.2	24.7	20.6	23.7	24.2	18.5	20.1	23.7	24.7	17	27	24.4	25.7	20.1	27.8	26.2	25.7	26.2	20.1	28.8	27.8	24.7	21.6	19.5	25.7	21.1	20.6	30.9	25.7	23.7	27.4	26.1
2907	37.7	27.9	21.7	29.6	24.9	21.6	21.1	31.6	25.1	23.5	27.6	23.9	25.1	24.7	33.1	26.5	25.7	26.2	31.5	22.7	27.2	20.7	33.6	20	27.7	32.8	16.9	29.4	28.2	20.2	20.1	25.4	26.7	26.1	24.6	28.5	28.7	26	24.7	27.1
2925	28.3	24.5	24	32.8	26.3	21.1	26.2	25.2	24.2	22.1	20.6	22.9	21.6	20.6	23.3	20.4	24.1	20.2	21.5	21.7	26	22.8	29.5	20.1	26.8	25.7	17.3	32.5	26.8	18.7	26.5	20.9	23.9	20.4	27.7	25.4	20.4	25.9	28.6	26.3
2928	24.8	18.3	21.8	29	23.5	21	19.1	20.1	18.5	17.2	18.1	17.2	20	15.5	19.7	17.7	17.4	17	23.9	17.1	22.5	24.3	27	20	23.3	20.2	16.3	24.7	24.2	17.7	21	19.9	18.5	17.9	16.7	25.2	18.1	21.3	27.4	26
2932	23.8	20	23.9	32.2	29.2	26.3	30.9	27.1	22.6	22.4	23.4	23.5	23.8	21.3	25.5	23.5	23.9	21.3	29.5	22.1	25.6	22	25.1	22.6	25.5	26.3	20.4	31	27.9	21.2	27.4	21.8	22.5	23	22.8	32.3	25.7	25.9	35.7	34.3
3015	27.8	21.8	22.8	28.8	31.5	27.3	21.9	24	24.2	21.4	21.5	20.2	23.6	18.6	27.1	21.2	24.9	17.5	32.6	22	28.8	23.5	29	18.9	27.4	27.3	20.7	33	29.1	19.9	26	23.5	23.5	23	20.5	28.9	21.4	25	21.5	23.1
3023	22.8	23.2	22.7	27.1	21.1	18.5	16.4	20.9	21.1	19	20	19.9	21.8	20.6	28.5	19.5	22.6	20.4	23.3	19.1	22	17.5	25.5	18.3	25.3	27	20.7	32.6	24.1	17.8	22	20.9	23.7	19.9	20.6	25.7	19.4	24.4	26.7	23.1
3028	22.9	22.9	24.7	28	23.1	23.4	25.7	25.8	18.5	20.1	24.6	21.5	20.2	20.1	24	23.8	22.8	19.7	22.8	20	22.1	22.2	25.6	21.1	28.3	22.9	20.5	29.7	25.5	21.3	24.9	19.3	27.9	22.2	22.6	26.8	21.7	21.1	30.9	29.5
3032	51	34.1	29.5	34.6	35	35.3	30.1	32.8	33.4	28.2	32	27.9	35	30.2	43.7	32.1	36.8	31.9	39.5	27.6	38.1	24.9	37.5	25	31.9	41.1	24.8	36	32.8	22	21.3	30.8	33.6	29.8	28.1	34.3	32.8	34.3	26.3	32.7
3086	29.9	21.9	19.5	26.2	19.7	20.5	18.3	26.9	21.9	19.4	22	24.6	22.2	22.5	28	19.7	20.6	20.7	24.8	19	23.7	17.4	31	23.1	25.2	28.4	20.2	30.6	27.9	17.9	22.7	25.1	24.1	32.2	21.7	26.4	23.3	20.8	20.4	21
3093	24.6	22.9	24.5	25.2	22.8	21	16.5	22.4	18.4	16.6	19.2	19.3	18.5	20.6	25.3	19.6	24.1	18.7	25.4	20.7	24.9	19	27.4	20.2	23.8	25	17	27.9	24.4	17.4	19.7	20.6	21.8	19.9	22.4	24.6	20.5	23.4	21.8	23.7
3098	23.7	22.5	23.6	33.9	21.7	19.6	22.5	27.2	21.1	19.8	23.4	21.7	22	22	21.1	24	25.3	20.4	26.1	22	25.5	21	29.4	25.8	26.1	21.3	26.1	34.8	27	17.8	25.2	21.8	24	20.7	25.2	27.4	22.8	30.3	30.7	31.3
3126	26.3	20.8	25	28.5	24.4	21.2	22.2	22.5	20.1	16.8	19.4	18.1	22.1	16.4	22	18.3	21.5	19	27.1	18.7	25	22.5	26.3	21.4	24.5	25	15.6	28.9	23.2	17.3	21	17.3	22.7	17.6	18.7	25.7	19.3	19.7	27.2	23.4
3166	24.5	21	21.3	32.3	22.4	20.8	19.9	22	19.9	20.1	21.4	21.5	23.2	20.2	22.1	19.1	24.2	19	25	25.2	24.3	24	27.5	23.4	24.7	23.1	19.2	30	26.4	24.3	21.4	19.7	22.6	19.8	19.9	22	19.5	24.4	25.2	25.8
3167	25.4	26.9	20.3	26.8	21.6	21.1	20.5	26.1	26	21.9	24.7	21	21.7	19.8	25.1	22	19.6	23.4	21.7	20.5	23	21.5	24.4	20	23.5	23.8	17.9	32.5	24.5	19.2	29.9	17.5	22	19.9	24	24.5	23.8	26.6	26	24
3231	24	18.8	25	29.3	21.9	19.8	30	23.9	21.2	18.7	18.3	21	20	15.4	21.9	19.9	24.4	13.8	22.8	19.1	25.8	23.5	26	24.8	23.8	27.4	19.6	29.7	29.5	20.8	28.3	20.4	21.7	19.6	21	25.3	20.7	22.3	29.1	27
3254	24.1	21.5	24	27	20.2	18.5	20	27.8	21.7	19.1	20.1	23.2	20.3	25.9	28.9	20.4	25.6	14.9	20.6	21.1	20.5	19.2	27.8	15.3	25.5	28.3	17.7	30.9	23.7	18.5	20.8	20.5	27	21.7	24.4	25.2	22.7	15.9	27.3	24.2
3287	27.7	27	22.4	28.1	24.4	24	24.6	23.6	22.9	23	21.9	24.4	24.1	20.1	24.5	22.9	24.4	18.7	21.4	27.2	23.4	21.7	25	25.3	26.9	24	18.9	31.6	29.2	24.8	26.6	20.4	26.5	21.4	20.8	26.7	25.7	28.8	25.6	25.6
3366	33.2	17.1	22.5	27.3	23.3	27.6	28.2	19.2	26.1	23.5	21.4	19.5	28	23.2	21.2	26.8	25.7	17.1	35.1	24.6	23.1	24.6	26	26.8	28	29.9	22.4	38.3	38.4	23.5	26.5	18.7	28.2	24.7	23.9	31.5	23.8	21.7	24.9	29.1
3484	35	17	20.6	29.8	21.1	20.1	19.5	20.1	20.1	20.1	18.5	18	25.7	22.1	20.6	27.3	22.6	15.9	22.1	25.2	23.7	22.1	23.7	26.8	22.6	24.7	17	26.8	24.7	21.1	27	25	22.1	19.5	18	30.9	29.3	23.1	22.6	28.8
3513	26.5	21.8	27.3	30.3	25.3	22.7	28.8	26	26.6	24.6	25.9	25.4	27.2	21.1	23.7	22.7	24.6	19.8	28.6	23.9	27.5	21.5	28	25.3	26.6	24.1	24.8	31.8	31.7	27.3	28.1	23.3	25	23.4	20.4	31.2	24.4	28.8	26.5	26.7
3552	33.3	20.5	25.3	29.3	27.6	29.5	18.8	25.8	19.2	19.8	19.5	20.3	18.6	16.6	22.4	22.5	22.5	22.5	28.7	20.9	26.8	21.3	31.5	20.3	29	25.7	18.6	29	27.3	19.9	21.5	23.6	20.9	19.6	20.3	32.6	22.9	22.4	20.1	22.9
3623	22.1	23.7	21.1	32.4	22.6	21.1	23.7	24.2	26.7	22.1	20.1	20.1	25.2	20.6	25.7	18	23.7	21.1	23.7	24.2	20.6	17.5	24.7	22.6	30.3	24.2	19	34	26.7	20.1	24.7	18	25.2	21.1	23.7	26.2	23.2	28.3	32.4	33.4
3631	31.4	27.1	32.6	34.2	32.6	27.5	30.6	34.3	32.8	30	28.7	25.2	28.3	26.4	37.9	28	31	27.3	32.5	27.6	28.5	25.5	34.4	23.7	30.2	30.4	23.2	31.3	31.6	22.7	23.7	25.1	33.1	20.5	26.2	33.6	25.7	30.2	26.5	29.8
3639	33.4	25.7	27.3	29.3	27.3	28.3	26.2	29.3	24.7	22.6	23.2	23.7	23.2	20.6	32.4	25.2	27.3	36.5	31	24.2	28.8	18.5	35.5	19.6	29.8	33.4	20.1	31.4	28.2	19.5	19.4	25.7	29.8	23.7	23.2	36.5	24.7	27.3	24.7	26.2
3660	25.3	26.2	23.6	31.6	20.5	21.3	23.4	25.2	24.1	24	21.5	25.1	19.9	21.6	22	20.4	22	17.9	22.4	19	22.5	20.3	25	23.9	25.8	24.2	20.1	34.2	28.1	20.1	27.7	19.4	24.9	18.5	22.2	26.8	23.3	21.6	29.1	22.1
3668	28.4	24.4	19.2	29.6	24.4	24.7	23.3	18.3	24	21.1	18.2	18.2	25.1	20.5	22.2	22.6	22.3	16.5	21.9	22.5	22.4	23.5	24.1	27.5	25.5	29.6	19.4	27.9	31.5	21.9	22.4	20.4	22.5	21.3	22.3	26.4	27.8	27.1	26.6	26.2
3730	30.9	18	17.6	20.5	20.9	19.5	15.1	22.5	20.7	19.5	20.3	16.6	19.9	21.8	19.4	26.6	15.3	13.9	19.4	16.5	17.6	17.5	16.2	20.9	26.7	18.1	16.7	19.8	22.9	22.8	20.8	14.8	24	15.3	17.3	21.1	19.6	16.9	21.2	21
3761	34.5	23.3	23.8	27.7	22.9	22.2	22.2	21.8	22.1	22.6	21.2	21.1	23	20.2	20.9	25.6	26	16.6	24.1	25.6	24.5	22.9	21.2	28.8	33.2	25.1	19	30.5	26.3	26	23.6	18.9	24	22.5	21.7	29.6	25.9	29.3	30.4	28.1
3811	23.8	23	25	36	27.8	27	31.4	23.1	23.4	20	21.7	21.9	25.3	19	23.5	21.7	22.6	22.2	31.1	24.4	28.3	24.8	28.3	22.4	26.2	27.4	22.2	30.4	29.2	21	23	21.2	26.7	21.6	22.7	25.9	22.4	28.8	34.2	30.2
3821	24.8	19	25.5	31	23.3	21.7	28.5	21.7	23.6	20.9	22.2	20.6	25.3	19.2	20.2	20.4	23.6	20.9	27.7	19.2	27	24	27.3	21	26.5	27.1	18.6	31.7	31.8	23.1	23.1	21	23.5	19.4	20.2	25.8	20.8	23.7	30.3	28.4
3946	23.3	21.5	20	29	25.2	22.2	32.3	20.6	24.5	16.9	20.6	22.6	21.9	23.1	20	17.9	18.3	16.4	25	18.6	22.3	26	22.3	21	22.8	20.8	19.9	31.4	30.2	22.1	21.5	22.4	20.9	18.5	19.7	24.8	19.6	23.1	19.8	23.6
3987	28.5	22	26.5	34	27.2	27.5	25.6	24.3	21	27.7	25	23.2	22	27.6	26.8	22.1	27.5	24.3	30.8	28.2	26.8	24	30.5	21.2	31.9	26.7	19.8	32.1	30.6	22.1	23.9	24.8	23.1	23.5	22.7	33.4	26.5	25.1	25.7	25.7
4024	37.3	21	25	30.8	23	33.5	25.2	34	25	24.3	23	23.1	25.5	24.5	29.7	23.1	23.2	24.2	26.1	25.3	30	23.5	32.5	26	31.3	33	19.6	29.6	29.7	20.3	23.2	28	22.9	24.7	24.9	25.4	23.4	22.8	21.8	26.2
4104	33.7	19.2	22	29.2	24.6	21.3	19.5	18.4	27.4	19.7	17.2	19.9	25.4	20.8	20.8	27.4	20.7	16.5	24.2	20	19.4	23.2	21.5	25.7	23	23.3	20	31.9	20	18	24.2	20.5	21.4	21	19.2	30.7	23.9	24.7	21.9	25.8
4225	26.9	19.2	16.3	27.4	17.5	23.9	18	17.8	21.4	21.5	15.8	16.8	20.9	16	18.2	24	20.3	12.6	21.1	21.4	25.4	21.2	18.6	28.6	22.6	18.9	17.5	28.5	34.4	19.8	19.6	21.2	18.9	18.1	21.1	23.6	18.1	21.9	19.6	30.1
4271	34	23.5	30.5	35	27.5	35.4	24.7	29.7	26.6	25.8	23.3	22	25.1	23.5	37.7	25.3	30.2	32.5	32.8	26.2	31.5	24	31.8	23.8	30.4	31.4	20.9	34.2	29.7	19.4	26.4	23.6	24.1	21.9	25.5	32.3	25.7	28.5	19.8	29.6
4280	28.8	22.1	18.5	26.7	23.1	21.6	22.6	22.6	21.1	20.1	16.5	17	21.6	19.5	19	29.5	20.7	18.6	22.9	29.4	20.1	20.6	22.6	24.2	27.3	25.6	18.5	32.9	30.4	22.6	20.1	16.5	23.7	21.1	20.5	29.9	23.9	25	25.6	25.9
4336	35.6	26.3	20	27.9	20.7	24.5	19.1	25.2	24.5	20.3	23	24.4	26.7	22.3	20.3	29	19.9	20.9	25.7	25.9	21.7	23.1	22.4	28.3	25.9	22.9	19	29.6	28.1	25.2	30.7	17	27.4	25.7	25.2	24.7	24.5	30.2	25	28.3
4371	24.9	22.9	21.3	27.2	23.6	18.6	22.4	25.4	22.6	20	20.8	21.8	19.3	19.8	23.8	21.9	23.1	18.1	23.8	18.6	23.7	19.2	26	20	25.5	27.2	20	28.8	22.4	16.2	24.3	19.7	24.2	18.8	24.1	25.5	22	24.8	28.6	26.8
4464	28.5	19.5	24.5	34.3	26.7	23.1	34.4	24.3	28.8	25.3	21.5	23.1	24.8	21	23.3	24.6	23.9	19.7	32.7	26.7	24	26.3	28.8	22	28	25.3	23.6	39.2	28	21.4	26.2	23.7	23	23.1	22.4	30.5	21.8	31.4	30.9	28.8
4466	34.5	26.5	23.4	31.7	23	31.6	21.1	29.8	22.2	26.1	25.4	22.3	23.3	21.7	35.6	26.1	28	27.4	25.9	19.5	28.9	22	32.5	19.7	29.3	31	18.9	30.1	28.1	20.6	21.1	28	25.7	24	21	29.3	23.9	21.7	23	24.4
4501	27.8	29.8	25.5	30.8	28.4	25.2	28.3	29.5	33.2	28.6	27.7	25.8	28.7	28.1	28.6	29.7	27.5	28.3	28.6	29	26.5	27.3	28	25.5	31.2	28.7	25.1	40.9	27.9	28.4	39.1	24.7	29.8	23.4	25.4	27.9	27.6	37.5	31.5	28.6
4625	34	22.5	26.8	30.3	24.7	25.8	19.4	26.3	29.5	21.3	23.5	25	21.3	25.5	31.3	23.4	28.2	23	27.9	19.8	29	21	31.8	25.5	29.9	33.5	24.6	31.7	28.9	17.9	24.4	25.3	24.2	25.1	24.4	27.7	24.3	21.8	21.6	26.3
4642	27	24.8	21.5	30.8	26.1	25.1	27.6	25.8	22.1	22	19	22.2	20.1	23	27.6	21.7	23	22.2	29.8	21.2	27.8	20.8	28.3	23.9	30.3	28.2	21.2	26.8	25.6	19.9	20.9	22.1	24.5	20.4	22.4	28	21.6	22.6	22.1	22.8
4745	26.4	23.8	22.7	25.6	25.2	21.3	25.5	25.6	22.3	21.6	20.2	20.3	21.7	22.8	23.2	20.8	24.5	22.4	28.8	20.1	21.6	18.6	31.5	23.1	26.9	24.7	19.3	26.2	24.3	18	21	21.1	25.2	20.6	20.7	28.8	21.1	20.7	22.8	23.3
4887	49	26.8	29.9	37.1	27.4	31.9	32.7	29.7	29.6	25.3	28.4	29.5	33.3	24.9	29.7	30.3	30.1	22.9	33.7	30.1	33.1	29.3	31.8	33.6	36.7	34.3	26.9	37	36	28.5	34.9	23.5	33.4	25.5	30.4	38.1	28.9	35.4	32.3	30.1
4911	34.5	16.4	20.5	27.1	19.9	23.9	24.9	17.3	21.3	19.2	17	18.2	25.4	17.8	20.9	21	20	14.3	23.3	19.3	20.2	25	25.5	25.7	24.4	23.7	21.1	28.8	25.9	21.8	22.5	22	23.4	18.1	17.4	30.7	21.2	20	20.8	25
4919	32.5	35.1	31.3	36	29.3	32	27.4	38.7	34.6	29.8	32	28.7	29.6	27.9	46.1	27.4	33.6	31.7	37.7	30.1	33.1	25.8	40.5	24.2	41.7	37	25.5	40.6	35	22.2	23.3	33.2	31.3	27.1	24.7	34.7	28.3	28.4	26.3	29.1
4928	38.7	16.9	23.5	27.3	25.8	25	20.7	22	24	19.3	18.6	20.9	25.6	26	23.6	34.3	20.3	15	23.2	22.6	23.1	20.2	23.2	24.5	30.9	25.5	20.1	29.9	29.7	27	26.4	21.4	22.6	18.8	19.1	27.3	26.2	24.9	26.8	28.7
4931	39.8	18.5	22.2	28.3	21.7	24	17.4	20.9	20.4	20.5	19.3	18.5	23.4	22.3	18.8	29	22.1	16.3	25	27.6	24	23.7	26.3	26.8	27.9	28.7	21	25.7	27.8	25.4	26.4	18	22.7	19.7	18.5	28.3	28.1	24.4	30.2	27.4
5029	29.4	24.1	20.1	31.1	20.6	21.1	21	25.2	24.6	21.5	24.4	25.9	26.8	26.3	27.2	21.3	22.6	20.2	23.3	25.7	21.3	21.5	23.9	28.2	24.1	21.5	20.3	29.5	31.2	25.6	32.8	17.8	25.3	21.8	24.5	28.9	27.7	33.3	24.5	31.8
5078	42	28.4	25.2	36.2	26	28	24.7	36.2	22.4	21.8	21.8	24.2	23.4	23	33.6	22.5	30.2	26.2	27.8	26.5	27	24.3	42	23	32.5	37.8	24.8	30.7	25.1	18.9	27.2	25.7	24.3	23.6	24.6	33.6	24.5	23.6	24.1	25.8
5100	29.6	28.3	22.7	28.3	23.3	23.4	20.6	30.1	27.6	20.5	27.5	27	25.3	26.2	26.3	24.5	21.5	26.4	21.8	27.6	21.7	25.4	25.5	26	25.2	22.9	23	28.4	30.2	24.2	35.4	19.8	23.7	22.7	24.6	23.9	28.2	30.8	26.1	26.6
5142	31	22.8	26.8	29.5	26.4	30.7	19.3	26.9	20.9	19.2	19.4	18.9	21.5	22.9	27.8	18.6	24.5	21.7	22.9	21.4	30.8	21	32	23.6	28.5	29.7	17.6	32.6	26.1	20.7	17.9	23.4	22.5	20.1	23.2	24.2	21.8	18.9	20	24.1
5158	26.8	24.5	28.3	35.3	26.1	26.9	33.4	28	26.4	27.1	24.4	22.9	24.7	23.1	25.7	22.4	26.4	23	33.4	26.4	28.3	25.5	31.8	23.7	30.8	29.9	20.7	33.1	29.6	22.2	25	22.9	28.4	22.4	22.3	30.1	25.8	25.6	28.4	29.2
5349	31.3	24.3	20	31.8	22.4	26	18.5	23.4	21	23.3	22.8	19.5	20.1	20.6	24.3	18.6	20.5	22.2	21.2	21.2	25.8	22.3	27.5	20.5	29	25.9	22.6	29.9	24.8	22.6	19.2	21.3	19.6	19.8	20	24.2	19.5	20.7	18	21.3
5371	36.6	32	29.1	35	27.2	29.2	32.9	34.5	30.7	29.6	29.6	33.1	31	33.4	33.9	29.9	28.8	28.5	31.4	33.5	30.1	29.6	35	27.4	33.3	30.1	26.1	47.8	33.7	30.2	39	25.6	33.3	29.8	27.1	32.7	31	33.6	36.8	33.2
5397	24.2	16.4	16.9	26.6	18.3	20.5	22.6	18.4	25.1	17.7	17.1	19.4	20.2	21.5	20	18	21.3	15.9	20.3	29.7	21.5	18.5	24.1	21.9	21.1	19.2	17	27	30.2	19.2	20.7	20.2	21.6	19	18.7	25.3	18.5	22.6	20.5	25.5
5426	50.7	34.2	34.6	40.3	36.5	35.5	27.7	35.2	33	31.1	35.8	36.4	38.2	33.4	35.3	31	37.6	30.1	34.1	44	34.9	31.5	36.1	44.8	43.2	37.2	29	45.4	36.7	39.1	45.5	34.6	36	33.2	30.5	41	39.7	41.1	37.4	39.4
5440	32.7	24.2	17.7	30.7	21.1	22.7	21	18.3	22.4	20.3	16.9	20.3	23.2	20.8	21.9	22.6	21.5	21.6	22.4	26.4	18.8	20.3	20.5	24	28.8	26.7	20.2	25.8	28.4	20	19.7	16.8	19.5	21.3	17.7	27	24.8	24.4	26.3	27.7
5490	31.8	27.3	29.5	32.8	26.3	26.7	22.8	27.4	27.8	22.9	26.6	26.2	26.9	23.5	27.7	27.3	26.6	21.6	25	21.7	28.8	23.5	30.8	25.4	30.6	30	20.3	38.1	28.8	21.5	27.3	29.5	28.5	24.8	27.2	29.4	25.1	25.6	31.9	25.2
5516	39.6	29.8	27.1	32.8	27.6	35	34	36.5	24.9	24	29.1	24.5	27.4	22.9	37.3	28.3	28.5	29.1	36.8	27.2	31.1	24.5	35	30.4	32.8	35.1	23.8	33.9	30.6	20.9	24.1	28.7	29.8	27	26.2	33.3	28.3	28	25.3	28.6
5546	27.5	21.5	27.3	29.3	21.3	25.2	22.2	25.6	21.7	19.3	23.3	18.8	22.3	23.7	23.5	20.9	22.7	20.3	28.3	20.3	25	21	27.8	22.8	26.2	27.4	21.2	31.7	27.1	19.9	26	20.4	23.8	21.7	22.3	30	21	25.6	29.4	22.6
5629	26.5	23	22.8	29.5	24.8	21.1	28.5	21.1	20.6	19.6	19.3	17.9	21	18	23.8	17.4	23.7	19.9	34.8	18.2	25.8	26	27.3	22.8	24.4	23.7	17	29	23.3	19.6	24.2	18.8	21.6	19	19.9	28.8	20.8	20.4	26.7	25.5
5640	30.3	24.2	24.7	27.8	26.8	25.7	25.7	31.4	23.7	23.1	21.6	21.1	23.7	23.1	32.4	26.2	25.7	28.3	30.4	21.6	25.7	20.6	33.4	22.1	38.6	29.3	20.6	30.4	26.2	22.1	21.1	22.1	27.3	22.6	21.6	31.4	24.2	26.8	25.7	26.8
5705	31.6	22.8	23.7	32.9	26.6	23.8	21.3	22.9	21.6	23.9	25.5	24.7	28.6	24.8	23.9	22.7	29.4	16.8	26.7	38	28.7	23.3	27.4	26.4	26.6	24.1	22.3	34.2	26.5	28.1	29.7	21.6	24	27.1	26.9	27.9	23	28.5	26.8	30.7
5792	54.8	47	42.5	64.8	49.7	47.8	42.5	38.3	42	47	51.7	44.4	50.6	44	40.4	48.2	47.3	44.6	50	44	43.3	43.1	43.7	54.9	52	44.7	44.2	50.9	53.1	43.1	41.9	37	49.4	41.4	47.7	53.4	48.8	48.4	48.6	40.1
5839	27.2	23.9	25.9	30.4	27.8	26.1	26.6	29.5	24	23.8	23	21.2	25.4	21.1	30.8	24.4	25.4	24.5	33.2	20.6	25.5	20.7	30	21	28.3	29.9	22.8	31.4	25.9	22.6	18.6	23	28.6	24.2	25.4	28.9	23	24.3	25.2	23.8
5856	33.2	23.7	24.8	28.4	25.9	26.6	31	20.7	24.6	21.9	20	23.2	29	22.8	23.9	29.9	25	17.2	30.4	23.4	24.7	22.9	31.3	29.7	27.7	31	20	37.5	31.9	25.7	21.3	20.8	27.2	22.5	21.1	30.2	23.9	22	22.3	27.5
5871	27.2	26.2	22.4	32.1	24.6	26.5	19.7	24.6	23.9	20.9	19.9	22.2	26.2	19.7	25.3	22.7	26.7	21.3	21.8	24.8	24.8	23.3	25	27.3	26.7	27.8	19.5	29.6	29.7	21.3	33.9	18.9	21.7	20.5	21.7	28.3	25	29.8	26.7	27.3
5906	28.4	21.6	19.9	27.1	21	19.9	15	21.7	19.4	22.7	17.1	19.9	19.8	17.1	19	18.1	18	18.8	20.6	24.6	19.1	18.8	22	22.9	26.2	24.6	18.6	27.3	27.9	22	26.5	17.1	18.8	19.4	20.1	25.7	20.8	24.4	21.2	27
5930	36	29.1	23.5	32.2	26.4	31.4	23.3	31.1	25	22.4	26.6	26.5	24.5	23.6	39.9	23.7	31.5	26.8	27	22.1	34.1	26.6	35.3	21.9	29.5	35.4	22.6	35.7	26.1	21.6	23.5	31.3	24.2	25.5	22.3	32.8	25.9	21.9	26.1	27
6091	39.5	30	31.3	37	34.7	33.3	39.1	42.9	40.7	32.2	31	28.7	29.1	26.4	43.7	31.4	34.7	34.6	37.7	28.5	30.8	28.2	37.6	25.2	31.5	36.7	30.5	37.8	34.8	26.9	22.3	30.1	37.6	25	29.2	38.8	30.4	32.1	30.9	33
6097	28.5	26.1	28.8	31.9	27.3	36.1	24	34.9	24.5	29.6	27.4	30.2	28	25.2	33.6	27.5	30	29.1	31.3	26.3	30.5	20.8	33.1	23.5	28.4	32.1	22.9	29.4	33.6	22.3	25.1	26.7	28.9	25.1	26.1	29.9	24.7	28	20.5	28.7
6102	37.9	23.1	24.7	27.8	24.7	24.5	21	22.4	24.3	22.9	26.7	20.5	30.6	27.4	26.2	31.2	21.7	17.7	27.7	24.6	20.5	25.3	25.2	31.4	27.3	27	22.9	25.7	26	28.4	24.2	18.2	25.5	20.8	23.8	26.3	24.8	23.9	29.9	27.9
6211	28.9	22.2	23.9	27.7	23.7	20.7	23.8	20.1	22.9	20	19.3	17.8	27.2	20.1	25.6	29.4	22.9	14.9	27.3	24.6	23.1	21.4	24.1	25.5	24.7	23.7	19.1	29.8	28.5	24.2	20.3	16.7	25.3	22	20.2	30.2	25.5	21.9	22.5	29.5

## Sheet: Tab. 6 Completeness
Table 6 - Half season's completeness: Share of completnes of records (1 means 100% with a record for every day of the half season, original data source: Deutscher Wetter Dienst [DWD, German meteorological service], Climate Data Centre [CDC], https://cdc.dwd.de/portal/202007291339/index.html, download Spring 2020; start and end date coding of observation periods: year-month-day)
Station	19990901	20000901	20010901	20020901	20030901	20040901	20050901	20060901	20070901	20080901	20090901	20100901	20110901	20120901	20130901	20140901	20150901	20160901	20170901	20180901	20000101	20010101	20020101	20030101	20040101	20050101	20060101	20070101	20080101	20090101	20100101	20110101	20120101	20130101	20140101	20150101	20160101	20170101	20180101	20190101
	19991231	20001231	20011231	20021231	20031231	20041231	20051231	20061231	20071231	20081231	20091231	20101231	20111231	20121231	20131231	20141231	20151231	20161231	20171231	20181231	20000430	20010430	20020430	20030430	20040430	20050430	20060430	20070430	20080430	20090430	20100430	20110430	20120430	20130430	20140430	20150430	20160430	20170430	20180430	20190430
164	1	1	0.991803	1	1	1	1	1	1	1	1	1	0.967213	1	1	1	1	0.991803	0.967213	1	1	0.925	0.975	0.991667	1	1	1	1	1	1	1	1	1	1	1	1	1	1	1	1
183	1	1	1	1	1	1	1	1	1	1	1	1	1	1	1	1	1	1	1	1	1	0.733333	0.991667	1	1	1	1	1	1	1	1	1	1	0.95	1	1	1	0.983333	0.975	1
198	1	1	0.983607	1	1	1	1	0.991803	1	1	1	0.97541	1	1	1	1	1	1	1	1	1	0.991667	0.983333	1	1	1	1	1	1	1	1	1	1	1	1	1	1	1	1	1
232	1	1	0.983607	1	1	1	1	1	1	1	1	1	1	0.991803	1	1	1	1	1	1	1	0.841667	1	1	1	1	1	1	1	1	1	1	1	1	1	1	1	1	1	1
282	1	1	1	1	1	1	1	1	1	1	1	0.97541	1	0.991803	1	1	1	1	1	1	1	0.991667	1	1	1	1	1	1	1	1	0.975	1	1	1	1	1	1	1	0.991667	1
298	1	1	0.991803	1	0.991803	1	1	1	1	1	1	1	1	1	0.991803	1	1	1	1	1	1	0.991667	0.875	1	1	0.95	0.983333	1	1	1	1	1	1	0.991667	1	1	1	1	0.991667	1
303	1	1	1	0.991803	1	1	1	1	1	1	1	1	1	0.877049	0.967213	0.942623	1	1	1	1	1	0.991667	1	0.975	0.983471	1	1	1	1	1	1	1	1	0.933333	1	1	1	1	1	1
427	1	1	1	1	1	1	1	1	1	1	0.983607	1	1	1	1	1	0.95082	1	1	1	1	0.991667	0.991667	1	1	1	1	1	1	1	1	1	1	1	1	1	1	1	1	1
430	1	1	0.918033	0.983607	1	1	1	1	1	1	1	1	1	1	1	1	0.991803	1	1	1	1	1	0.983333	1	1	1	1	1	1	1	1	1	1	1	1	1	1	1	1	1
433	1	1	1	1	1	1	1	1	1	1	1	0.934426	0.92623	0.795082	1	1	0.97541	1	1	1	1	0.991667	1	1	1	1	1	1	1	0.983333	1	1	1	1	0.966667	1	1	1	1	1
591	1	0.991803	1	0.983607	1	1	1	1	1	1	1	0.991803	0.983607	1	1	1	0.991803	1	1	0.983607	0.991736	0.991667	1	1	1	1	0.991667	1	1	1	1	1	0.983471	1	1	0.95	1	1	1	0.975
596	1	1	1	1	1	1	1	1	1	1	1	1	0.983607	1	1	0.983607	0.95082	0.95082	0.836066	1	1	1	0.991667	1	1	1	1	1	1	1	1	1	1	1	1	1	0.942149	1	0.966667	1
619	1	1	1	0.97541	1	0.991803	1	0.991803	1	1	1	1	0.729508	1	0.959016	1	0.95082	0.762295	0.737705	0.885246	1	1	1	1	1	1	0.808333	0.991667	0.991736	1	1	1	1	0.925	1	0.925	1	1	1	1
656	0.991803	1	1	0.97541	1	1	0.95082	1	1	1	1	1	1	1	1	0.991803	1	1	0.991803	1	0.991736	1	1	1	1	0.983333	0.983333	1	1	1	1	0.958333	1	0.958333	1	1	1	1	1	1
662	1	1	0.991803	1	1	1	1	1	1	1	1	1	1	1	1	1	1	1	1	1	1	0.983333	0.991667	1	1	1	1	1	1	1	1	1	1	1	0.975	1	1	1	1	1
691	0.991803	0.991803	0.97541	1	0.991803	1	1	1	1	1	1	1	1	1	1	1	1	1	1	1	1	1	0.958333	1	1	1	1	1	1	1	1	1	1	1	0.991667	1	1	1	1	1
701	1	1	1	1	1	1	0.991803	1	1	1	1	1	1	1	0.991803	0.967213	1	1	1	1	1	1	1	1	1	1	1	1	1	1	1	1	1	1	1	1	0.950413	1	1	1
722	0.991803	1	1	1	1	0.983607	1	1	1	0.983607	0.991803	0.942623	1	1	1	1	1	1	1	1	1	0.991667	1	1	0.991736	1	1	1	1	1	0.958333	1	0.876033	0.991667	0.85	1	0.975207	0.983333	1	0.975
766	1	1	1	1	0.754098	1	1	1	1	1	1	1	0.754098	0.762295	0.713115	0.598361	0.836066	0.942623	1	0.967213	1	1	1	1	1	1	1	1	1	1	1	1	1	0.991667	0.641667	0.658333	0.958678	1	0.983333	1
840	1	1	0.97541	0.991803	1	0.991803	0.991803	1	1	1	1	0.967213	1	1	0.97541	0.92623	0.991803	0.991803	1	1	0.975207	1	1	1	0.983471	0.941667	1	1	1	1	1	0.991667	0.991736	0.925	1	1	1	1	1	0.991667
853	1	1	1	1	1	0.991803	0.991803	1	1	1	1	1	1	1	1	1	1	1	1	1	1	1	1	1	1	1	1	1	1	1	1	1	1	1	1	1	1	1	1	0.941667
867	1	1	1	0.983607	0.983607	0.983607	0.967213	0.991803	1	1	1	1	1	1	1	1	1	1	0.959016	1	1	1	0.983333	0.991667	0.975207	0.908333	0.991667	1	1	0.991667	1	0.966667	1	1	1	1	1	1	1	1
880	1	1	0.991803	1	1	1	1	1	0.983607	1	0.983607	1	1	0.991803	1	0.967213	1	1	1	1	0.975207	1	0.85	1	1	1	1	1	0.983471	1	1	1	1	1	0.991667	1	1	1	1	1
891	1	1	1	1	1	1	1	1	1	1	1	1	1	1	1	1	1	1	0.918033	1	1	0.775	0.783333	1	1	1	1	1	1	1	1	1	1	1	1	1	1	1	1	1
953	0.967213	0.959016	0.942623	1	0.991803	0.967213	0.983607	0.991803	1	1	1	1	1	1	1	1	1	1	0.918033	1	0.859504	1	0.75	1	0.942149	0.941667	0.975	1	1	1	1	0.95	1	0.966667	1	1	0.917355	0.975	1	1
963	1	1	0.991803	1	1	1	1	1	1	1	1	1	1	1	1	1	0.983607	1	1	1	1	0.983333	1	1	1	1	1	1	1	1	1	1	1	1	1	0.991667	1	1	1	1
1001	1	0.97541	0.836066	1	1	1	1	1	1	1	1	1	0.991803	1	1	1	1	1	0.991803	1	1	0.966667	0.991667	1	1	1	0.983333	1	0.983471	1	1	0.983333	0.975207	1	1	1	1	1	1	1
1048	1	1	1	1	1	1	1	1	1	1	1	1	1	1	1	1	1	1	1	1	1	0.966667	0.983333	1	1	1	1	1	1	1	1	1	1	1	1	1	1	0.991667	1	1
1078	1	0.991803	1	1	1	1	1	1	1	1	1	1	1	1	1	1	1	1	1	1	1	1	0.816667	1	1	1	1	1	1	1	1	1	1	1	1	1	1	1	1	1
1262	1	1	0.959016	1	1	1	1	1	1	1	1	1	0.97541	1	1	1	1	0.983607	1	1	1	1	0.975	1	0.991736	1	1	1	1	1	1	1	0.991736	0.991667	1	1	1	1	1	1
1270	1	1	1	1	1	1	1	1	1	1	1	0.909836	1	1	1	1	1	1	0.983607	1	1	1	0.991667	1	1	1	1	1	1	1	1	1	1	1	1	1	1	1	0.983333	1
1303	1	1	1	0.991803	1	1	0.983607	1	1	1	1	1	1	0.983607	1	0.983607	1	1	1	1	1	1	0.975	1	1	1	1	1	1	1	1	1	1	1	1	1	1	1	1	1
1339	0.991803	1	1	0.95082	0.754098	0.991803	0.877049	0.991803	0.991803	1	0.97541	0.967213	0.713115	0.754098	0.901639	0.942623	1	0.991803	1	0.983607	1	1	0.95	1	0.991736	1	1	0.991667	0.958678	0.991667	0.958333	0.7	0.68595	1	0.991667	0.991667	1	1	0.975	0.991667
1420	1	1	1	1	1	1	1	1	1	1	1	1	1	1	1	1	1	1	1	1	1	1	1	1	1	1	1	1	1	1	1	1	1	0.991667	1	1	1	1	1	0.991667
1443	1	1	1	1	0.97541	0.991803	1	1	1	1	1	1	1	1	1	1	1	1	1	1	1	1	0.941667	1	1	1	1	1	1	1	1	1	1	1	1	0.975	1	1	1	1
1468	1	1	1	1	1	0.991803	1	1	1	1	1	1	0.959016	1	1	1	1	1	0.991803	0.983607	1	0.991667	1	1	1	1	1	1	1	1	1	1	1	1	0.958333	1	1	1	0.95	0.95
1544	1	1	1	1	1	1	1	0.97541	1	1	1	1	1	1	1	0.983607	1	1	1	0.909836	1	1	0.991667	1	0.991736	1	0.958333	1	1	1	1	1	1	0.983333	1	1	1	1	1	1
1550	1	1	1	0.991803	0.991803	1	1	1	1	1	1	1	1	1	1	1	1	1	0.942623	1	1	1	1	0.991667	0.983471	0.991667	1	1	1	1	1	1	1	1	1	1	1	0.966667	0.766667	1
1580	1	0.836066	1	1	1	1	1	0.991803	1	1	1	1	1	1	0.983607	0.991803	0.991803	0.909836	1	0.991803	1	0.983333	1	1	1	1	1	0.991667	1	1	1	1	1	1	0.983333	0.983333	1	1	0.991667	1
1605	0.959016	0.942623	0.737705	1	0.967213	1	0.934426	1	1	1	1	1	0.991803	1	1	1	1	1	1	1	1	0.958333	0.908333	1	0.991736	1	0.941667	1	1	1	1	1	1	1	1	1	1	1	1	1
1612	1	1	0.983607	1	1	1	0.983607	1	1	1	1	1	1	1	1	1	1	1	1	0.95082	1	0.975	1	1	1	1	0.991667	1	1	1	1	1	1	1	1	1	1	1	1	1
1639	1	1	0.893443	1	0.983607	0.991803	0.991803	1	1	1	1	1	1	1	1	1	1	1	1	1	1	1	0.95	1	0.991736	1	1	1	1	1	1	1	0.991736	1	1	0.966667	1	1	1	1
1684	0.991803	1	1	1	1	1	1	1	1	1	1	1	1	0.983607	1	1	1	1	0.991803	1	1	0.958333	0.983333	1	1	1	1	1	1	1	1	1	1	1	1	1	1	1	1	1
1691	1	1	0.991803	1	1	1	1	1	1	1	1	0.959016	1	1	1	1	1	0.983607	1	1	1	0.991667	0.991667	1	0.991736	1	1	1	1	1	1	1	1	1	1	1	1	1	1	1
1757	0.97541	1	0.959016	0.95082	1	1	0.97541	1	1	1	1	0.92623	0.655738	0.959016	1	1	0.983607	1	1	0.967213	1	1	0.55	1	1	0.841667	0.966667	0.925	1	1	1	1	1	1	1	1	1	1	1	1
1766	1	0.991803	0.893443	1	1	1	1	1	1	1	1	1	1	1	1	1	1	0.97541	1	1	1	1	0.983333	1	1	1	1	1	1	1	1	1	1	1	1	1	1	1	1	1
1963	0.991803	1	0.97541	0.918033	0.885246	0.983607	0.97541	0.97541	0.942623	1	1	1	1	1	1	1	1	1	1	0.97541	1	1	0.85	0.983333	1	0.983333	0.883333	0.925	0.991736	0.958333	1	1	0.917355	1	1	1	0.892562	0.916667	1	1
1975	1	1	0.991803	1	1	1	1	1	1	1	1	1	1	1	1	1	0.983607	1	1	1	1	1	0.975	1	1	1	1	1	1	1	1	1	1	1	1	1	1	1	1	1
2014	1	0.991803	0.918033	1	1	1	1	1	1	1	1	1	1	1	1	1	1	1	0.97541	1	1	0.991667	0.983333	1	1	1	1	1	1	1	1	1	1	1	0.966667	1	1	1	1	1
2044	1	1	0.868852	1	0.991803	0.991803	0.97541	1	1	1	1	1	1	0.97541	0.97541	1	1	1	1	0.934426	1	0.991667	0.983333	1	0.966942	0.991667	0.95	1	1	1	1	1	1	1	0.975	1	1	1	1	1
2171	1	1	1	1	0.991803	1	1	1	1	1	1	1	1	1	1	1	1	0.967213	0.967213	1	1	1	0.941667	1	0.950413	1	1	1	1	1	1	1	1	1	1	1	1	1	0.925	1
2252	0.959016	0.967213	0.967213	0.967213	1	0.97541	1	1	1	1	1	1	0.991803	1	1	1	1	0.934426	1	1	0.958678	0.958333	0.95	0.958333	0.983471	0.858333	1	0.966667	1	1	1	0.958333	1	1	1	1	1	1	1	1
2261	1	1	0.92623	1	1	1	1	1	1	1	1	1	1	1	0.991803	1	1	0.991803	1	1	1	1	0.983333	1	1	1	0.991667	1	1	1	1	1	1	1	1	1	1	1	1	1
2290	1	1	0.754098	1	1	1	1	1	1	1	1	0.92623	0.991803	0.97541	1	1	1	1	0.991803	0.991803	1	1	0.991667	1	1	1	1	1	1	1	1	1	0.983471	1	1	1	1	1	1	1
2303	1	1	1	1	0.754098	1	1	1	1	0.745902	1	0.991803	0.983607	1	0.991803	0.844262	0.92623	1	0.991803	1	1	1	1	1	1	1	1	1	1	0.975	1	1	0.991736	0.991667	0.975	0.916667	1	1	1	0.991667
2385	1	1	1	1	0.754098	0.745902	1	1	1	1	1	1	1	1	1	1	0.983607	0.991803	0.991803	1	1	0.991667	1	1	1	1	1	1	1	1	1	1	1	1	1	1	1	1	1	1
2483	1	1	1	1	1	1	1	1	1	1	1	1	1	1	1	1	1	1	1	1	1	1	0.983333	1	1	1	1	1	1	1	1	1	1	0.975	1	1	1	1	1	1
2597	1	1	0.959016	1	1	1	1	1	1	1	1	1	1	1	0.967213	1	1	1	0.97541	1	1	0.741667	0.55	1	1	1	1	1	1	1	1	1	1	1	1	1	1	1	0.983333	1
2638	1	1	0.97541	0.991803	0.991803	1	1	1	1	1	0.983607	0.983607	1	1	1	1	1	1	0.967213	0.983607	1	1	1	1	1	1	1	1	1	1	1	1	1	1	1	0.966667	1	1	0.991667	0.991667
2667	1	1	0.983607	1	1	1	1	1	1	1	1	1	1	1	1	1	1	1	1	1	1	1	0.983333	1	1	1	1	1	1	1	1	1	1	1	1	1	1	1	1	1
2712	1	1	1	1	1	1	1	1	1	1	1	1	1	0.991803	1	1	1	1	0.95082	1	1	1	1	1	1	1	1	1	1	1	1	1	1	1	1	1	1	1	1	1
2773	1	1	0.991803	1	0.754098	1	1	1	0.967213	1	1	0.991803	1	0.959016	1	1	0.991803	0.983607	0.983607	1	1	0.991667	0.983333	0.741667	0.983471	1	1	1	0.966942	0.991667	1	1	1	1	1	1	1	1	1	1
2794	1	0.97541	1	1	1	0.991803	1	1	1	1	1	1	1	1	1	1	1	1	0.95082	1	1	0.991667	1	1	1	1	1	1	1	1	0.983333	1	1	1	1	1	1	1	0.991667	1
2812	1	1	1	1	1	1	1	1	1	1	1	1	1	1	1	1	1	1	1	1	1	1	1	1	1	1	1	1	1	1	1	1	1	1	0.991667	1	1	1	1	1
2905	0.991803	1	1	1	0.754098	1	1	1	0.991803	1	1	0.97541	1	0.991803	1	0.983607	0.983607	1	1	1	1	1	1	1	0.983471	1	1	1	1	1	1	1	0.991736	0.958333	1	0.991667	1	0.983333	0.966667	1
2907	1	0.97541	0.909836	1	0.983607	0.967213	0.934426	0.991803	1	1	1	1	1	1	0.991803	1	1	1	1	0.983607	1	1	0.775	0.991667	0.966942	0.983333	0.966667	1	1	1	1	1	1	1	0.983333	1	1	1	1	1
2925	1	1	0.983607	1	1	1	0.991803	1	1	1	1	1	0.991803	1	1	1	1	1	0.942623	1	1	1	1	1	1	0.983333	0.991667	1	1	1	1	1	1	1	1	1	1	1	1	1
2928	0.983607	0.868852	0.983607	0.991803	1	0.967213	0.967213	1	1	1	1	1	1	0.860656	1	1	1	1	1	1	0.983471	0.941667	1	0.991667	1	0.991667	1	1	1	1	1	1	1	1	1	1	1	1	1	1
2932	1	1	0.991803	1	1	1	1	1	1	1	1	1	1	1	1	1	1	1	1	1	1	0.825	0.991667	1	1	1	1	1	1	1	1	1	1	1	1	1	1	1	1	1
3015	1	1	0.97541	1	1	1	1	1	1	1	1	1	1	1	1	1	1	0.934426	1	1	1	0.983333	0.991667	1	1	1	1	1	1	1	1	1	1	1	1	1	1	1	1	1
3023	0.991803	1	1	1	0.983607	0.991803	1	1	1	1	1	1	1	1	1	1	1	0.991803	1	1	1	1	1	0.991667	1	1	1	1	1	1	1	1	1	1	1	1	1	1	1	1
3028	1	0.991803	1	1	1	1	1	1	1	1	1	1	1	1	1	1	1	1	0.991803	1	1	1	0.991667	1	1	1	0.991667	0.991667	1	1	1	1	1	1	1	1	1	1	1	0.991667
3032	1	1	0.893443	1	1	1	1	0.991803	1	1	0.983607	1	1	1	0.967213	1	1	1	1	1	1	1	0.975	1	0.991736	1	1	1	1	1	1	1	1	1	1	1	1	1	1	1
3086	1	1	0.983607	1	0.983607	0.991803	0.983607	1	1	1	1	1	1	1	1	1	1	1	1	1	1	1	1	1	0.991736	0.983333	0.975	1	1	1	1	1	0.983471	1	1	1	0.983471	0.983333	1	0.991667
3093	1	1	0.991803	1	0.983607	0.991803	0.991803	1	1	1	1	1	1	1	1	1	1	1	1	1	1	1	0.966667	1	0.991736	0.966667	0.983333	1	1	1	1	1	1	1	1	0.983333	1	1	1	1
3098	1	1	1	0.991803	1	1	1	1	1	1	1	0.959016	1	1	1	1	1	1	1	1	1	1	0.991667	1	1	1	1	1	1	1	1	1	1	1	1	1	1	1	1	1
3126	1	0.967213	1	1	0.97541	1	0.909836	1	1	1	1	1	0.983607	1	1	1	1	1	1	1	1	0.983333	0.9	1	1	0.966667	1	1	1	1	1	1	1	1	1	1	1	1	1	0.975
3166	1	0.991803	1	0.991803	1	1	0.991803	0.983607	1	1	1	1	1	1	1	1	1	1	0.991803	0.991803	1	1	1	0.991667	1	0.983333	0.991667	1	1	1	1	1	1	1	1	1	1	1	1	1
3167	1	1	1	1	1	1	1	1	1	1	1	1	1	1	1	1	1	1	1	1	1	1	1	1	1	1	1	1	1	1	1	0.991667	1	1	1	1	1	1	1	1
3231	1	1	0.918033	0.991803	1	1	1	1	1	1	1	1	1	0.819672	1	1	1	1	1	1	1	0.975	0.908333	1	1	1	1	1	1	1	1	1	1	0.991667	1	1	1	0.991667	1	1
3254	1	1	1	1	0.754098	1	1	0.983607	0.942623	1	1	1	1	0.97541	0.991803	1	0.967213	1	0.983607	0.983607	1	1	1	1	1	1	0.741667	1	1	1	1	1	1	1	1	0.983333	0.991736	0.991667	1	1
3287	1	1	1	1	1	1	1	0.991803	1	1	1	1	1	0.983607	0.983607	1	1	1	1	1	1	1	0.991667	1	1	1	1	1	1	1	1	1	1	1	1	1	1	1	1	1
3366	1	1	1	0.991803	1	1	0.959016	1	1	1	1	1	1	1	1	1	1	1	1	1	1	1	0.991667	1	0.991736	1	1	1	1	1	1	1	1	1	1	1	0.991736	1	0.966667	1
3484	1	1	0.745902	1	0.737705	0.983607	1	0.991803	1	1	1	1	1	0.983607	1	0.803279	0.991803	1	0.991803	1	1	1	1	1	1	0.991667	0.75	0.983333	1	0.741667	0.991667	1	1	1	0.991667	0.933333	0.991736	1	1	1
3513	1	1	1	0.991803	0.991803	1	1	1	1	1	1	1	1	1	1	0.92623	1	1	0.991803	1	1	0.958333	1	1	0.975207	0.991667	1	1	0.958678	1	1	1	1	1	1	1	1	0.991667	1	1
3552	0.991803	1	1	1	1	1	1	1	1	1	1	0.991803	1	1	1	1	1	1	1	1	1	1	0.8	1	1	1	1	1	1	1	1	1	1	0.991667	0.991667	1	1	1	1	0.808333
3623	1	1	1	1	1	0.983607	1	1	1	0.991803	0.991803	0.983607	1	1	1	0.991803	1	1	1	1	1	1	1	1	1	1	1	0.991667	1	0.983333	0.991667	0.991667	1	1	1	1	1	1	0.991667	1
3631	1	1	0.983607	1	0.97541	1	1	1	1	1	1	1	1	1	1	1	1	0.991803	0.893443	0.909836	1	0.991667	0.975	1	1	1	0.983333	1	1	1	1	1	1	1	1	1	0.950413	1	1	1
3639	1	1	1	1	0.745902	1	0.745902	1	1	1	1	1	1	0.991803	0.97541	1	1	1	1	0.942623	1	1	1	1	1	0.741667	0.766667	1	1	1	0.991667	1	1	1	0.983333	1	1	1	1	1
3660	1	1	0.959016	1	1	1	1	0.967213	1	1	1	1	1	1	1	1	1	1	1	0.729508	1	1	0.958333	1	1	1	1	1	1	1	1	1	1	1	1	1	1	1	1	0.908333
3668	0.991803	1	1	1	1	1	1	1	1	1	1	1	1	1	1	1	1	1	1	1	1	1	1	1	1	1	1	1	1	1	1	1	0.991736	1	1	1	1	1	1	1
3730	1	1	1	1	1	0.967213	1	1	1	1	1	1	1	0.95082	1	0.991803	1	1	1	0.92623	1	1	1	1	0.991736	1	1	1	1	1	0.983333	1	1	1	1	1	1	1	1	1
3761	1	1	0.852459	1	1	1	1	1	1	1	1	1	1	1	1	1	1	1	1	1	1	1	0.983333	1	1	0.991667	1	1	1	1	1	1	1	1	1	1	1	1	1	1
3811	1	1	0.983607	1	1	0.991803	1	0.942623	1	1	1	1	0.97541	1	1	1	1	1	1	0.97541	1	1	1	1	1	1	1	1	1	1	1	1	1	1	1	1	1	1	1	1
3821	0.901639	1	1	0.983607	1	0.983607	0.942623	0.967213	1	0.909836	0.97541	0.959016	0.97541	0.983607	1	0.983607	0.934426	1	0.95082	1	0.966942	0.983333	1	1	1	0.975	0.975	0.966667	1	0.991667	1	1	1	0.966667	1	1	1	1	1	1
3946	1	1	0.704918	1	1	1	0.97541	0.991803	1	1	1	1	1	1	1	1	1	0.901639	1	1	0.991736	0.958333	0.791667	1	0.991736	0.983333	0.991667	1	1	1	0.991667	1	1	1	1	1	1	1	0.95	0.991667
3987	1	1	1	1	1	1	1	0.97541	1	1	1	1	1	1	1	1	1	1	1	1	1	1	0.991667	1	1	1	1	0.966667	1	1	1	1	1	1	1	1	1	1	1	1
4024	0.934426	0.95082	0.877049	1	1	1	1	1	1	1	1	1	1	1	0.901639	1	1	1	1	1	0.975207	0.991667	0.8	1	0.983471	0.908333	0.983333	1	1	1	0.975	1	0.983471	0.966667	0.933333	0.933333	1	1	1	1
4104	1	1	1	1	1	1	1	1	1	1	1	1	1	1	1	1	1	1	1	1	1	1	1	1	1	1	1	1	1	1	1	1	1	1	1	1	1	1	1	1
4225	0.95082	0.95082	0.95082	0.942623	0.991803	0.967213	0.959016	0.92623	0.795082	0.704918	1	1	1	0.811475	1	1	1	1	1	1	0.958678	0.958333	0.891667	0.85	0.942149	0.783333	0.941667	0.791667	0.900826	1	1	1	1	1	1	1	0.991736	1	1	0.85
4271	1	1	1	1	1	1	1	0.97541	1	1	1	0.991803	1	1	1	1	1	1	1	1	1	1	0.866667	1	1	1	1	1	1	1	1	1	1	1	1	1	1	1	0.966667	0.975
4280	1	1	1	1	0.754098	1	1	1	0.991803	1	0.942623	0.959016	0.967213	1	0.663934	1	1	1	0.991803	1	1	1	1	1	1	0.925	0.991667	1	1	1	0.991667	0.991667	0.958678	1	1	1	1	1	1	1
4336	1	1	1	1	1	1	1	1	1	1	1	1	1	1	1	1	1	1	1	0.991803	1	1	0.991667	1	1	1	1	1	1	1	1	1	1	1	1	1	1	1	1	0.991667
4371	1	0.991803	0.991803	1	0.991803	0.983607	1	1	0.991803	1	1	1	1	1	1	1	0.97541	1	1	1	1	0.991667	0.991667	1	0.983471	1	0.991667	0.983333	1	1	1	1	1	1	1	1	1	1	1	1
4464	1	0.959016	0.942623	0.918033	0.97541	0.934426	0.97541	0.991803	1	1	0.983607	0.991803	1	1	1	1	0.983607	1	0.885246	0.983607	1	0.816667	0.983333	0.983333	0.991736	0.941667	0.966667	1	1	1	1	1	1	1	1	1	1	0.966667	1	1
4466	1	0.991803	0.967213	0.991803	0.983607	0.991803	1	1	1	1	1	1	1	0.983607	1	1	1	1	0.991803	1	1	1	0.966667	1	1	1	0.991667	1	1	1	1	1	0.983471	1	1	1	1	1	1	1
4501	1	1	0.983607	0.95082	1	0.92623	0.959016	0.983607	1	1	1	1	1	1	1	0.934426	1	1	1	1	0.669421	0.991667	1	1	1	0.991667	0.891667	1	1	1	1	1	0.983471	1	1	0.991667	1	0.991667	1	1
4625	1	1	0.942623	1	1	1	1	1	1	1	1	1	1	1	0.959016	1	1	0.934426	1	0.991803	1	0.983333	0.966667	1	0.983471	0.991667	1	1	1	1	1	1	1	0.991667	1	0.991667	1	1	1	1
4642	1	1	0.97541	1	1	1	1	1	1	1	1	1	1	0.991803	1	1	1	1	1	1	1	1	1	1	1	1	1	1	1	1	1	1	1	1	1	0.991667	1	1	1	1
4745	1	1	0.991803	0.95082	0.983607	0.991803	0.991803	1	1	1	1	1	1	1	1	1	1	1	1	0.97541	1	1	1	1	1	0.983333	0.991667	1	1	1	0.966667	1	1	1	1	1	1	1	1	1
4887	1	1	0.991803	1	0.97541	1	1	1	1	1	1	1	1	0.983607	0.983607	1	0.991803	1	1	1	1	1	0.983333	1	1	0.983333	1	1	1	1	0.991667	1	1	1	0.983333	0.983333	1	1	1	1
4911	1	1	1	1	1	1	1	1	1	1	1	1	1	1	1	0.967213	0.983607	0.991803	0.991803	1	1	1	1	1	1	1	1	1	1	1	1	1	1	0.966667	1	0.991667	0.975207	0.983333	0.991667	1
4919	0.95082	0.92623	0.860656	0.967213	0.92623	0.97541	0.918033	1	1	1	1	0.991803	1	1	1	1	1	1	1	1	0.958678	0.958333	0.95	0.958333	0.983471	0.941667	0.891667	0.966667	0.991736	1	0.975	0.983333	1	1	0.933333	1	1	1	1	1
4928	0.991803	0.991803	0.959016	1	1	1	1	1	1	1	1	1	1	1	1	1	1	1	1	1	1	1	0.991667	1	1	0.991667	1	1	1	1	1	1	1	1	1	1	1	1	1	1
4931	1	1	1	1	1	1	1	1	1	1	1	1	1	1	1	1	1	1	1	1	1	1	0.933333	1	1	1	1	1	1	1	1	1	1	1	1	1	1	1	1	1
5029	0.991803	1	0.991803	0.991803	1	0.983607	0.991803	0.991803	1	1	1	1	1	0.95082	0.942623	0.983607	1	1	1	1	1	1	0.991667	1	0.950413	0.983333	0.991667	1	1	0.966667	1	1	1	1	0.8	1	1	1	1	1
5078	1	1	0.991803	1	0.754098	1	1	0.581967	1	1	1	1	1	1	1	1	1	1	1	1	1	1	1	1	1	1	0.991667	1	0.991736	1	1	1	1	1	1	1	1	1	1	1
5100	1	1	0.95082	1	1	1	1	1	0.991803	1	1	1	1	1	1	1	1	1	1	0.95082	1	1	1	1	1	0.991667	1	1	1	1	1	1	1	1	1	1	1	1	0.991667	1
5142	1	1	0.991803	1	1	1	0.991803	1	1	1	1	1	1	0.983607	1	1	1	1	1	1	1	1	0.975	1	1	1	0.983333	1	1	1	1	1	1	1	1	1	0.983471	1	1	1
5158	0.97541	1	0.827869	0.770492	0.959016	0.942623	0.942623	0.983607	1	1	1	1	1	1	0.97541	1	1	1	1	1	1	1	0.95	1	1	0.916667	0.983333	1	1	1	0.966667	1	1	1	1	1	1	1	1	1
5349	0.983607	1	1	0.983607	0.97541	0.92623	0.967213	0.967213	1	1	1	1	0.959016	1	1	0.959016	1	1	1	1	1	0.991667	1	0.991667	0.991736	1	1	1	1	1	1	1	1	1	1	1	1	1	1	1
5371	1	1	1	1	1	1	1	1	1	1	1	0.942623	0.959016	1	0.983607	0.827869	0.934426	1	0.95082	0.991803	1	1	1	1	1	1	1	0.991667	1	0.991667	1	0.975	1	0.666667	0.85	0.625	0.991736	0.983333	1	1
5397	1	1	0.967213	1	1	1	1	1	1	1	1	1	1	1	1	1	1	1	1	1	1	1	0.975	1	1	1	1	1	1	1	1	1	1	1	1	1	1	1	1	1
5426	1	1	0.983607	0.983607	1	1	1	1	1	1	1	1	1	1	1	1	0.983607	1	1	1	1	1	0.941667	0.991667	0.991736	1	1	1	1	1	1	1	1	1	1	1	1	1	1	0.933333
5440	1	1	0.983607	1	1	1	1	1	1	1	1	0.991803	1	1	1	0.991803	1	1	1	1	1	1	1	1	1	1	1	1	1	1	1	1	1	1	1	1	1	1	1	1
5490	0.983607	0.983607	1	0.991803	0.909836	1	0.92623	0.97541	1	1	1	1	1	1	1	1	0.942623	1	1	1	1	0.991667	0.966667	0.983333	1	0.975	0.908333	1	1	0.916667	1	0.991667	1	1	0.941667	1	0.983471	1	1	1
5516	1	1	0.983607	1	1	1	1	1	1	1	1	1	1	1	0.92623	1	1	1	1	1	1	1	1	1	1	1	1	1	1	1	1	1	1	1	1	0.991667	1	1	1	1
5546	1	1	0.991803	1	0.983607	0.97541	1	1	1	1	1	1	1	1	1	1	1	1	1	1	1	0.991667	0.966667	1	1	1	1	1	1	1	1	1	1	1	1	1	1	1	1	1
5629	1	1	1	1	1	0.991803	0.991803	0.983607	0.983607	1	1	1	1	1	1	1	1	1	1	1	1	1	1	1	1	1	0.975	1	1	1	1	0.975	1	1	1	1	1	1	1	1
5640	1	1	1	1	0.754098	1	1	1	1	1	1	0.95082	1	0.991803	0.942623	0.991803	1	0.983607	0.95082	1	1	1	1	1	1	1	0.991667	1	1	1	1	1	1	1	0.925	0.991667	1	1	1	1
5705	1	1	1	1	0.991803	0.97541	1	1	1	1	1	1	1	0.991803	1	1	1	1	1	1	1	1	1	1	1	1	1	1	1	1	1	1	0.983471	1	1	1	1	1	1	0.983333
5792	1	1	1	1	0.991803	1	1	1	1	1	1	1	0.991803	0.991803	0.97541	0.97541	1	1	1	0.991803	1	1	0.933333	1	1	1	1	1	1	1	1	1	0.983471	1	1	0.983333	1	0.966667	1	1
5839	1	1	0.95082	1	1	1	1	1	1	1	0.934426	1	1	1	1	0.983607	0.983607	1	1	1	1	0.983333	0.991667	1	1	1	0.983333	1	1	1	1	1	1	0.975	1	1	1	1	1	1
5856	1	1	1	1	1	1	1	1	1	1	1	1	0.983607	1	1	1	0.991803	1	1	1	1	0.991667	0.933333	1	1	1	1	1	1	1	1	1	1	1	1	1	1	1	1	0.991667
5871	1	1	1	1	0.97541	1	1	1	1	1	1	1	1	1	1	1	1	1	0.918033	1	0.991736	0.991667	0.858333	1	1	1	1	1	1	1	1	1	1	0.983333	1	1	1	1	0.983333	0.983333
5906	1	1	0.97541	1	1	1	1	1	1	1	1	1	1	1	0.97541	1	1	1	1	1	1	1	0.991667	1	1	1	1	1	1	1	1	1	0.975207	1	1	1	1	1	0.983333	0.983333
5930	0.991803	0.991803	0.901639	0.991803	0.959016	0.92623	0.967213	0.680328	0.983607	1	1	0.991803	1	1	1	1	0.991803	1	1	1	0.983471	0.958333	0.933333	1	0.958678	0.908333	0.9	0.975	1	1	1	0.983333	1	1	1	1	1	0.983333	1	1
6091	0.918033	1	1	1	1	1	1	0.97541	1	1	0.754098	1	1	0.844262	1	0.745902	0.983607	1	1	1	1	1	1	0.991667	0.983471	1	1	1	1	0.991667	0.933333	1	0.900826	0.925	0.975	0.783333	0.983471	1	1	1
6097	0.901639	0.868852	0.991803	1	1	1	0.991803	0.991803	0.991803	1	1	1	1	1	1	1	0.959016	1	0.95082	0.983607	0.876033	1	0.991667	1	1	0.991667	1	1	0.991736	0.983333	1	1	1	1	0.975	1	1	1	1	1
6102	0.95082	1	0.95082	1	1	1	1	0.991803	0.942623	1	0.97541	1	0.909836	0.991803	1	1	1	1	0.901639	1	0.892562	0.858333	1	1	1	1	1	0.933333	0.991736	0.958333	0.991667	1	1	1	0.941667	0.983333	0.975207	0.833333	0.991667	1
6211	0.991803	0.967213	1	0.983607	1	0.581967	0.95082	0.97541	1	1	1	1	1	1	1	1	1	1	1	1	0.950413	0.875	1	1	0.983471	0.808333	0.825	0.716667	0.991736	1	1	1	1	1	1	1	1	1	1	1

## Sheet: Tab. 7 Exposure distribution
Table 7 - Exposure distribution: Modelled geographical exposure distribution by assigenment of insured market portfolio [Million Euro] to wind stations per winter storm event (total sum is 15 230 952.78 Mio Euro; wind stations without wind record for current storm have 0 exposure; loss information according to table Considered storms)
Loss Information	no	no	no	no	no	no	no	yes	yes	yes	no	no	no	no	yes	no	no	no	no	no	yes	no	no	no	no	yes	no	no	no	yes	no	no	yes	no	yes	yes	yes	no	yes	yes	no	no	no	no	no	no	yes	yes	no
Station ID	Anatol, 1999	Lothar, 1999	Kerstin und Liane, 2000	Ginger, 2000	Oratia, 2000	No Name, 2000	No Name, 2001	Jennifer, 2002	Anna, 2002	Jeanette, 2002	Calvann, 2003	Jan, 2003	Gerda und Hanne, 2004	Queenie, 2004	Nina & Oralie, 2004	No Name, 2004	Erwin, 2005	Ingo, 2005	Ulf, 2005	Thorsten, 2005	Dorian (Cyrus), 2005	Britta, 2006	Vera, 2006	Klara, 2006	Franz, 2007	Kyrill, 2007	Fridtijof, 2007	Resi, 2008	Anette, 2008	Emma, 2008	Kristen, 2008	Quinten, 2009	Xynthia, 2010	Joachim, 2011	Ulli/Andrea, 2012	Christian, 2012	Xaver, 2013	Ex-Gonzalo, 2013	Elon und Felix, 2014	Niklas, 2015	Nils, 2015	Barbara, 2015	Axel, 2016	Egon, 2017	Thomas, 2017	Sebastian, 2017	Xavier, 2017	Herwart, 2017	Burglind, 2017
164	33544.8	33542.8	33542.8	33547.2	33542.8	33544.8	34529.4	33861.2	35074.9	33542.8	33542.8	33560.5	33542.8	33596.6	33542.8	33683	33542.8	33790	33678.9	33542.8	33776.5	33542.8	33542.8	33542.8	33542.8	33542.8	33542.8	33542.8	33542.8	33542.8	33542.8	33542.8	33542.8	33613	33542.8	33542.8	33709.5	33744.2	33546	33542.8	33542.8	33781.1	33546.5	33542.8	33542.8	33542.8	33839.4	33542.8	33542.8
183	1451.98	1451.9	1451.9	1452.09	1451.9	1451.98	1494.61	1465.68	1518.22	1451.9	1451.9	1452.67	1451.9	1454.23	1451.9	1457.97	1451.9	1462.6	1457.79	1451.9	1462.01	1451.9	1451.9	1451.9	1451.9	1451.9	1451.9	1451.9	1451.9	1451.9	1451.9	1451.9	1451.9	1454.94	1451.9	1451.9	1459.12	1460.62	1452.04	1451.9	1451.9	1462.21	1452.06	1451.9	1451.9	1451.9	1464.74	1451.9	1451.9
198	27148	27146.4	27146.4	27149.9	27146.4	27148	27944.9	27404.1	28386.3	27146.4	27146.4	27160.7	27146.4	27189.9	27146.4	27259.8	27146.4	27346.4	27256.6	27146.4	27335.5	27146.4	27146.4	27146.4	27146.4	27146.4	27146.4	27146.4	27146.4	27146.4	27146.4	27146.4	27146.4	27203.2	27146.4	27146.4	27281.3	27309.4	27149	27146.4	27146.4	27339.3	27149.4	27146.4	27146.4	27146.4	27386.4	27146.4	27146.4
232	174710	174700	174700	174723	174700	174710	179839	176358	182679	174700	174700	174792	174700	174980	174700	175430	174700	175987	175409	174700	175917	174700	174700	174700	174700	174700	174700	174700	174700	174700	174700	174700	174700	175065	174700	174700	175568	175749	174717	174700	174700	175941	174719	174700	174700	174700	176244	174700	174700
282	114633	114626	114626	114641	114626	114633	117998	115714	119862	114626	114626	114686	114626	114810	114626	115105	114626	115471	115091	114626	115424	114626	114626	114626	114626	114626	114626	114626	114626	114626	114626	114626	114626	114866	114626	114626	115196	115314	114637	114626	114626	115440	114638	114626	114626	114626	115639	114626	114626
298	12885.6	12884.8	12884.8	12886.5	12884.8	12885.6	13263.8	13007.1	13473.3	12884.8	12884.8	12891.6	12884.8	12905.5	12884.8	12938.6	12884.8	12979.7	0	12884.8	12974.6	12884.8	12884.8	12884.8	12884.8	12884.8	12884.8	12884.8	12884.8	12884.8	12884.8	12884.8	12884.8	12911.8	12884.8	12884.8	12948.8	12962.2	12886	12884.8	12884.8	12976.3	12886.2	12884.8	12884.8	12884.8	12998.7	12884.8	12884.8
303	13690.1	13689.3	13689.3	13691.1	13689.3	13690.1	14092	13819.2	14314.6	13689.3	13689.3	13696.5	13689.3	13711.2	13689.3	13746.5	13689.3	13790.2	13744.9	13689.3	13784.7	13689.3	13689.3	13689.3	13689.3	13689.3	13689.3	13689.3	13689.3	13689.3	13689.3	13689.3	13689.3	13718	13689.3	13689.3	13757.3	0	13690.6	13689.3	13689.3	13786.6	13690.8	13689.3	13689.3	13689.3	13810.3	13689.3	13689.3
427	72508.6	72504.4	72504.4	72513.8	72504.4	72508.6	74637.1	73192.6	75816.1	72504.4	72504.4	72542.6	72504.4	72620.6	72504.4	72807.4	72504.4	73038.7	72798.6	72504.4	73009.5	72504.4	72504.4	72504.4	72504.4	72504.4	72504.4	72504.4	72504.4	72504.4	72504.4	72504.4	72504.4	72656.2	72504.4	72504.4	72864.7	72939.7	72511.4	72504.4	72504.4	73019.5	72512.3	72504.4	72504.4	72504.4	73145.4	72504.4	72504.4
430	216290	216277	216277	216305	216277	216290	222639	218330	226156	216277	216277	216391	216277	216624	216277	217181	216277	217871	217155	216277	217784	216277	216277	216277	216277	216277	216277	216277	216277	216277	216277	216277	216277	216730	216277	216277	217352	217575	216298	216277	216277	217813	216301	216277	216277	216277	218189	216277	216277
433	268185	268169	268169	268204	268169	268185	276057	270715	280418	268169	268169	268311	268169	268599	268169	269290	268169	270146	269258	268169	270038	268169	268169	268169	268169	268169	268169	268169	268169	268169	268169	268169	268169	268731	268169	268169	269502	269779	268195	268169	268169	270075	268199	268169	268169	268169	270540	268169	268169
591	52469.6	52466.5	52466.5	52473.3	52466.5	52469.6	54009.8	52964.5	54863	52466.5	52466.5	52494.1	52466.5	52550.6	52466.5	52685.7	52466.5	52853.1	52679.4	52466.5	52832	52466.5	52466.5	52466.5	52466.5	52466.5	52466.5	52466.5	52466.5	52466.5	52466.5	52466.5	52466.5	52576.3	52466.5	52466.5	52727.2	52781.5	52471.6	52466.5	52466.5	52839.2	52472.2	52466.5	52466.5	52466.5	52930.4	52466.5	52466.5
596	12574.8	12574.1	12574.1	12575.7	12574.1	12574.8	12944	12693.4	13148.4	12574.1	12574.1	12580.7	12574.1	12594.3	12574.1	12626.6	12574.1	12666.8	12625.1	12574.1	12661.7	12574.1	12574.1	12574.1	12574.1	12574.1	12574.1	12574.1	12574.1	12574.1	12574.1	12574.1	12574.1	12600.4	12574.1	12574.1	12636.6	12649.6	12575.3	12574.1	12574.1	12663.4	12575.5	12574.1	12574.1	12574.1	0	12574.1	12574.1
619	239.414	239.4	239.4	239.431	239.4	239.414	246.442	241.672	250.335	239.4	239.4	239.526	239.4	239.784	239.4	240.4	239.4	241.164	240.372	239.4	241.068	239.4	239.4	239.4	239.4	239.4	239.4	239.4	239.4	239.4	239.4	239.4	239.4	0	239.4	239.4	240.59	240.837	239.423	239.4	239.4	241.101	239.426	239.4	239.4	239.4	0	239.4	239.4
656	12137.2	12136.5	12136.5	12138.1	12136.5	12137.2	12493.5	12251.7	12690.8	12136.5	12136.5	12142.9	12136.5	12156	12136.5	12187.2	12136.5	12225.9	12185.8	12136.5	12221	12136.5	12136.5	12136.5	12136.5	12136.5	12136.5	12136.5	12136.5	12136.5	12136.5	12136.5	12136.5	12161.9	12136.5	12136.5	12196.8	12209.4	12137.7	12136.5	12136.5	12222.7	12137.8	12136.5	12136.5	12136.5	12243.8	12136.5	12136.5
662	190385	190374	190374	190398	190374	190385	195973	192180	199069	190374	190374	190474	190374	190679	190374	191169	190374	191776	191146	190374	191700	190374	190374	190374	190374	190374	190374	190374	190374	190374	190374	190374	190374	190772	190374	190374	191320	191517	190392	190374	190374	191726	190394	190374	190374	190374	192057	190374	190374
691	167906	167896	167896	167918	167896	167906	0	169489	175565	167896	167896	167984	167896	168165	167896	168597	167896	169133	168577	167896	169066	167896	167896	167896	167896	167896	167896	167896	167896	167896	167896	167896	167896	168247	167896	167896	168730	168904	167912	167896	167896	169089	167914	167896	167896	167896	169380	167896	167896
701	47287.7	47284.9	47284.9	47291.1	47284.9	47287.7	48675.8	47733.7	49444.7	47284.9	47284.9	47309.8	47284.9	47360.7	47284.9	47482.5	47284.9	47633.3	47476.8	47284.9	47614.3	47284.9	47284.9	47284.9	47284.9	47284.9	47284.9	47284.9	47284.9	47284.9	47284.9	47284.9	47284.9	47383.9	47284.9	47284.9	47519.9	47568.8	47289.5	47284.9	47284.9	47620.8	47290.1	47284.9	47284.9	47284.9	47703	47284.9	47284.9
722	21272.7	21271.5	21271.5	21274.3	21271.5	21272.7	21897.2	21473.4	22243.1	21271.5	21271.5	21282.7	21271.5	21305.6	21271.5	21360.4	21271.5	21428.3	21357.8	21271.5	21419.7	21271.5	21271.5	21271.5	21271.5	21271.5	21271.5	21271.5	21271.5	21271.5	21271.5	21271.5	21271.5	21316	21271.5	21271.5	21377.2	21399.2	21273.5	21271.5	21271.5	21422.6	21273.8	21271.5	21271.5	21271.5	21459.6	21271.5	21271.5
766	65562.1	65558.3	65558.3	65566.8	65558.3	65562.1	67486.7	66180.5	68552.7	65558.3	65558.3	65592.8	65558.3	65663.4	65558.3	65832.2	65558.3	66041.4	65824.3	65558.3	66015	65558.3	65558.3	65558.3	65558.3	65558.3	65558.3	65558.3	65558.3	65558.3	65558.3	65558.3	65558.3	65695.5	65558.3	65558.3	65884.1	65951.9	65564.6	65558.3	65558.3	0	65565.5	65558.3	65558.3	65558.3	66137.9	65558.3	65558.3
840	27040.4	27038.8	27038.8	27042.3	27038.8	27040.4	27834.1	27295.4	28273.8	27038.8	27038.8	27053	27038.8	27082.2	27038.8	27151.8	27038.8	27238.1	27148.5	27038.8	27227.2	27038.8	27038.8	27038.8	27038.8	27038.8	27038.8	27038.8	27038.8	27038.8	27038.8	27038.8	27038.8	27095.4	27038.8	27038.8	27173.2	27201.1	27041.4	27038.8	27038.8	27230.9	27041.8	27038.8	27038.8	27038.8	27277.9	27038.8	27038.8
853	110777	110771	110771	110785	110771	110777	114029	111822	115830	110771	110771	110829	110771	110948	110771	111233	110771	111587	111220	110771	111542	110771	110771	110771	110771	110771	110771	110771	110771	110771	110771	110771	110771	111002	110771	110771	111321	111436	110781	110771	110771	111557	110783	110771	110771	110771	111750	110771	110771
867	60526.6	60523.1	60523.1	60531	60523.1	60526.6	62303.4	61097.5	63287.6	60523.1	60523.1	60555	60523.1	60620.1	60523.1	60776	60523.1	60969.1	60768.7	60523.1	60944.7	60523.1	60523.1	60523.1	60523.1	60523.1	60523.1	60523.1	60523.1	60523.1	60523.1	60523.1	60523.1	60649.8	60523.1	60523.1	60823.9	60886.5	60528.9	60523.1	60523.1	60953.1	60529.7	60523.1	60523.1	60523.1	61058.2	60523.1	60523.1
880	52824.3	52821.2	52821.2	52828.1	52821.2	52824.3	54374.9	53322.5	55233.9	52821.2	52821.2	52849	52821.2	52905.9	52821.2	53041.9	52821.2	53210.4	53035.6	52821.2	53189.2	52821.2	52821.2	52821.2	52821.2	52821.2	52821.2	52821.2	52821.2	52821.2	52821.2	52821.2	52821.2	52931.8	52821.2	52821.2	53083.7	53138.3	52826.3	52821.2	52821.2	53196.5	52827	52821.2	52821.2	52821.2	53288.2	52821.2	52821.2
891	26134.3	26132.8	26132.8	26136.2	26132.8	26134.3	26901.5	26380.8	27326.4	26132.8	26132.8	26146.6	26132.8	26174.7	26132.8	26242	26132.8	26325.4	26238.9	26132.8	26314.9	26132.8	26132.8	26132.8	26132.8	26132.8	26132.8	26132.8	26132.8	26132.8	26132.8	26132.8	26132.8	26187.5	26132.8	26132.8	26262.7	26289.7	26135.3	26132.8	26132.8	26318.5	26135.7	26132.8	26132.8	26132.8	26363.8	26132.8	26132.8
953	9692.67	9692.1	9692.1	9693.36	9692.1	9692.67	9977.19	9784.09	10134.8	9692.1	9692.1	9697.21	9692.1	9707.64	9692.1	9732.6	9692.1	9763.52	9731.43	9692.1	9759.62	9692.1	9692.1	9692.1	9692.1	9692.1	9692.1	9692.1	9692.1	9692.1	9692.1	9692.1	9692.1	9712.39	9692.1	9692.1	9740.26	9750.29	9693.03	9692.1	9692.1	9760.95	9693.16	9692.1	9692.1	9692.1	9777.79	9692.1	9692.1
963	56620	56616.7	56616.7	56624.1	56616.7	56620	58282.1	57154.1	59202.7	56616.7	56616.7	56646.5	56616.7	56707.5	56616.7	56853.3	56616.7	57033.9	56846.5	56616.7	57011.1	56616.7	56616.7	56616.7	56616.7	56616.7	56616.7	56616.7	56616.7	56616.7	56616.7	56616.7	56616.7	56735.2	56616.7	56616.7	56898.1	56956.6	56622.2	56616.7	56616.7	57018.9	56622.9	56616.7	56616.7	56616.7	57117.3	56616.7	56616.7
1001	27077.8	27076.2	27076.2	27079.7	27076.2	27077.8	27872.6	27333.2	28312.9	27076.2	27076.2	27090.5	27076.2	27119.6	27076.2	27189.3	27076.2	27275.7	27186.1	27076.2	27264.8	27076.2	27076.2	27076.2	27076.2	27076.2	27076.2	27076.2	27076.2	27076.2	27076.2	27076.2	27076.2	27132.9	27076.2	27076.2	27210.8	27238.8	27078.8	27076.2	27076.2	27268.6	27079.2	27076.2	27076.2	27076.2	0	27076.2	27076.2
1048	151650	151641	151641	151661	151641	151650	156101	153080	158567	151641	151641	151721	151641	151884	151641	152274	151641	152758	152256	151641	152697	151641	151641	151641	151641	151641	151641	151641	151641	151641	151641	151641	151641	151958	151641	151641	152394	152551	151655	151641	151641	152718	151657	151641	151641	151641	152982	151641	151641
1078	552124	552092	552092	552164	552092	552124	568332	557332	0	552092	552092	552383	552092	552977	552092	554399	552092	556160	554333	552092	555938	552092	552092	552092	552092	552092	552092	552092	552092	552092	552092	552092	552092	553248	552092	552092	554836	555407	552145	552092	552092	556014	552152	552092	552092	552092	556973	552092	552092
1262	809737	809690	809690	809795	809690	809737	833506	817375	846673	809690	809690	810116	809690	810988	809690	813073	809690	815656	812976	809690	815331	809690	809690	809690	809690	809690	809690	809690	809690	809690	809690	809690	809690	811385	809690	809690	813714	814551	809768	809690	809690	815442	809778	809690	809690	809690	816849	809690	809690
1270	73824.4	73820.1	73820.1	73829.7	73820.1	73824.4	75991.5	74520.7	77191.9	73820.1	73820.1	73859	73820.1	73938.5	73820.1	74128.5	73820.1	74364.1	74119.7	73820.1	74334.4	73820.1	73820.1	73820.1	73820.1	73820.1	73820.1	73820.1	73820.1	73820.1	73820.1	73820.1	73820.1	73974.6	73820.1	73820.1	74186.9	74263.3	73827.2	73820.1	73820.1	74344.5	73828.2	73820.1	73820.1	73820.1	74472.8	73820.1	73820.1
1303	818789	818741	818741	818847	818741	818789	842824	826512	856138	818741	818741	819172	818741	820054	818741	822162	818741	824774	822063	818741	824445	818741	818741	818741	818741	818741	818741	818741	818741	818741	818741	818741	818741	820455	818741	818741	822810	823657	818820	818741	818741	824557	818830	818741	818741	818741	825980	818741	818741
1339	31578.2	31576.4	31576.4	31580.5	31576.4	31578.2	32505.2	31876.1	33018.7	31576.4	31576.4	31593	31576.4	31627	31576.4	31708.3	31576.4	31809.1	31704.5	31576.4	31796.4	31576.4	31576.4	31576.4	31576.4	31576.4	31576.4	31576.4	31576.4	31576.4	31576.4	31576.4	31576.4	0	31576.4	31576.4	31733.3	31766	31579.4	31576.4	31576.4	31800.7	31579.8	31576.4	31576.4	31576.4	31855.6	31576.4	31576.4
1420	695392	695352	695352	695442	695352	695392	715805	701951	727113	695352	695352	695718	695352	696467	695352	698257	695352	700476	698174	695352	700196	695352	695352	695352	695352	695352	695352	695352	695352	695352	695352	695352	695352	696807	695352	695352	698807	699526	695419	695352	695352	700292	695428	695352	695352	695352	701500	695352	695352
1443	180472	180461	180461	180484	180461	180472	185769	182174	188704	180461	180461	180556	180461	180750	180461	181215	180461	181791	181193	180461	181718	180461	180461	180461	180461	180461	180461	180461	180461	180461	180461	180461	180461	180839	180461	180461	181358	181544	180478	180461	180461	181743	180481	180461	180461	180461	182057	180461	180461
1468	143691	143682	143682	143701	143682	143691	147909	145046	150245	143682	143682	143758	143682	143913	143682	144283	143682	144741	144265	143682	144683	143682	143682	143682	143682	143682	143682	143682	143682	143682	143682	143682	143682	143983	143682	143682	144396	144545	143696	143682	143682	144703	143698	143682	143682	143682	144953	143682	143682
1544	10499.2	10498.6	10498.6	10500	10498.6	10499.2	10807.4	10598.2	10978.1	10498.6	10498.6	10504.1	10498.6	10515.4	10498.6	10542.5	10498.6	10576	10541.2	10498.6	10571.7	10498.6	10498.6	10498.6	10498.6	10498.6	10498.6	10498.6	10498.6	10498.6	10498.6	10498.6	10498.6	10520.6	10498.6	10498.6	10550.8	10561.6	10499.6	10498.6	10498.6	10573.2	10499.7	10498.6	10498.6	10498.6	10591.4	10498.6	10498.6
1550	9305.94	9305.4	9305.4	9306.61	9305.4	9305.94	9579.11	9393.72	9730.43	9305.4	9305.4	9310.3	9305.4	9320.32	9305.4	9344.28	9305.4	9373.97	9343.16	9305.4	9370.23	9305.4	9305.4	9305.4	9305.4	9305.4	9305.4	9305.4	9305.4	9305.4	9305.4	9305.4	9305.4	9324.88	9305.4	9305.4	9351.64	9361.27	9306.3	9305.4	9305.4	9371.51	9306.42	9305.4	9305.4	9305.4	9387.67	9305.4	9305.4
1580	144364	144356	144356	144375	144356	144364	148602	145726	150950	144356	144356	144432	144356	144587	144356	144959	144356	145420	144942	144356	145362	144356	144356	144356	144356	144356	144356	144356	144356	144356	144356	144356	144356	144658	144356	144356	145073	145223	144370	144356	144356	145381	144372	144356	144356	144356	145632	144356	144356
1605	28995.5	28993.8	28993.8	28997.6	28993.8	28995.5	29846.6	29269	30318.1	28993.8	28993.8	29009.1	28993.8	29040.3	28993.8	29114.9	28993.8	29207.5	29111.5	28993.8	29195.8	28993.8	28993.8	28993.8	28993.8	28993.8	28993.8	28993.8	28993.8	28993.8	28993.8	28993.8	28993.8	29054.5	28993.8	28993.8	29137.9	29167.9	28996.6	28993.8	28993.8	29199.8	28997	28993.8	28993.8	28993.8	29250.1	28993.8	28993.8
1612	48042.9	48040.1	48040.1	48046.4	48040.1	48042.9	0	48496.1	50234.4	48040.1	48040.1	48065.4	48040.1	48117.1	48040.1	48240.8	48040.1	48394.1	48235.1	48040.1	48374.8	48040.1	48040.1	48040.1	48040.1	48040.1	48040.1	48040.1	48040.1	48040.1	48040.1	48040.1	48040.1	48140.7	48040.1	48040.1	48278.8	48328.5	48044.7	48040.1	48040.1	48381.4	48045.3	48040.1	48040.1	48040.1	48464.8	48040.1	48040.1
1639	182881	182871	182871	182894	182871	182881	188250	184606	191224	182871	182871	182967	182871	183164	182871	183635	182871	184218	183613	182871	184145	182871	182871	182871	182871	182871	182871	182871	182871	182871	182871	182871	182871	183253	182871	182871	183779	183969	182888	182871	182871	184170	182891	182871	182871	182871	184488	182871	182871
1684	31912.8	31910.9	31910.9	31915.1	31910.9	31912.8	32849.5	32213.8	33368.5	31910.9	31910.9	31927.7	31910.9	31962.1	31910.9	32044.2	31910.9	32146.1	32040.4	31910.9	32133.2	31910.9	31910.9	31910.9	31910.9	31910.9	31910.9	31910.9	31910.9	31910.9	31910.9	31910.9	31910.9	31977.7	31910.9	31910.9	32069.5	32102.5	31914	31910.9	31910.9	32137.6	31914.4	31910.9	31910.9	31910.9	32193	31910.9	31910.9
1691	174861	174851	174851	174874	174851	174861	179994	176511	182838	174851	174851	174943	174851	175131	174851	175582	174851	176139	175561	174851	176069	174851	174851	174851	174851	174851	174851	174851	174851	174851	174851	174851	174851	175217	174851	174851	175720	175901	174868	174851	174851	176093	174870	174851	174851	174851	176397	174851	174851
1757	22569.8	22568.5	22568.5	22571.4	22568.5	22569.8	0	22782.7	0	22568.5	22568.5	22580.4	22568.5	22604.7	22568.5	22662.8	22568.5	22734.8	0	22568.5	22725.7	22568.5	22568.5	22568.5	22568.5	22568.5	22568.5	22568.5	22568.5	22568.5	22568.5	22568.5	22568.5	22615.7	22568.5	22568.5	22680.7	22704	22570.7	22568.5	22568.5	22728.8	22571	22568.5	22568.5	22568.5	22768	22568.5	22568.5
1766	260890	260875	260875	260909	260875	260890	268548	263351	272790	260875	260875	261012	260875	261293	260875	261965	260875	262797	261933	260875	262692	260875	260875	260875	260875	260875	260875	260875	260875	260875	260875	260875	260875	261421	260875	260875	262171	262441	260900	260875	260875	262728	260903	260875	260875	260875	263181	260875	260875
1963	1981.32	1981.2	1981.2	0	1981.2	1981.32	2039.48	0	2071.69	1981.2	1981.2	1982.24	1981.2	1984.38	1981.2	1989.48	1981.2	1995.8	1989.24	1981.2	1995	1981.2	1981.2	1981.2	1981.2	1981.2	1981.2	1981.2	1981.2	1981.2	1981.2	1981.2	1981.2	1985.35	1981.2	1981.2	1991.05	1993.09	1981.39	1981.2	1981.2	1995.27	1981.42	1981.2	1981.2	1981.2	1998.72	1981.2	1981.2
1975	571825	571792	571792	571866	571792	571825	588611	577219	597909	571792	571792	572093	571792	572708	571792	574181	571792	576005	574112	571792	575775	571792	571792	571792	571792	571792	571792	571792	571792	571792	571792	571792	571792	572989	571792	571792	574633	575225	571847	571792	571792	575854	571854	571792	571792	571792	576847	571792	571792
2014	284135	284118	284118	284155	284118	284135	292475	286815	297096	284118	284118	284268	284118	284574	284118	285305	284118	286212	285271	284118	286098	284118	284118	284118	284118	284118	284118	284118	284118	284118	284118	284118	284118	284713	284118	284118	285530	285824	284146	284118	284118	286137	284149	284118	284118	284118	286630	284118	284118
2044	24381.1	24379.7	24379.7	24382.9	24379.7	24381.1	25096.8	24611.1	25493.3	24379.7	24379.7	24392.5	24379.7	0	24379.7	24481.6	24379.7	24559.4	24478.6	24379.7	24549.5	24379.7	24379.7	24379.7	24379.7	24379.7	24379.7	24379.7	24379.7	24379.7	24379.7	24379.7	24379.7	24430.7	24379.7	24379.7	24500.9	24526.1	24382	24379.7	24379.7	24552.9	24382.4	24379.7	24379.7	24379.7	24595.2	24379.7	24379.7
2171	89815	89809.7	89809.7	89821.4	89809.7	89815	92451.4	0	93911.9	89809.7	89809.7	89857	89809.7	89953.7	89809.7	90185	89809.7	90471.5	90174.2	89809.7	90435.4	89809.7	89809.7	89809.7	89809.7	89809.7	89809.7	89809.7	89809.7	89809.7	89809.7	89809.7	89809.7	89997.7	89809.7	89809.7	90256	90348.9	89818.3	89809.7	89809.7	90447.7	89819.5	89809.7	89809.7	89809.7	90603.7	89809.7	89809.7
2252	23105.4	23104	23104	23107	23104	23105.4	23783.6	23323.3	24159.3	23104	23104	23116.2	23104	23141	23104	23200.5	23104	23274.3	23197.8	23104	23265	23104	23104	23104	23104	23104	23104	23104	23104	23104	23104	23104	23104	23152.4	23104	23104	23218.8	23242.7	23106.2	23104	23104	23268.1	23106.5	23104	23104	23104	23308.3	23104	23104
2261	93243.8	93238.3	93238.3	93250.4	93238.3	93243.8	95980.9	94123.3	97497.1	93238.3	93238.3	93287.4	93238.3	93387.8	93238.3	93627.9	93238.3	93925.4	93616.7	93238.3	93887.8	93238.3	93238.3	93238.3	93238.3	93238.3	93238.3	93238.3	93238.3	93238.3	93238.3	93238.3	93238.3	93433.5	93238.3	93238.3	93701.6	93798.1	93247.3	93238.3	93238.3	93900.7	93248.5	93238.3	93238.3	93238.3	94062.7	93238.3	93238.3
2290	78447.2	78442.6	78442.6	78452.8	78442.6	78447.2	0	79187.1	82025.5	78442.6	78442.6	78483.9	78442.6	78568.4	78442.6	78770.4	78442.6	79020.6	78760.9	78442.6	78989.1	78442.6	78442.6	78442.6	78442.6	78442.6	78442.6	78442.6	78442.6	78442.6	78442.6	78442.6	78442.6	78606.8	78442.6	78442.6	78832.4	78913.6	78450.2	78442.6	78442.6	78999.9	78451.2	78442.6	78442.6	78442.6	79136.1	78442.6	78442.6
2303	110521	110515	110515	110529	110515	110521	113766	111564	115563	110515	110515	110573	110515	110692	110515	110977	110515	111329	110963	110515	111285	110515	110515	110515	110515	110515	110515	110515	110515	110515	110515	110515	110515	110746	110515	110515	111064	111178	110525	110515	110515	111300	110527	110515	110515	110515	111492	110515	110515
2385	38266	38263.8	38263.8	38268.8	38263.8	38266	39389.3	38627	40011.5	38263.8	38263.8	38284	38263.8	38325.1	38263.8	0	38263.8	38545.8	38419.1	38263.8	38530.4	38263.8	38263.8	38263.8	38263.8	38263.8	38263.8	38263.8	38263.8	38263.8	38263.8	38263.8	38263.8	38343.9	38263.8	38263.8	38454	38493.5	38267.5	38263.8	38263.8	38535.6	38268	38263.8	38263.8	38263.8	38602.1	38263.8	38263.8
2483	80958.2	80953.5	80953.5	80964	80953.5	80958.2	83334.7	81721.9	84651.1	80953.5	80953.5	80996.2	80953.5	81083.3	80953.5	81291.8	80953.5	81550	81282	80953.5	81517.5	80953.5	80953.5	80953.5	80953.5	80953.5	80953.5	80953.5	80953.5	80953.5	80953.5	80953.5	80953.5	81123	80953.5	80953.5	81355.8	81439.5	80961.3	80953.5	80953.5	81528.6	80962.3	80953.5	80953.5	80953.5	81669.2	80953.5	80953.5
2597	73943.5	73939.2	73939.2	73948.8	73939.2	73943.5	76114.1	74641	0	73939.2	73939.2	73978.2	73939.2	74057.7	73939.2	74248.1	73939.2	74484.1	74239.3	73939.2	74454.3	73939.2	73939.2	73939.2	73939.2	73939.2	73939.2	73939.2	73939.2	73939.2	73939.2	73939.2	73939.2	74094	73939.2	73939.2	74306.6	74383.1	73946.3	73939.2	73939.2	74464.5	73947.3	73939.2	73939.2	73939.2	74592.9	73939.2	73939.2
2638	150511	150502	150502	150521	150502	150511	154929	151930	157376	150502	150502	150581	150502	150743	150502	151131	150502	151611	151112	150502	151550	150502	150502	150502	150502	150502	150502	150502	150502	150502	150502	150502	150502	150817	150502	150502	151250	151405	150516	150502	150502	151571	150518	150502	150502	150502	151832	150502	150502
2667	441897	441871	441871	441929	441871	441897	454869	446065	462054	441871	441871	442104	441871	442580	441871	443717	441871	445127	443664	441871	444949	441871	441871	441871	441871	441871	441871	441871	441871	441871	441871	441871	441871	442796	441871	441871	444067	444524	441914	441871	441871	445010	441919	441871	441871	441871	445778	441871	441871
2712	104770	104764	104764	104777	104764	104770	107845	105758	109549	104764	104764	104819	104764	104932	104764	105202	104764	105536	105189	104764	105494	104764	104764	104764	104764	104764	104764	104764	104764	104764	104764	104764	104764	104983	104764	104764	105284	105393	104774	104764	104764	105508	104775	104764	104764	104764	105690	104764	104764
2773	46323.6	46320.9	46320.9	46326.9	46320.9	46323.6	47683.4	46760.5	48436.7	46320.9	46320.9	46345.3	46320.9	46395.2	46320.9	46514.4	46320.9	46662.2	46508.9	46320.9	46643.6	46320.9	46320.9	46320.9	46320.9	46320.9	46320.9	46320.9	46320.9	46320.9	46320.9	46320.9	46320.9	46417.9	46320.9	46320.9	46551.1	46599	46325.4	46320.9	46320.9	46650	46326	46320.9	46320.9	46320.9	46730.4	46320.9	46320.9
2794	11917.6	11916.9	11916.9	11918.5	11916.9	11917.6	12267.4	12030	12461.2	11916.9	11916.9	11923.2	11916.9	11936	11916.9	11966.7	11916.9	12004.7	11965.3	11916.9	11999.9	11916.9	11916.9	11916.9	11916.9	11916.9	11916.9	11916.9	11916.9	11916.9	11916.9	11916.9	11916.9	11941.8	11916.9	11916.9	11976.1	11988.4	11918	11916.9	11916.9	12001.6	11918.2	11916.9	11916.9	11916.9	0	11916.9	11916.9
2812	81560.6	81555.8	81555.8	81566.4	81555.8	81560.6	83954.7	82329.9	85280.9	81555.8	81555.8	81598.8	81555.8	81686.6	81555.8	81896.6	81555.8	82156.8	81886.8	81555.8	82124	81555.8	81555.8	81555.8	81555.8	81555.8	81555.8	81555.8	81555.8	81555.8	81555.8	81555.8	81555.8	81726.5	81555.8	81555.8	81961.1	82045.4	81563.7	81555.8	81555.8	82135.2	81564.7	81555.8	81555.8	81555.8	82276.9	81555.8	81555.8
2905	136697	136689	136689	136707	136689	136697	140710	137987	142933	136689	136689	136761	136689	136909	136689	137261	136689	137697	137244	136689	137642	136689	136689	136689	136689	136689	136689	136689	136689	136689	136689	136689	136689	136976	136689	136689	137369	137510	136703	136689	136689	137660	136704	136689	136689	136689	137898	136689	136689
2907	29715	29713.3	29713.3	29717.2	29713.3	29715	30587.3	29995.3	31070.5	29713.3	29713.3	29729	29713.3	29760.9	29713.3	29837.5	29713.3	29932.3	29833.9	29713.3	29920.3	29713.3	29713.3	29713.3	29713.3	29713.3	29713.3	29713.3	29713.3	29713.3	29713.3	29713.3	29713.3	29775.5	29713.3	29713.3	29861	29891.7	29716.2	29713.3	29713.3	29924.4	29716.5	29713.3	29713.3	29713.3	29976	29713.3	29713.3
2925	35603.7	35601.6	35601.6	35606.2	35601.6	35603.7	36648.8	35939.5	37227.7	35601.6	35601.6	35620.4	35601.6	35658.7	35601.6	35750.4	35601.6	35863.9	35746.1	35601.6	35849.6	35601.6	35601.6	35601.6	35601.6	35601.6	35601.6	35601.6	35601.6	35601.6	35601.6	35601.6	35601.6	35676.1	35601.6	35601.6	35778.5	35815.3	35605	35601.6	35601.6	35854.5	35605.5	35601.6	35601.6	35601.6	35916.4	35601.6	35601.6
2928	105379	105373	105373	105387	105373	105379	108472	106373	110186	105373	105373	105428	105373	105542	105373	105813	105373	106149	105801	105373	0	105373	105373	105373	105373	105373	105373	105373	105373	105373	105373	105373	105373	105593	105373	105373	105897	106006	105383	105373	105373	106121	105384	105373	105373	105373	106305	105373	105373
2932	78581.1	78576.5	78576.5	78586.7	78576.5	78581.1	80887.8	79322.3	82165.6	78576.5	78576.5	78617.9	78576.5	78702.5	78576.5	78904.8	78576.5	79155.5	78895.4	78576.5	79123.9	78576.5	78576.5	78576.5	78576.5	78576.5	78576.5	78576.5	78576.5	78576.5	78576.5	78576.5	78576.5	78741	78576.5	78576.5	78967	79048.3	78584.1	78576.5	78576.5	79134.7	78585.1	78576.5	78576.5	78576.5	79271.2	78576.5	78576.5
3015	41884.3	41881.9	41881.9	41887.3	41881.9	41884.3	43113.8	42279.4	43794.9	41881.9	41881.9	41904	41881.9	41949	41881.9	42056.9	41881.9	42190.5	42051.9	41881.9	42173.7	41881.9	41881.9	41881.9	41881.9	41881.9	41881.9	41881.9	41881.9	41881.9	41881.9	41881.9	41881.9	41969.6	41881.9	41881.9	42090	42133.4	41885.9	41881.9	41881.9	0	41886.5	41881.9	41881.9	41881.9	42252.2	41881.9	41881.9
3023	52269.2	52266.1	52266.1	52272.9	52266.1	52269.2	53803.5	52762.2	54653.4	52266.1	52266.1	52293.6	52266.1	52349.9	52266.1	52484.5	52266.1	52651.3	52478.2	52266.1	52630.2	52266.1	52266.1	52266.1	52266.1	52266.1	52266.1	52266.1	52266.1	52266.1	52266.1	52266.1	52266.1	52375.5	52266.1	52266.1	52525.8	52579.9	52271.1	52266.1	52266.1	52637.4	52271.8	52266.1	52266.1	52266.1	52728.2	52266.1	52266.1
3028	167107	167097	167097	167119	167097	167107	172012	168683	174730	167097	167097	167185	167097	167365	167097	167795	167097	168329	167775	167097	168261	167097	167097	167097	167097	167097	167097	167097	167097	167097	167097	167097	167097	167447	167097	167097	167928	168101	167113	167097	167097	168284	167116	167097	167097	167097	168575	167097	167097
3032	4310.85	4310.6	4310.6	4311.16	4310.6	4310.85	4437.39	4351.51	4507.49	4310.6	4310.6	4312.87	4310.6	4317.51	4310.6	4328.61	4310.6	4342.36	4328.09	4310.6	4340.63	4310.6	4310.6	4310.6	4310.6	4310.6	4310.6	4310.6	4310.6	4310.6	4310.6	4310.6	4310.6	4319.62	4310.6	4310.6	4332.02	4336.48	4311.02	4310.6	4310.6	4341.22	4311.07	4310.6	4310.6	4310.6	4348.71	4310.6	4310.6
3086	100549	100543	100543	100556	100543	100549	103500	101497	105135	100543	100543	100596	100543	100704	100543	100963	100543	101284	100951	100543	101243	100543	100543	100543	100543	100543	100543	100543	100543	100543	100543	100543	100543	100753	100543	100543	101043	101147	100553	100543	100543	101257	100554	100543	100543	100543	101432	100543	100543
3093	13811	13810.2	13810.2	13812	13810.2	13811	14216.4	13941.3	14441	13810.2	13810.2	13817.5	13810.2	13832.3	13810.2	13867.9	13810.2	13912	13866.2	13810.2	13906.4	13810.2	13810.2	13810.2	13810.2	13810.2	13810.2	13810.2	13810.2	13810.2	13810.2	13810.2	13810.2	13839.1	13810.2	13810.2	13878.8	13893.1	13811.5	13810.2	13810.2	13908.3	13811.7	13810.2	13810.2	13810.2	13932.3	13810.2	13810.2
3098	408977	408953	408953	409006	408953	408977	420982	412834	427632	408953	408953	409168	408953	409609	408953	410662	408953	411967	410613	408953	411802	408953	408953	408953	408953	408953	408953	408953	408953	408953	408953	408953	408953	409809	408953	408953	410985	411408	408992	408953	408953	411858	408998	408953	408953	408953	412569	408953	408953
3126	51413.8	51410.8	51410.8	51417.5	51410.8	51413.8	52923	0	53759	51410.8	51410.8	51437.9	51410.8	51493.2	51410.8	51625.6	51410.8	51789.6	51619.4	51410.8	51769	51410.8	51410.8	51410.8	51410.8	51410.8	51410.8	51410.8	51410.8	51410.8	51410.8	51410.8	51410.8	51518.4	51410.8	51410.8	51666.3	51719.5	51415.8	51410.8	51410.8	51776	51416.4	51410.8	51410.8	51410.8	51865.3	51410.8	51410.8
3166	33160.5	33158.6	33158.6	33162.9	33158.6	33160.5	34133.9	33473.3	34673.2	33158.6	33158.6	33176.1	33158.6	33211.8	33158.6	33297.1	33158.6	33402.9	33293.2	33158.6	33389.6	33158.6	33158.6	33158.6	33158.6	33158.6	33158.6	33158.6	33158.6	33158.6	33158.6	33158.6	33158.6	33228	33158.6	33158.6	33323.4	33357.7	33161.8	33158.6	33158.6	33394.2	33162.2	33158.6	33158.6	33158.6	33451.8	33158.6	33158.6
3167	166798	166788	166788	166810	166788	166798	171694	168371	174406	166788	166788	166876	166788	167056	166788	167485	166788	168017	167465	166788	167950	166788	166788	166788	166788	166788	166788	166788	166788	166788	166788	166788	166788	167137	166788	166788	167617	167790	166804	166788	166788	167973	166806	166788	166788	166788	168263	166788	166788
3231	22733.6	22732.3	22732.3	22735.3	22732.3	22733.6	23401	22948.1	23770.6	22732.3	22732.3	22744.3	22732.3	22768.7	22732.3	22827.3	22732.3	22899.8	22824.6	22732.3	22890.7	22732.3	22732.3	22732.3	22732.3	22732.3	22732.3	22732.3	22732.3	22732.3	22732.3	22732.3	22732.3	22779.9	22732.3	22732.3	22845.3	22868.8	22734.5	22732.3	22732.3	22893.8	22734.8	22732.3	22732.3	22732.3	22933.3	22732.3	22732.3
3254	28790.8	28789.1	28789.1	28792.8	28789.1	28790.8	29635.9	29062.3	30104.1	28789.1	28789.1	28804.3	28789.1	28835.3	28789.1	28909.4	28789.1	29001.2	28905.9	28789.1	28989.7	28789.1	28789.1	28789.1	28789.1	28789.1	28789.1	28789.1	28789.1	28789.1	28789.1	28789.1	28789.1	28849.4	28789.1	28789.1	28932.2	28961.9	28791.9	28789.1	28789.1	28993.6	28792.2	28789.1	28789.1	28789.1	29043.6	28789.1	28789.1
3287	149299	149290	149290	149309	149290	149299	153681	150707	156109	149290	149290	149369	149290	149529	149290	149914	149290	150390	149896	149290	150330	149290	149290	149290	149290	149290	149290	149290	149290	149290	149290	149290	149290	149603	149290	149290	150032	150186	149304	149290	149290	150351	149306	149290	149290	149290	150610	149290	149290
3366	59800.5	59797	59797	59804.8	59797	59800.5	61555.9	60364.5	62528.3	59797	59797	59828.5	59797	59892.9	59797	60046.9	59797	60237.6	60039.7	59797	60213.6	59797	59797	59797	59797	59797	59797	59797	59797	59797	59797	59797	59797	59922.2	59797	59797	60094.2	60156	59802.8	59797	59797	60221.8	59803.5	59797	59797	59797	60325.7	59797	59797
3484	103907	103901	103901	103915	103901	103907	106958	104888	108647	103901	103901	103956	103901	104068	103901	104336	103901	104667	104323	103901	104625	103901	103901	103901	103901	103901	103901	103901	103901	103901	103901	103901	103901	104119	103901	103901	104418	104525	103911	103901	103901	104640	103913	103901	103901	103901	104820	103901	103901
3513	20108.7	20107.5	20107.5	20110.1	20107.5	20108.7	20699	20298.3	21025.9	20107.5	20107.5	20118.1	20107.5	20139.7	20107.5	20191.5	20107.5	20255.7	20189.1	20107.5	20247.6	20107.5	20107.5	20107.5	20107.5	20107.5	20107.5	20107.5	20107.5	20107.5	20107.5	20107.5	20107.5	20149.6	20107.5	20107.5	20207.4	20228.2	20109.4	20107.5	20107.5	20250.3	20109.7	20107.5	20107.5	20107.5	20285.3	20107.5	20107.5
3552	16702.3	16701.3	16701.3	16703.5	16701.3	16702.3	17192.6	16859.8	0	16701.3	16701.3	16710.1	16701.3	16728.1	16701.3	16771.1	16701.3	16824.4	16769.1	16701.3	16817.7	16701.3	16701.3	16701.3	16701.3	16701.3	16701.3	16701.3	16701.3	16701.3	16701.3	16701.3	16701.3	16736.3	16701.3	16701.3	16784.3	16801.6	16702.9	16701.3	16701.3	16819.9	16703.1	16701.3	16701.3	16701.3	16849	16701.3	16701.3
3623	300205	300187	300187	300226	300187	300205	309017	303036	313899	300187	300187	300345	300187	300668	300187	301441	300187	302399	301405	300187	302278	300187	300187	300187	300187	300187	300187	300187	300187	300187	300187	300187	300187	300816	300187	300187	301679	301989	300216	300187	300187	302320	300220	300187	300187	300187	302841	300187	300187
3631	4286.95	4286.7	4286.7	4287.26	4286.7	4286.95	4412.79	4327.39	4482.5	4286.7	4286.7	4288.96	4286.7	4293.57	4286.7	4304.61	4286.7	4318.29	4304.1	4286.7	4316.56	4286.7	4286.7	4286.7	4286.7	4286.7	4286.7	4286.7	4286.7	4286.7	4286.7	4286.7	4286.7	4295.67	4286.7	4286.7	4308	4312.44	4287.11	4286.7	4286.7	4317.15	4287.17	4286.7	4286.7	4286.7	4324.6	4286.7	4286.7
3639	8163.38	8162.9	8162.9	8163.96	8162.9	8163.38	8403.01	8240.38	8535.75	8162.9	8162.9	8167.2	8162.9	8175.99	8162.9	8197.01	8162.9	8223.05	8196.03	8162.9	8219.77	8162.9	8162.9	8162.9	8162.9	8162.9	8162.9	8162.9	8162.9	8162.9	8162.9	8162.9	8162.9	8179.99	8162.9	8162.9	8203.47	8211.91	8163.69	8162.9	8162.9	8220.89	8163.79	8162.9	8162.9	8162.9	8235.07	8162.9	8162.9
3660	43603.9	43601.4	43601.4	43607.1	43601.4	43603.9	44883.9	44015.2	45592.9	43601.4	43601.4	43624.4	43601.4	43671.3	43601.4	43783.6	43601.4	43922.7	43778.3	43601.4	43905.2	43601.4	43601.4	43601.4	43601.4	43601.4	43601.4	43601.4	43601.4	43601.4	43601.4	43601.4	43601.4	43692.7	43601.4	43601.4	43818.1	43863.2	43605.6	43601.4	43601.4	43911.2	43606.2	43601.4	43601.4	43601.4	43986.9	43601.4	43601.4
3668	407039	407015	407015	407068	407015	407039	418987	410878	425606	407015	407015	407230	407015	407668	407015	408716	407015	410015	408667	407015	409851	407015	407015	407015	407015	407015	407015	407015	407015	407015	407015	407015	407015	407867	407015	407015	409038	409459	407054	407015	407015	409907	407060	407015	407015	407015	410614	407015	407015
3730	44412	44409.4	44409.4	44415.2	44409.4	44412	45715.7	44830.9	46437.8	44409.4	44409.4	44432.8	44409.4	44480.6	44409.4	44595	44409.4	44736.7	44589.6	44409.4	44718.8	44409.4	44409.4	44409.4	44409.4	44409.4	44409.4	44409.4	44409.4	44409.4	44409.4	44409.4	44409.4	44502.4	44409.4	44409.4	44630.1	44676	44413.7	44409.4	44409.4	44724.9	44414.3	44409.4	44409.4	44409.4	44802	44409.4	44409.4
3761	163838	163828	163828	163849	163828	163838	168647	165383	171311	163828	163828	163914	163828	164091	163828	164513	163828	165035	164493	163828	164969	163828	163828	163828	163828	163828	163828	163828	163828	163828	163828	163828	163828	164171	163828	163828	164642	164812	163844	163828	163828	164992	163846	163828	163828	163828	165276	163828	163828
3811	43000.4	42997.9	42997.9	43003.5	42997.9	43000.4	44262.7	43406	44961.9	42997.9	42997.9	43020.6	42997.9	43066.8	42997.9	43177.6	42997.9	43314.8	43172.4	42997.9	43297.4	42997.9	42997.9	42997.9	42997.9	42997.9	42997.9	42997.9	42997.9	42997.9	42997.9	42997.9	42997.9	43087.9	42997.9	42997.9	43211.6	43256.1	43002	42997.9	42997.9	43303.4	43002.6	42997.9	42997.9	42997.9	43378.1	42997.9	42997.9
3821	44108.2	44105.6	44105.6	44111.3	44105.6	44108.2	45402.9	44524.2	46120.2	44105.6	44105.6	44128.8	44105.6	44176.3	44105.6	44289.9	44105.6	44430.6	44284.6	44105.6	44412.9	44105.6	44105.6	44105.6	44105.6	44105.6	44105.6	44105.6	44105.6	44105.6	44105.6	44105.6	44105.6	44197.9	44105.6	44105.6	44324.8	44370.4	44109.8	44105.6	44105.6	44418.9	44110.4	44105.6	44105.6	44105.6	44495.6	44105.6	44105.6
3946	33928	33926	33926	33930.4	33926	33928	34923.9	34248	35475.6	33926	33926	33943.9	33926	33980.4	33926	34067.8	33926	34176	34063.7	33926	34162.3	33926	33926	33926	33926	33926	33926	33926	33926	33926	33926	33926	33926	33997	33926	33926	34094.6	34129.7	33929.3	33926	33926	34167	33929.7	33926	33926	33926	34226	33926	33926
3987	45746.3	45743.6	45743.6	45749.6	45743.6	45746.3	47089.1	46177.8	47833	45743.6	45743.6	45767.7	45743.6	45816.9	45743.6	45934.7	45743.6	46080.7	45929.2	45743.6	46062.3	45743.6	45743.6	45743.6	45743.6	45743.6	45743.6	45743.6	45743.6	45743.6	45743.6	45743.6	45743.6	45839.4	45743.6	45743.6	45970.9	46018.2	45748	45743.6	45743.6	46068.6	45748.6	45743.6	45743.6	45743.6	46148	45743.6	45743.6
4024	10322	10321.4	10321.4	10322.7	10321.4	10322	10625	10419.4	10792.8	10321.4	10321.4	10326.8	10321.4	10337.9	10321.4	10364.5	10321.4	10397.5	10363.3	10321.4	10393.3	10321.4	10321.4	10321.4	10321.4	10321.4	10321.4	10321.4	10321.4	10321.4	10321.4	10321.4	10321.4	10343	10321.4	10321.4	10372.7	10383.4	10322.4	10321.4	10321.4	10394.7	10322.5	10321.4	10321.4	10321.4	10412.7	10321.4	10321.4
4104	98187.4	98181.7	98181.7	98194.5	98181.7	98187.4	101070	99113.6	102666	98181.7	98181.7	98233.4	98181.7	98339.1	98181.7	98591.9	98181.7	98905.2	98580.1	98181.7	98865.7	98181.7	98181.7	98181.7	98181.7	98181.7	98181.7	98181.7	98181.7	98181.7	98181.7	98181.7	98181.7	98387.2	98181.7	98181.7	98669.6	98771.2	98191.2	98181.7	98181.7	98879.2	98192.4	98181.7	98181.7	98181.7	99049.8	98181.7	98181.7
4225	26107.9	26106.4	26106.4	26109.8	26106.4	26107.9	26874.3	26354.2	27298.8	26106.4	26106.4	26120.2	26106.4	26148.3	26106.4	26215.5	26106.4	26298.8	0	26106.4	26288.3	26106.4	26106.4	26106.4	26106.4	26106.4	26106.4	26106.4	26106.4	26106.4	26106.4	26106.4	26106.4	26161	26106.4	26106.4	26236.1	26263.1	26108.9	26106.4	26106.4	26291.9	26109.3	26106.4	26106.4	26106.4	26337.2	26106.4	26106.4
4271	47344.9	47342.1	47342.1	47348.3	47342.1	47344.9	48734.6	47791.4	49504.5	47342.1	47342.1	47367	47342.1	47418	47342.1	47539.9	47342.1	47691	47534.2	47342.1	47671.9	47342.1	47342.1	47342.1	47342.1	47342.1	47342.1	47342.1	47342.1	47342.1	47342.1	47342.1	47342.1	47441.2	47342.1	47342.1	47577.4	47626.3	47346.7	47342.1	47342.1	47678.4	47347.3	47342.1	47342.1	47342.1	47760.7	47342.1	47342.1
4280	75319.7	75315.3	75315.3	75325.1	75315.3	75319.7	77530.7	76030.1	78755.4	75315.3	75315.3	75355	75315.3	75436	75315.3	75630	75315.3	75870.3	75620.9	75315.3	75840	75315.3	75315.3	75315.3	75315.3	75315.3	75315.3	75315.3	75315.3	75315.3	75315.3	75315.3	75315.3	75473	75315.3	75315.3	0	75767.5	75322.6	75315.3	75315.3	75850.4	75323.5	75315.3	75315.3	75315.3	75981.2	75315.3	75315.3
4336	145855	145847	145847	145866	145847	145855	150137	147231	152508	145847	145847	145923	145847	146080	145847	146456	145847	146921	146438	145847	146863	145847	145847	145847	145847	145847	145847	145847	145847	145847	145847	145847	145847	146152	145847	145847	146571	146722	145861	145847	145847	146883	145863	145847	145847	145847	147136	145847	145847
4371	231848	231834	231834	231864	231834	231848	238653	234035	242423	231834	231834	231956	231834	232206	231834	232803	231834	233543	232775	231834	233449	231834	231834	231834	231834	231834	231834	231834	231834	231834	231834	231834	231834	232319	231834	231834	232986	233226	231857	231834	231834	233481	231860	231834	231834	231834	233884	231834	231834
4464	13749.3	13748.5	13748.5	13750.3	13748.5	13749.3	14152.9	13879	14376.5	13748.5	13748.5	13755.7	13748.5	13770.5	13748.5	13805.9	13748.5	13849.8	13804.3	13748.5	13844.3	13748.5	13748.5	13748.5	13748.5	13748.5	13748.5	13748.5	13748.5	13748.5	13748.5	13748.5	13748.5	13777.3	13748.5	13748.5	13816.8	13831	13749.8	13748.5	13748.5	13846.2	13750	13748.5	13748.5	13748.5	13870.1	13748.5	13748.5
4466	41568.1	41565.7	41565.7	41571.1	41565.7	41568.1	42788.3	41960.2	43464.3	41565.7	41565.7	41587.6	41565.7	41632.3	41565.7	41739.4	41565.7	41872	41734.4	41565.7	41855.3	41565.7	41565.7	41565.7	41565.7	41565.7	41565.7	41565.7	41565.7	41565.7	41565.7	41565.7	41565.7	41652.7	41565.7	41565.7	41772.3	41815.3	41569.7	41565.7	41565.7	41861	41570.2	41565.7	41565.7	41565.7	41933.2	41565.7	41565.7
4501	20868.3	20867.1	20867.1	20869.8	20867.1	20868.3	21480.9	21065.2	21820.2	20867.1	20867.1	20878.1	20867.1	20900.6	20867.1	20954.3	20867.1	21020.9	20951.8	20867.1	21012.5	20867.1	20867.1	20867.1	20867.1	20867.1	20867.1	20867.1	20867.1	20867.1	20867.1	20867.1	20867.1	20910.8	20867.1	20867.1	20970.8	20992.4	20869.1	20867.1	20867.1	21015.3	20869.4	20867.1	20867.1	20867.1	21051.6	20867.1	20867.1
4625	34480.1	34478.1	34478.1	34482.6	34478.1	34480.1	35492.3	34805.3	36052.9	34478.1	34478.1	34496.3	34478.1	34533.4	34478.1	34622.2	34478.1	34732.2	34618	34478.1	34718.3	34478.1	34478.1	34478.1	34478.1	34478.1	34478.1	34478.1	34478.1	34478.1	34478.1	34478.1	34478.1	34550.3	34478.1	34478.1	34649.4	34685.1	34481.4	34478.1	34478.1	34723	34481.9	34478.1	34478.1	34478.1	34782.9	34478.1	34478.1
4642	14780.3	14779.4	14779.4	14781.3	14779.4	14780.3	15214.1	14919.7	15454.5	14779.4	14779.4	14787.2	14779.4	14803.1	14779.4	14841.2	14779.4	14888.3	14839.4	14779.4	14882.4	14779.4	14779.4	14779.4	14779.4	14779.4	14779.4	14779.4	14779.4	14779.4	14779.4	14779.4	14779.4	14810.3	14779.4	14779.4	14852.8	14868.1	14780.8	14779.4	14779.4	14884.4	14781	14779.4	14779.4	14779.4	14910.1	14779.4	14779.4
4745	24754.5	24753.1	24753.1	24756.3	24753.1	24754.5	25481.2	24988	25883.7	24753.1	24753.1	24766.1	24753.1	24792.8	24753.1	24856.5	24753.1	24935.5	24853.6	24753.1	24925.5	24753.1	24753.1	24753.1	24753.1	24753.1	24753.1	24753.1	24753.1	24753.1	24753.1	24753.1	24753.1	24804.9	24753.1	24753.1	24876.1	24901.7	24755.5	24753.1	24753.1	24929	24755.8	24753.1	24753.1	24753.1	24972	24753.1	24753.1
4887	278489	278473	278473	278509	278473	278489	286664	281116	291193	278473	278473	278620	278473	278919	278473	279637	278473	280525	279603	278473	280413	278473	278473	278473	278473	278473	278473	278473	278473	278473	278473	278473	278473	279056	278473	278473	279857	280145	278500	278473	278473	280451	278503	278473	278473	278473	280935	278473	278473
4911	73489	73484.7	73484.7	73494.3	73484.7	73489	75646.2	74182.2	76841.2	73484.7	73484.7	73523.4	73484.7	73602.5	73484.7	73791.7	73484.7	74026.2	73782.9	73484.7	73996.6	73484.7	73484.7	73484.7	73484.7	73484.7	73484.7	73484.7	73484.7	73484.7	73484.7	73484.7	73484.7	73638.5	73484.7	73484.7	73849.9	73925.9	73491.8	73484.7	73484.7	74006.8	73492.7	73484.7	73484.7	73484.7	74134.4	73484.7	73484.7
4919	14438.4	14437.6	14437.6	14439.5	14437.6	14438.4	14862.3	14574.6	15097.1	14437.6	14437.6	14445.2	14437.6	14460.7	14437.6	14497.9	14437.6	14544	14496.2	14437.6	14538.2	14437.6	14437.6	14437.6	14437.6	14437.6	14437.6	14437.6	14437.6	14437.6	14437.6	14437.6	14437.6	14467.8	14437.6	14437.6	14509.3	14524.3	14439	14437.6	14437.6	14540.2	14439.2	14437.6	14437.6	14437.6	14565.2	14437.6	14437.6
4928	487196	487168	487168	487231	487168	487196	501498	491792	509420	487168	487168	487425	487168	487949	487168	489204	487168	490758	489145	487168	490562	487168	487168	487168	487168	487168	487168	487168	487168	487168	487168	487168	487168	488188	487168	487168	489589	490093	487215	487168	487168	490629	487221	487168	487168	487168	491475	487168	487168
4931	339159	339139	339139	339183	339139	339159	349115	342358	354630	339139	339139	339318	339139	339683	339139	340556	339139	341638	340515	339139	341502	339139	339139	339139	339139	339139	339139	339139	339139	339139	339139	339139	339139	339849	339139	339139	340825	341175	339172	339139	339139	341549	339176	339139	339139	339139	342138	339139	339139
5029	75550.3	75545.9	75545.9	75555.7	75545.9	75550.3	0	76262.9	78996.5	75545.9	75545.9	75585.7	75545.9	75667	75545.9	75861.6	75545.9	76102.6	75852.5	75545.9	76072.2	75545.9	75545.9	75545.9	75545.9	75545.9	75545.9	75545.9	75545.9	75545.9	75545.9	75545.9	75545.9	75704	75545.9	75545.9	75921.3	0	75553.2	75545.9	75545.9	76082.6	75554.2	75545.9	75545.9	75545.9	76213.8	75545.9	75545.9
5078	35857.7	35855.6	35855.6	35860.3	35855.6	35857.7	36910.3	36195.9	37493.3	35855.6	35855.6	35874.5	35855.6	35913.1	35855.6	36005.4	35855.6	36119.8	36001.1	35855.6	36105.4	35855.6	35855.6	35855.6	35855.6	35855.6	35855.6	35855.6	35855.6	35855.6	35855.6	35855.6	35855.6	35930.7	35855.6	35855.6	36033.8	36070.9	35859.1	35855.6	35855.6	36110.3	35859.5	35855.6	35855.6	35855.6	36172.6	35855.6	35855.6
5100	52782.4	52779.3	52779.3	52786.2	52779.3	52782.4	54331.8	53280.2	55190	52779.3	52779.3	52807.1	52779.3	52863.9	52779.3	52999.8	52779.3	53168.2	52993.5	52779.3	53147	52779.3	52779.3	52779.3	52779.3	52779.3	52779.3	52779.3	52779.3	52779.3	52779.3	52779.3	52779.3	52889.8	52779.3	52779.3	53041.6	53096.2	52784.4	52779.3	52779.3	53154.3	52785.1	52779.3	52779.3	52779.3	53245.9	52779.3	52779.3
5142	16928.7	16927.7	16927.7	16929.9	16927.7	16928.7	17425.6	17088.4	17700.9	16927.7	16927.7	16936.6	16927.7	16954.8	16927.7	16998.4	16927.7	17052.4	16996.4	16927.7	17045.6	16927.7	16927.7	16927.7	16927.7	16927.7	16927.7	16927.7	16927.7	16927.7	16927.7	16927.7	16927.7	16963.1	16927.7	16927.7	17011.8	17029.3	16929.3	16927.7	16927.7	17048	16929.5	16927.7	16927.7	16927.7	17077.4	16927.7	16927.7
5158	17092.2	17091.2	17091.2	17093.4	17091.2	17092.2	17593.9	17253.4	17871.9	17091.2	17091.2	17100.2	17091.2	17118.6	17091.2	0	17091.2	17217.1	17160.6	17091.2	17210.3	17091.2	17091.2	17091.2	17091.2	17091.2	17091.2	17091.2	17091.2	17091.2	17091.2	17091.2	17091.2	17127	17091.2	17091.2	17176.1	17193.8	17092.8	17091.2	17091.2	17212.6	17093.1	17091.2	17091.2	17091.2	17242.3	17091.2	17091.2
5349	35664.7	35662.6	35662.6	35667.2	35662.6	35664.7	36711.6	36001.1	37291.5	35662.6	35662.6	35681.4	35662.6	35719.8	35662.6	35811.6	35662.6	35925.4	35807.3	35662.6	35911	35662.6	35662.6	35662.6	35662.6	35662.6	35662.6	35662.6	35662.6	35662.6	35662.6	35662.6	35662.6	35737.3	35662.6	35662.6	35839.8	35876.7	35666	35662.6	35662.6	35916	35666.5	35662.6	35662.6	35662.6	35977.9	35662.6	35662.6
5371	53096.4	53093.3	53093.3	53100.2	53093.3	53096.4	54655	53597.2	55518.4	53093.3	53093.3	53121.3	53093.3	53178.4	53093.3	53315.1	53093.3	53484.5	53308.8	53093.3	53463.2	53093.3	53093.3	53093.3	53093.3	53093.3	53093.3	53093.3	53093.3	53093.3	53093.3	53093.3	53093.3	53204.4	53093.3	53093.3	53357.1	53412.1	53098.4	53093.3	53093.3	53470.5	53099.1	53093.3	53093.3	53093.3	53562.7	53093.3	53093.3
5397	44238.6	44236	44236	44241.8	44236	44238.6	45537.2	44655.9	46256.5	44236	44236	44259.3	44236	44306.9	44236	44420.8	44236	44562	44415.5	44236	44544.2	44236	44236	44236	44236	44236	44236	44236	44236	44236	44236	44236	44236	44328.6	44236	44236	44455.8	44501.6	44240.3	44236	44236	44550.3	44240.8	44236	44236	44236	44627.1	44236	44236
5426	243623	243609	243609	243640	243609	243623	250774	245921	254736	243609	243609	243737	243609	243999	243609	244627	243609	245404	244597	243609	245306	243609	243609	243609	243609	243609	243609	243609	243609	243609	243609	243609	243609	244119	243609	243609	244819	245071	243632	243609	243609	245339	243635	243609	243609	243609	245763	243609	243609
5440	42718.4	42715.9	42715.9	42721.5	42715.9	42718.4	0	43121.3	44667	42715.9	42715.9	42738.4	42715.9	42784.4	42715.9	42894.4	42715.9	43030.7	42889.2	42715.9	43013.5	42715.9	42715.9	42715.9	42715.9	42715.9	42715.9	42715.9	42715.9	42715.9	42715.9	42715.9	42715.9	42805.3	42715.9	42715.9	42928.2	42972.4	42720	42715.9	42715.9	43019.4	42720.6	42715.9	42715.9	42715.9	43093.6	42715.9	42715.9
5490	16085.7	16084.8	16084.8	16086.9	16084.8	16085.7	16557.9	16237.5	16819.5	16084.8	16084.8	16093.3	16084.8	16110.6	16084.8	16152	16084.8	16203.3	16150.1	16084.8	16196.9	16084.8	16084.8	16084.8	16084.8	16084.8	16084.8	16084.8	16084.8	16084.8	16084.8	16084.8	16084.8	16118.5	16084.8	16084.8	16164.7	16181.4	16086.3	16084.8	16084.8	16199.1	16086.6	16084.8	16084.8	16084.8	16227	16084.8	16084.8
5516	10294.9	10294.3	10294.3	10295.6	10294.3	10294.9	10597.1	10392	10764.5	10294.3	10294.3	10299.7	10294.3	10310.8	10294.3	10337.3	10294.3	10370.2	10336.1	10294.3	10366	10294.3	10294.3	10294.3	10294.3	10294.3	10294.3	10294.3	10294.3	10294.3	10294.3	10294.3	10294.3	10315.8	10294.3	10294.3	10345.5	10356.1	10295.3	10294.3	10294.3	10367.4	10295.4	10294.3	10294.3	10294.3	10385.3	10294.3	10294.3
5546	8021.27	8020.8	8020.8	8021.84	8020.8	8021.27	8256.73	8096.93	8387.16	8020.8	8020.8	0	8020.8	8033.66	8020.8	0	8020.8	8079.91	8053.35	8020.8	8076.68	8020.8	8020.8	8020.8	8020.8	8020.8	8020.8	8020.8	8020.8	8020.8	8020.8	8020.8	8020.8	8037.59	8020.8	8020.8	8060.66	8068.96	8021.57	8020.8	8020.8	8077.78	8021.68	8020.8	8020.8	8020.8	8091.71	8020.8	8020.8
5629	29393.3	29391.6	29391.6	29395.4	29391.6	29393.3	30256.1	29670.6	30734.1	29391.6	29391.6	29407.1	29391.6	29438.7	29391.6	29514.4	29391.6	29608.2	29510.9	29391.6	29596.4	29391.6	29391.6	29391.6	29391.6	29391.6	29391.6	29391.6	29391.6	29391.6	29391.6	29391.6	29391.6	29453.1	29391.6	29391.6	29537.7	29568.1	29394.4	29391.6	29391.6	29600.4	29394.8	29391.6	29391.6	29391.6	29651.5	29391.6	29391.6
5640	44919	44916.4	44916.4	44922.2	44916.4	44919	46237.6	45342.7	46968	44916.4	44916.4	44940.1	44916.4	44988.4	44916.4	45104.1	44916.4	45247.4	45098.7	44916.4	45229.3	44916.4	44916.4	44916.4	44916.4	44916.4	44916.4	44916.4	44916.4	44916.4	44916.4	44916.4	44916.4	45010.4	44916.4	44916.4	45139.6	45186.1	44920.7	44916.4	44916.4	45235.5	44921.3	44916.4	44916.4	44916.4	45313.5	44916.4	44916.4
5705	148997	148988	148988	149008	148988	148997	153371	150402	155793	148988	148988	149067	148988	149227	148988	149611	148988	150086	149593	148988	150026	148988	148988	148988	148988	148988	148988	148988	148988	148988	148988	148988	148988	149300	148988	148988	149729	149883	149003	148988	148988	150047	149005	148988	148988	148988	150306	148988	148988
5792	1663.4	1663.3	1663.3	1663.52	1663.3	1663.4	1712.23	1679.09	1739.27	1663.3	1663.3	1664.18	1663.3	1665.97	1663.3	1670.25	1663.3	1675.56	1670.05	1663.3	1674.89	1663.3	1663.3	1663.3	1663.3	1663.3	1663.3	1663.3	1663.3	1663.3	1663.3	1663.3	1663.3	1666.78	1663.3	1663.3	1671.57	0	1663.46	1663.3	1663.3	1675.12	0	1663.3	1663.3	1663.3	1678.01	1663.3	1663.3
5839	41044.7	41042.3	41042.3	41047.6	41042.3	41044.7	42249.5	41431.8	42917	41042.3	41042.3	41063.9	41042.3	41108.1	41042.3	41213.8	41042.3	41344.7	41208.9	41042.3	41328.2	41042.3	41042.3	41042.3	41042.3	41042.3	41042.3	41042.3	41042.3	41042.3	41042.3	41042.3	41042.3	41128.2	41042.3	41042.3	41246.3	41288.7	41046.3	41042.3	41042.3	41333.9	41046.8	41042.3	41042.3	41042.3	41405.2	41042.3	41042.3
5856	58264.8	58261.4	58261.4	58269	58261.4	58264.8	59975.1	58814.4	60922.6	58261.4	58261.4	58292.1	58261.4	58354.8	58261.4	58504.8	58261.4	58690.7	58497.8	58261.4	58667.3	58261.4	58261.4	58261.4	58261.4	58261.4	58261.4	58261.4	58261.4	58261.4	58261.4	58261.4	58261.4	58383.4	58261.4	58261.4	58550.9	58611.2	58267	58261.4	58261.4	58675.3	58267.8	58261.4	58261.4	58261.4	58776.5	58261.4	58261.4
5871	20491.7	20490.5	20490.5	20493.2	20490.5	20491.7	21093.2	20685	21426.4	20490.5	20490.5	20501.3	20490.5	20523.4	20490.5	20576.1	20490.5	20641.5	20573.7	20490.5	20633.2	20490.5	20490.5	20490.5	20490.5	20490.5	20490.5	20490.5	20490.5	20490.5	20490.5	20490.5	20490.5	20533.4	20490.5	20490.5	20592.3	20613.5	20492.5	20490.5	20490.5	20636.1	20492.7	20490.5	20490.5	20490.5	20671.7	20490.5	20490.5
5906	455385	455359	455359	455418	455359	455385	468753	459680	476157	455359	455359	455598	455359	456089	455359	457261	455359	458714	457206	455359	458531	455359	455359	455359	455359	455359	455359	455359	455359	455359	455359	455359	455359	456312	455359	455359	457621	458092	455402	455359	455359	458593	455408	455359	455359	455359	459384	455359	455359
5930	85627.9	85622.9	85622.9	85634	85622.9	85627.9	88141.5	86435.6	89533.8	85622.9	85622.9	85668	85622.9	85760.2	85622.9	85980.7	85622.9	86253.9	85970.4	85622.9	86219.4	85622.9	85622.9	85622.9	85622.9	85622.9	85622.9	85622.9	85622.9	85622.9	85622.9	85622.9	85622.9	85802.1	85622.9	85622.9	86048.4	86137	85631.1	85622.9	85622.9	86231.2	85632.3	85622.9	85622.9	85622.9	86379.9	85622.9	85622.9
6091	1466.49	1466.4	1466.4	1466.59	1466.4	1466.49	1509.53	1480.32	1533.38	1466.4	1466.4	1467.17	1466.4	1468.75	1466.4	1472.53	1466.4	1477.21	1472.35	1466.4	1476.62	1466.4	1466.4	1466.4	1466.4	1466.4	1466.4	1466.4	1466.4	1466.4	1466.4	1466.4	1466.4	1469.47	1466.4	1466.4	1473.69	1475.2	0	1466.4	1466.4	1476.82	1466.56	1466.4	1466.4	1466.4	1479.36	1466.4	1466.4
6097	0	890.3	890.3	890.416	890.3	0	916.488	898.75	930.965	890.3	890.3	890.769	890.3	891.727	890.3	894.02	890.3	896.861	893.913	890.3	896.502	890.3	890.3	890.3	890.3	890.3	890.3	890.3	890.3	890.3	890.3	890.3	890.3	892.164	890.3	890.3	894.724	895.645	890.386	890.3	890.3	896.625	890.397	890.3	890.3	890.3	898.171	890.3	890.3
6102	81679.7	81674.9	81674.9	81685.5	81674.9	81679.7	84077.3	82450.1	85405.5	81674.9	81674.9	81717.9	81674.9	81805.8	81674.9	82016.2	81674.9	82276.8	82006.4	81674.9	82243.9	81674.9	81674.9	81674.9	81674.9	81674.9	81674.9	81674.9	81674.9	81674.9	81674.9	81674.9	81674.9	81845.9	81674.9	81674.9	82080.8	82165.3	81682.8	81674.9	81674.9	82255.1	81683.8	81674.9	81674.9	81674.9	0	81674.9	81674.9
6211	111423	111416	111416	111431	111416	111423	114693	112474	116505	111416	111416	111475	111416	111595	111416	111882	111416	0	111868	111416	112192	111416	111416	111416	111416	111416	111416	111416	111416	111416	111416	111416	111416	111649	111416	111416	111970	112085	111427	111416	111416	112208	111428	111416	111416	111416	112401	111416	111416
[truncated: 8 more columns]

## Sheet: Tab. 8 CRP example Kyrill
Table 8 - CRP example: The computation of a (capital weighted) CRP is demonstrated for stom event Kyrill, 2007. The result is shown on the tight.										CRP [year]	17.6482
Station		Capital weight	Parameter of the Gumbel distribution			Kyrill, 2007
ID	Name		m	s	s corrected	Wind speed [m/s]	Event intensity [m^1.5/s^1.5]	RP [half season], biased	RP [half season], bias corrected	RP [year ]	Weighting calculation
164	Angermünde	0.00220228	111.064	20.9701	21.3981	29.8	162.676	11.1564	10.0253	5.01266	0.0110393
183	Arkona	9.53256e-05	160.974	28.8261	29.4144	28.5	152.148	0.740786	0.734893	0.367447	3.50271e-05
198	Artern	0.00178232	116.71	24.8935	25.4016	39.7	250.142	191.119	137.735	68.8677	0.122744
232	Augsburg	0.0114701	108.532	24.6543	25.1574	30.7	170.101	11.5576	10.365	5.18252	0.0594437
282	Bamberg	0.00752585	82.3772	19.4355	19.8321	25.6	129.527	10.7773	9.70355	4.85178	0.0365137
298	Barth	0.000845962	118.64	20.4351	20.8522	28.3	150.55	4.61945	4.33842	2.16921	0.00183507
303	Baruth	0.000898782	109.894	22.8037	23.2691	34.7	204.406	58.0729	46.5835	23.2917	0.0209342
427	Berlin-Schönefeld	0.00476033	107.419	21.9934	22.4422	31	172.601	18.2543	15.9242	7.9621	0.0379022
430	Berlin-Tegel	0.0141998	104.407	20.1134	20.5239	33.1	190.433	66.1211	52.4776	26.2388	0.372586
433	Berlin-Tempelhof	0.0176069	100.811	20.8928	21.3191	33.5	193.895	78.7477	61.5848	30.7924	0.542158
591	Boizenburg	0.00344473	104.235	23.2049	23.6785	30.2	165.963	13.5571	12.0456	6.02279	0.0207469
596	Boltenhagen	0.000825562	136.306	33.5239	34.2081	37.1	225.975	13.7534	12.2096	6.10478	0.00503987
619	Borkum-Süderstraße	1.5718e-05	141.443	29.2847	29.8823	30.6	169.271	2.53764	2.43968	1.21984	1.91735e-05
656	Braunlage	0.000796831	99.2936	15.6879	16.008	34.1	199.128	511.061	331.829	165.914	0.132206
662	Braunschweig	0.0124991	102.56	20.6587	21.0803	30.9	171.766	26.6556	22.6731	11.3366	0.141697
691	Bremen	0.0110233	115.439	20.7207	21.1435	27.3	142.641	3.62018	3.43468	1.71734	0.0189308
701	Bremerhaven	0.00310453	133.445	24.7566	25.2618	30.6	169.271	4.12968	3.89704	1.94852	0.00604923
722	Brocken	0.0013966	275.457	46.1849	47.1275	55.4	412.349	18.2601	15.9289	7.96445	0.0111231
766	Büchel (Flugplatz)	0.00430428	103.136	22.7669	23.2315	26.2	134.107	3.79296	3.59186	1.79593	0.00773018
840	Carlsfeld	0.00177525	94.2569	16.86	17.2041	35.8	214.203	1066.27	634.4	317.2	0.563111
853	Chemnitz	0.00727272	128.483	25.105	25.6174	37.4	228.722	50.044	40.6236	20.3118	0.147722
867	Lautertal-Oberlauter	0.00397369	93.115	19.0826	19.472	31.3	175.112	67.4256	53.4261	26.713	0.106149
880	Cottbus	0.00346802	91.8395	17.3635	17.7179	35.2	208.84	737.697	459.004	229.502	0.795916
891	Cuxhaven	0.00171577	126.052	25.9111	26.4399	27.5	144.211	1.98738	1.92605	0.963026	0.00165233
953	Deuselbach	0.000636342	120.907	19.2546	19.6476	32.6	186.134	27.6563	23.4639	11.7319	0.00746553
963	Diepholz	0.00371721	114.867	20.0533	20.4626	30.8	170.933	15.4858	13.6491	6.82453	0.0253682
1001	Doberlug-Kirchhain	0.00177771	105.545	19.9082	20.3145	31.9	180.171	39.3911	32.5715	16.2858	0.0289513
1048	Dresden-Klotzsche	0.00995609	111.954	22.9426	23.4108	34.3	200.882	44.6376	36.5595	18.2798	0.181995
1078	Düsseldorf	0.036248	110.848	23.641	24.1235	40.3	255.834	407.55	271.393	135.696	4.91873
1262	München-Flughafen	0.0531608	118.011	28.097	28.6704	33	189.571	12.1333	10.851	5.42548	0.288423
1270	Erfurt-Weimar	0.00484672	121.298	20.1364	20.5474	33	189.571	27.7348	23.5258	11.7629	0.0570114
1303	Essen-Bredeney	0.0537551	97.46	17.5463	17.9044	29	156.17	26.5512	22.5905	11.2952	0.607176
1339	Faßberg	0.00207317	103.089	23.3113	23.7871	30.9	171.766	17.9426	15.6694	7.83471	0.0162427
1420	Frankfurt/Main	0.0456539	98.3119	20.4786	20.8965	26.3	134.876	5.75318	5.34991	2.67496	0.122122
1443	Freiburg	0.0118483	104.011	21.5953	22.0361	23.9	116.841	1.79004	1.74029	0.870145	0.0103097
1468	Freudenstadt	0.00943358	129.377	29.4268	30.0273	31.6	177.636	4.98856	4.66923	2.33461	0.0220238
1544	Gardelegen	0.000689294	99.7614	17.5661	17.9246	22.7	108.153	1.59706	1.55774	0.778872	0.000536871
1550	Garmisch-Partenkirchen	0.000610953	58.2928	11.9723	12.2166	21.1	96.9223	23.6188	20.2574	10.1287	0.00618817
1580	Geisenheim	0.0094778	96.568	20.2264	20.6392	26.4	135.646	6.64172	6.13389	3.06694	0.0290679
1605	Genthin	0.00190361	92.2388	18.4958	18.8733	25.7	130.287	7.50793	6.89166	3.44583	0.00655952
1612	Gera-Leumnitz	0.00315411	112.265	23.4712	23.9502	32.1	181.869	18.287	15.9509	7.97545	0.0251554
1639	GieÃŸen/Wettenberg	0.0120065	100.565	21.8701	22.3164	33.8	196.506	73.6336	57.9153	28.9577	0.347681
1684	Görlitz	0.00209513	111.685	18.743	19.1256	34.3	200.882	106.034	80.786	40.393	0.0846288
1691	Göttingen	0.01148	106.994	21.5149	21.954	29.1	156.978	9.74501	8.82312	4.41156	0.0506446
1757	Greifswald	0.00148175	110.909	20.4442	20.8615	29	156.17	8.75452	7.97217	3.98608	0.00590639
1766	Münster/Osnabrück	0.0171279	106.144	22.1551	22.6073	30.9	171.766	18.2234	15.8989	7.94945	0.136158
1963	Hallig Hooge	0.000130077	151.072	34.0381	34.7328	33.3	192.161	3.26423	3.10953	1.55476	0.000202239
1975	Hamburg-Fuhlsbüttel	0.0375414	109.281	20.8108	21.2355	25.1	125.751	2.17188	2.09895	1.04947	0.0393988
2014	Hannover	0.018654	108.269	22.9161	23.3838	31.1	173.437	16.2298	14.2633	7.13167	0.133034
2044	Harzgerode	0.00160067	110.087	20.6554	21.0769	27.6	144.999	5.24023	4.89393	2.44697	0.00391678
2171	Hersfeld, Bad	0.00589653	96.7191	18.2379	18.6101	30.7	170.101	51.5797	41.7702	20.8851	0.12315
2252	Bertsdorf-Hörnitz	0.00151691	92.5016	17.4134	17.7688	30.7	170.101	78.8215	61.6376	30.8188	0.0467494
2261	Hof	0.00612163	95.8945	20.0332	20.442	32	181.019	64.3415	51.1807	25.5903	0.156655
2290	Hohenpeißenberg	0.00515021	172.518	46.3435	47.2893	45.1	302.876	15.7463	13.8644	6.93222	0.0357024
2303	Hohn	0.00725593	118.504	25.2714	25.7872	29.8	162.676	5.54533	5.16547	2.58273	0.0187401
2385	Idar-Oberstein	0.00251224	118.643	27.0269	27.5785	31.9	180.171	9.30959	8.44983	4.22491	0.010614
2483	Kahler Asten	0.00531506	150.12	25.3387	25.8558	37.9	233.324	24.9779	21.3416	10.6708	0.056716
2597	Kissingen, Bad	0.00485454	95.3973	22.3167	22.7722	31.6	177.636	37.0164	30.7507	15.3753	0.0746402
2638	Klippeneck	0.00988131	138.65	29.422	30.0224	35.5	211.516	11.3253	10.1685	5.08423	0.0502389
2667	Köln-Bonn	0.0290114	99.2201	22.1778	22.6304	35.5	211.516	142.902	105.92	52.9599	1.53644
2712	Konstanz	0.00687835	103.789	24.7592	25.2645	26.3	134.876	3.42282	3.25463	1.62731	0.0111932
2773	Kümmersbruck	0.00304123	93.6917	23.4175	23.8954	30.9	171.766	26.2417	22.3453	11.1727	0.0339787
2794	Kyritz	0.000782413	109.23	18.7792	19.1624	29	156.17	11.5832	10.3867	5.19333	0.00406333
2812	Lahr	0.00535461	93.705	20.5571	20.9767	22.6	107.439	1.92463	1.86708	0.93354	0.00499874
2905	Lechfeld	0.00897445	106.232	25.1446	25.6578	28.8	154.557	6.57625	6.07636	3.03818	0.027266
2907	Leck	0.00195085	119.958	28.5477	29.1303	28.6	152.95	3.10358	2.96217	1.48108	0.00288937
2925	Leinefelde	0.00233745	106.972	21.7347	22.1783	32.5	185.279	34.1498	28.5386	14.2693	0.0333538
2928	Leipzig-Holzhausen	0.00691834	84.5219	18.115	18.4847	24.7	122.757	7.91258	7.24364	3.62182	0.025057
2932	Leipzig/Halle	0.005159	115.832	21.1637	21.5956	31	172.601	13.8556	12.2949	6.14744	0.0317146
3015	Lindenberg	0.00274979	107.948	23.214	23.6877	33	189.571	31.3678	26.3759	13.1879	0.036264
3023	Lingen	0.00343157	94.3382	18.3036	18.6771	32.6	186.134	136.306	101.481	50.7405	0.17412
3028	Lippspringe, Bad	0.0109709	104.385	17.6162	17.9757	29.7	161.858	24.4656	20.9335	10.4668	0.11483
3032	List auf Sylt	0.000283016	164.574	41.5785	42.427	35.5	211.516	3.02347	2.88853	1.44427	0.00040875
3086	Lübeck-Blankensee	0.00660123	100.724	21.3776	21.8139	30.6	169.271	23.1576	19.8884	9.94418	0.0656438
3093	Lüchow	0.000906719	92.361	18.4138	18.7896	27.9	147.369	18.6823	16.2733	8.13667	0.00737767
3098	Lüdenscheid	0.0268501	108.867	21.8228	22.2682	34.8	205.291	75.9506	59.5809	29.7904	0.799877
3126	Magdeburg	0.00337542	91.1543	21.0959	21.5264	28.9	155.363	19.7426	17.1356	8.56782	0.0289199
3166	Marienberg	0.00217705	100.034	15.7879	16.1101	30	164.317	54.0676	43.621	21.8105	0.0474826
3167	Marienberg, Bad	0.0109506	101.414	18.4556	18.8322	32.5	185.279	85.9054	66.6803	33.3402	0.365095
3231	Meiningen	0.00149251	97.4555	25.0205	25.5311	29.7	161.858	12.4599	11.1259	5.56293	0.00830271
3254	Meppen	0.00189017	95.4978	24.4081	24.9063	30.9	171.766	21.3749	18.4559	9.22796	0.0174424
3287	Michelstadt-Vielbrunn	0.00980175	111.005	19.1406	19.5313	31.6	177.636	30.3111	25.55	12.775	0.125217
3366	Mühldorf	0.00392602	114.168	30.254	30.8715	38.3	237.027	53.5013	43.2004	21.6002	0.0848027
3484	Neuburg/Donau	0.00682173	98.8396	23.9355	24.4239	26.8	138.74	5.12262	4.789	2.3945	0.0163346
3513	Neuhaus am Rennweg	0.00132017	120.423	20.1979	20.6101	31.8	179.325	17.4252	15.2458	7.62292	0.0100636
3552	Neuruppin	0.00109654	100.923	23.8393	24.3258	29	156.17	9.69038	8.77636	4.38818	0.0048118
3623	Nörvenich (Flugplatz)	0.019709	104.708	23.2026	23.6761	34	198.252	51.987	42.0738	21.0369	0.414617
3631	Norderney	0.000281447	142.657	28.6415	29.226	31.3	175.112	3.03582	2.89989	1.44994	0.000408082
3639	Nordholz (Flugplatz)	0.000535942	122.92	31.1287	31.764	31.4	175.952	5.3098	4.95593	2.47797	0.00132805
3660	Nürburg-Barweiler	0.00286268	103.164	19.067	19.4561	34.2	200.004	145.093	107.39	53.6948	0.153711
3668	Nürnberg	0.0267229	103.307	22.3546	22.8108	27.9	147.369	6.90083	6.3612	3.1806	0.0849949
3730	Oberstdorf	0.00291573	77.6211	18.1033	18.4727	19.8	88.1044	1.76385	1.71557	0.857786	0.00250108
3761	Öhringen	0.0107563	108.899	23.6586	24.1414	30.5	168.442	11.7802	10.5532	5.27658	0.0567562
3811	Oschatz	0.00282306	114.632	22.3948	22.8519	30.4	167.614	10.1603	9.17811	4.58905	0.0129552
3821	Osterfeld	0.00289579	105.071	21.2355	21.6689	31.7	178.48	29.5992	24.9922	12.4961	0.036186
3946	Plauen	0.00222744	95.3875	19.1834	19.5749	31.4	175.952	61.2957	48.9527	24.4764	0.0545196
3987	Potsdam	0.00300333	121.215	22.0779	22.5285	32.1	181.869	14.7654	13.0521	6.52603	0.0195998
4024	Putbus	0.00067766	120.869	23.8037	24.2895	27.2	141.858	2.37288	2.28652	1.14326	0.000774741
4104	Regensburg	0.0064462	96.4093	20.9105	21.3373	31.9	180.171	50.6846	41.1023	20.5511	0.132477
4225	Roding-Wetterfeld	0.00171404	86.004	23.6122	24.0941	28.5	152.148	15.5685	13.7174	6.85872	0.0117561
4271	Rostock-WarnemÃ¼nde	0.00310828	129.483	30.9939	31.6265	33.6	194.764	7.87834	7.2139	3.60695	0.0112114
4280	Roth	0.00494488	98.4202	23.1586	23.6313	32.9	188.71	45.6388	37.3155	18.6577	0.0922603
4336	Saarbrücken-Ensheim	0.00957567	110.222	24.5159	25.0162	29.6	161.041	7.6252	6.9938	3.4969	0.0334852
4371	Salzuflen, Bad	0.0152213	98.2643	19.562	19.9612	28.8	154.557	16.7787	14.7152	7.35759	0.111992
4464	Schleiz	0.000902668	119.175	24.7879	25.2938	39.2	245.431	147.168	108.778	54.3892	0.0490954
4466	Schleswig	0.00272903	116.276	26.5199	27.0611	30.1	165.139	6.08397	5.64262	2.82131	0.00769943
4501	Schmücke	0.00137005	144.307	19.4181	19.8144	40.9	261.568	371.649	249.993	124.997	0.171251
4625	Schwerin	0.00226369	117.458	25.6449	26.1683	31.7	178.48	10.2974	9.29501	4.6475	0.0105205
4642	Seehausen	0.000970353	107.923	18.297	18.6704	26.8	138.74	5.21014	4.8671	2.43355	0.0023614
4745	Soltau	0.00162518	102.029	16.8404	17.1841	26.2	134.107	6.46732	5.98057	2.99029	0.00485977
4887	Stötten	0.0182834	158.626	32.0006	32.6536	37	225.062	7.64888	7.01441	3.5072	0.0641235
4911	Straubing	0.00482469	92.2781	23.1691	23.6419	28.8	154.557	13.933	12.3594	6.17969	0.0298151
4919	Strucklahnungshörn	0.000947912	159.13	36.826	37.5775	40.6	258.696	14.1483	12.5388	6.26941	0.00594285
4928	Stuttgart (Schnarrenberg)	0.0319854	105.196	28.0432	28.6156	29.9	163.496	7.67027	7.03302	3.51651	0.112477
4931	Stuttgart-Echterdingen	0.0222664	103.042	26.9804	27.531	25.7	130.287	2.69012	2.581	1.2905	0.0287348
5029	Tholey	0.00496002	112.248	23.8557	24.3426	29.5	160.226	7.17738	6.60321	3.3016	0.016376
5078	Travemünde	0.00235413	126.388	29.6558	30.261	30.7	170.101	4.23985	3.99657	1.99829	0.00470422
5100	Trier-Petrisberg	0.00346527	118.582	20.6157	21.0364	28.4	151.348	4.74746	4.45331	2.22666	0.00771596
5142	Ueckermünde	0.0011114	102.822	24.3482	24.8451	32.6	186.134	28.5957	24.204	12.102	0.0134502
5158	Ummendorf	0.00112214	126.743	22.6199	23.0816	33.1	190.433	15.7894	13.9	6.95	0.00779884
5349	Waren (Müritz)	0.00234146	98.0345	17.5512	17.9094	29.9	163.496	38.6729	32.0219	16.011	0.037489
5371	Wasserkuppe	0.00348588	167.443	25.0418	25.5528	47.8	330.477	590.104	376.897	188.449	0.65691
5397	Weiden	0.00290435	86.7561	17.8319	18.1958	27	140.296	18.9621	16.5012	8.25062	0.0239627
5426	Weinbiet	0.0159943	203.539	37.2443	38.0043	45.4	305.903	14.7829	13.0666	6.5333	0.104496
5440	Weißenburg-Emetzheim	0.00280455	96.597	21.2665	21.7005	25.8	131.048	4.89179	4.58264	2.29132	0.00642612
5490	Wernigerode	0.00105606	128.91	23.2123	23.686	38.1	235.173	88.7919	68.7226	34.3613	0.0362876
5516	Fehmarn	0.00067588	144.273	30.6538	31.2794	33.9	197.378	5.46184	5.09125	2.54563	0.00172054
5546	Wiesenburg	0.000526612	106.665	19.1371	19.5276	31.7	178.48	39.5508	32.6936	16.3468	0.00860842
5629	Wittenberg	0.00192973	97.6677	22.1491	22.6011	29	156.17	13.3093	11.8384	5.9192	0.0114224
5640	Wittmundhafen	0.00294902	119.108	23.4347	23.9129	30.4	167.614	7.60212	6.9737	3.48685	0.0102828
5705	Würzburg	0.00978194	120.837	26.1113	26.6442	34.2	200.004	19.5171	16.9526	8.47629	0.0829146
5792	Zugspitze	0.000109205	296.58	44.4732	45.3808	50.9	363.142	4.33512	4.08253	2.04127	0.000222917
5839	Emden	0.00269466	117.169	21.9748	22.4233	31.4	175.952	13.7567	12.2123	6.10616	0.0164541
5856	Fürstenzell	0.0038252	115.888	27.2116	27.767	37.5	229.64	60.1394	48.1041	24.052	0.0920038
5871	Hahn	0.00134532	111.026	22.4209	22.8785	29.6	161.041	8.90089	8.09833	4.04916	0.00544742
5906	Mannheim	0.0298969	89.3977	19.406	19.802	27.3	142.641	14.7136	13.009	6.50452	0.194465
5930	Schönhagen (Ostseebad)	0.00562164	129.388	28.3241	28.9022	35.7	213.306	18.2377	15.9106	7.95532	0.0447219
6091	Spiekeroog (SWN)	9.62776e-05	171.09	37.3493	38.1115	34.6	203.523	2.34202	2.25778	1.12889	0.000108687
6097	Darßer Ort (SWN)	5.84533e-05	135.313	26.8717	27.4201	29	156.17	2.13967	2.06882	1.03441	6.04647e-05
6102	Lindau (SWN)	0.00536243	115.677	24.7766	25.2822	23.9	116.841	1.04712	1.03201	0.516007	0.00276705
6211	Vogtareuth (Kläranlage)	0.00731512	103.036	25.1744	25.6882	29.8	162.676	10.1931	9.20605	4.60302	0.0336717
